# Supplementary material for: A predictive and mechanistic statistical modelling workflow for improving decision making in organic synthesis and catalysis
Source: Royal Society of Chemistry journal article supplement (doi:10.1039/d2ob00272h), 2022-01-01
Supplement: d2ob00272h1.xlsx [file d2ob00272h1.xlsx]

## Sheet: CPA Imine
	Parameters extracted from:
	Reid, J. P.; Sigman, M. S. Holistic Prediction of Enantioselectivity in Asymmetric Catalysis. Nature 2019, 571 (7765), 343–348. https://doi.org/10.1038/s41586-019-1384-z.
		Success Cutoff: ee = 95%														Full Training Set Data (Figure S1)
																MLR		MLoR			MLoR Model Validation			Val BS = 0.14
Reaction	ee	DDG	True Class	Pred ee	Probability	topological charge index 2	PEOE5	B5PG	LL	LUMO	Lcat	iPOSas	sin(AREA)			Measured ∆∆G	Predicted ∆∆G	log(odds)	True Class		TS Class	Predicted Probability		VS Class	Predicted Probability
TS1	26	0.246435	1	1.60524	0.125179	0.444	0	6.07	8.79	0.05402	2.58	290.812	0.773891			0.246435	0.840146	-2.04067	1		1	0.0813802		1	0.212599
TS2	38	0.370484	1	53.0753	0.010836	0.444	0	6.07	8.79	0.05402	2.58	289.91	-0.739181			0.641904	0.624856	-4.0591	1		0	0.0493858		1	0.067149
TS3	44	0.43732	1	80.1393	0.0764844	0	59.278	6.07	8.79	0.05402	6.71	286.418	-0.768255			1.13089	1.33288	-0.87313	1		1	0.168253		1	0.402468
TS4	99	2.45099	0	86.7224	0.0247765	0.444	0	6.07	6.87	0.05402	6.71	286.418	-0.768255			0.307129	0.355257	-5.74702	1		1	0.0402582		1	0.0464506
TS5	85	1.16329	1	88.9368	0.108863	0.444	0	6.06	8.8	0.05402	6.71	286.418	-0.768255			0.370484	0.513791	-5.02035	1		1	0.192763		1	0.0956568
TS6	89	1.31681	1	92.3972	0.0997	0.444	0	7.98	6.78	0.05402	6.71	286.418	-0.768255			0	0.190062	-6.24724	1		1	0.0391909		1	0.0528737
TS7	94	2.05829	1	89.6503	0.0518496	0.444	0	5.8	6.76	0.0626	8.85	265.681	-0.966118			1.53579	1.4121	-0.641071	0		1	0.795428		0	0.795428
TS8	92	1.88181	1	89.938	0.0563558	0.444	0	5.8	6.76	0.05955	8.85	265.681	-0.966118			0.641904	0.499363	-3.83463	1		0	0.854534		0	0.942025
TS9	93	1.96395	1	92.5606	0.132206	0.444	0	5.8	6.76	0.02713	8.85	265.681	-0.966118			0.43732	1.20317	-1.95946	1		0	0.883175		1	0.431481
TS10	89	1.68392	1	90.6243	0.136702	0.444	0	5.8	8.06	0.0626	8.85	265.681	-0.966118			0	0.499363	-3.83463	1		1	0.00197611		0	0.885283
TS11	91	1.80897	1	89.6106	0.0506607	0.444	0	5.79	6.74	0.0626	8.85	265.681	-0.966118			0	0.499363	-3.83463	1		1	0.0228312		1	0.0061183
TS12	43	0.544633	1	18.8325	0.00159563	0.222	0	5.8	6.76	0.01469	2.58	289.91	-0.739181			1.93762	1.33231	-0.99917	0		1	0.0541406		1	0.0226836
TS13	99.2	3.26703	0	94.309	0.67617	0.444	0	5.8	6.76	0.01469	4.69	174.156	0.670229			1.80205	1.62374	0.286588	0		1	0.0787667		1	0.127709
TS14	90.8	1.79534	1	94.309	0.67617	0.444	0	5.8	6.76	0.01469	4.69	174.156	0.670229			2.12771	1.18772	-1.64795	0		1	0.145687		1	0.325431
TS15	97	2.4778	0	94.5599	0.770402	0.444	0	5.8	7.34	0.01469	4.69	174.156	0.670229			2.45099	1.1952	-1.61424	0		1	0.337787		1	0.145687
TS16	97	2.4778	0	95.1334	0.915299	0.444	0	5.8	8.77	0.01469	4.69	174.156	0.670229			1.60956	1.38682	-0.754351	0		0	0.169817		1	0.177343
TS17	99	3.1343	0	94.9953	0.755454	0.444	0	5.8	6.76	0.00113	4.69	174.156	0.670229			1.16329	1.41167	-0.642842	1		1	0.284727		0	0.763105
TS18	92	1.88181	1	92.2126	0.44368	0.444	0	5.8	6.76	0.04801	4.69	174.156	0.670229			1.53579	1.19068	-1.63451	0		0	0.717375		0	0.717375
TS19	98	2.72089	0	95.0152	0.757688	0.444	0	5.8	6.76	0.00071	4.69	174.156	0.670229			1.69636	1.12742	-1.91836	0		0	0.836967		0	0.842708
TS20	35	0.432777	1	39.8194	0.000996431	0.444	0	3.33	6.77	0.04449	2.58	249.427	-0.521551			1.31681	1.10299	-2.02809	1		0	0.721682		0	0.875272
TS21	77	1.20832	1	82.5613	0.0128465	1.111	0	3.4	6.8	0.03987	2.58	289.91	-0.739181			1.47155	1.1911	-1.63274	0		0	0.99041		1	0.961358
TS22	82	1.36996	1	84.7162	0.0598319	1.111	0	3.33	8.81	0.03987	2.58	289.91	-0.739181			1.31681	1.48111	-0.353582	1		1	0.069472		1	0.596348
TS23	81	1.33469	1	84.693	0.0598367	1.111	0	3.32	8.82	0.03987	2.58	289.91	-0.739181			1.23453	1.30407	-1.12589	1		1	0.203944		1	0.134146
TS24	91	1.96066	1	88.607	0.0626631	0.444	0	3.21	6.8	-0.01579	8.85	265.681	-0.966118			1.16329	1.33005	-1.00931	1		1	0.359201		0	0.28622
TS25	87	1.71108	1	89.6094	0.16442	0.444	0	3.21	8.12	-0.01579	8.85	265.681	-0.966118			1.19773	1.62768	0.303807	1		0	0.635285		1	0.0595812
TS26	56	0.749434	1	46.2622	0.00379953	0.444	0	4.8	6.75	-0.0154	2.58	298.002	-0.85552			2.05829	1.65944	0.222545	0		1	0.533746		0	0.707284
TS27	80	1.30103	1	93.681	0.186852	0.444	0	4.8	6.75	-0.0154	8.85	265.681	-0.966118			1.74348	1.65919	0.221476	0		1	0.112774		1	0.939839
TS28	87	1.5787	1	89.825	0.134795	0	59.278	4.8	6.75	-0.0154	8.85	265.681	-0.966118			1.62926	1.68992	0.351575	1		1	0.113811		1	0.358385
TS29	89	1.68392	1	89.825	0.134795	0	59.278	4.8	6.75	-0.0154	8.85	265.681	-0.966118			1.88181	1.73004	0.521478	0		1	0.0366049		1	0.0543129
TS30	90	1.74348	1	90.9506	0.35441	0	59.278	4.8	8.29	-0.0154	8.85	265.681	-0.966118			1.88181	1.67869	0.304024	0		1	0.0606059		1	0.0606059
TS31	94	2.05829	1	90.2652	0.151725	0	59.278	4.8	6.75	-0.02018	8.85	265.681	-0.966118			1.33469	1.66209	0.233765	1		0	0.110079		0	0.0473982
TS32	96	2.30445	0	90.1682	0.14779	0	59.278	4.8	6.75	-0.01911	8.85	265.681	-0.966118			1.96395	1.94645	1.43778	0		1	0.0480668		1	0.14747
TS33	43	0.498966	1	95.1474	0.170254	0.444	0	4.8	6.75	-0.01148	8.85	265.681	-0.966118			1.80897	1.82664	0.930475	0		0	0.0327889		1	0.0483713
TS34	98	2.12771	0	97.8126	0.650693	0.444	0	4.8	6.75	-0.00966	4.69	174.156	0.670229			2.16929	1.68784	0.342759	0		1	0.0938252		1	0.630852
TS35	98	2.31022	0	96.717	0.618149	0.444	0	4.8	6.75	-0.0048	4.69	174.156	0.670229			1.96395	1.88323	1.1701	0		1	0.0401824		1	0.0676933
TS36	99	2.45099	0	97.6778	0.618149	0.444	0	4.8	6.75	-0.0048	4.69	174.156	0.670229			1.88181	1.83228	0.998039	0		1	0.0410614		1	0.133313
TS37	96	1.80205	0	97.899	0.78438	0.444	0	4.8	7.74	-0.0048	4.69	174.156	0.670229			1.62926	1.72496	0.516523	1		1	0.110779		1	0.0938263
TS38	99	2.45099	0	97.9117	0.792564	0.444	0	4.8	7.8	-0.0048	4.69	174.156	0.670229			1.96395	1.80291	0.866256	0		1	0.0808077		1	0.0391909
TS39	98	2.12771	0	97.6848	0.623924	0.444	0	4.8	6.78	-0.0048	4.69	174.156	0.670229			1.68392	1.8063	0.881461	1		1	0.307255		1	0.198309
TS40	99	2.45099	0	97.9927	0.837939	0.444	0	4.81	8.16	-0.0048	4.69	174.156	0.670229			1.80897	1.77693	0.749678	0		1	0.0566392		1	0.551948
TS41	92	1.47155	1	98.6109	0.861187	0.444	0	6.46	6.75	-0.0048	4.69	174.156	0.670229			1.40705	1.8865	1.24133	1		0	0.795428		0	0.795428
TS42	95	1.69636	0	98.8652	0.969797	0.444	0	6.45	8.77	-0.0048	4.69	174.156	0.670229			1.44618	1.65563	0.205569	1		1	0.795428		0	0.795428
TS43	82	1.36996	1	59.5794	0.0270932	0.222	0	3.32	8.9	-0.01579	6.59	294.135	-0.739181			1.80897	1.65563	0.205569	0		0	0.90564		0	0.890698
TS44	87	1.5787	1	87.3406	0.544267	0.222	0	3.32	8.9	-0.01579	4.69	174.156	0.670229			1.74348	1.9901	1.65887	0		0	0.822927		0	0.757096
TS45	89	1.68392	1	92.2289	0.271876	0.444	0	3.3	8.9	-0.01336	8.85	265.681	-0.966118			0.918149	1.4105	-0.894315	1		0	0.954468		1	0.97483
TS46	93	1.96395	1	85.1618	0.107833	0.222	0	3.25	8.93	-0.01579	8.85	265.681	-0.966118			0.366549	1.50535	-0.0943495	1		1	0.439436		0	0.445847
TS47	96	2.30445	0	86.6211	0.257604	0.222	0	3.3	10.17	-0.01579	8.85	265.681	-0.966118			0.544633	0.0343918	-6.78003	1		0	0.320937		1	0.00222002
TS48	73	1.09985	1	91.7496	0.400171	0.444	0	5.8	6.76	0.05419	4.69	174.156	0.670229			0.446328	0.222049	-6.09066	1		1	0.000775539		1	0.00518754
TS49	86	1.53165	1	90.4252	0.0651778	0.444	0	5.8	6.76	0.05419	8.85	265.681	-0.966118			1.80897	1.69512	0.685762	0		1	0.0220612		1	0.052747
TS50	95	2.16929	0	94.4262	0.381969	0.444	0	7.91	7.34	0.05419	8.85	265.681	-0.966118			0.55924	1.23875	-0.911016	1		1	0.0233014		1	0.0229905
TS51	91	1.80897	1	94.1648	0.276131	0.444	0	7.91	6.75	0.05419	8.85	265.681	-0.966118			3.1343	2.15148	2.28254	0		1	0.0176683		1	0.0541406
TS52	97	2.4778	0	94.6221	0.473778	0.444	0	7.91	7.8	0.05419	8.85	265.681	-0.966118			3.26703	2.15148	2.28254	0		1	0.107795		1	0.0801182
TS53	93	1.96395	1	96.3588	0.692353	0.444	0	7.91	7.34	0.00945	8.85	265.681	-0.966118			3.02575	2.15148	2.28254	0		1	0.201972		1	0.249152
TS54	30	0.366549	1	71.2705	0.0405505	0	0	3.32	6.26	-0.01579	4.69	174.156	0.670229			3.02575	2.15148	2.28254	0		1	0.23787		1	0.200169
TS55	14	0.166891	1	75.107	0.189324	0	0	3.31	8.36	-0.01579	4.69	174.156	0.670229			2.4778	2.15148	2.28254	0		1	0.145687		1	0.213554
Prediction Set 1	60	0.641904	1	-53.3489	0.0245381	0.444	0	6.07	8.79	0.05402	2.58	289.139	-0.262375			1.79534	2.15148	2.28254	0		1	0.145687		1	0.145687
Prediction Set 2	32	0.307129	1	-68.7071	0.00563963	0.444	0	6.07	8.79	0.05402	2.58	304.189	-0.953753			1.60858	2.15148	2.28254	1		1	0.145687		1	0.264679
Prediction Set 3	0	0	1	-84.9222	0.00351265	0.444	0	6.07	8.79	0.05402	2.58	324.317	-0.991779			2.4778	2.217	2.57652	0		1	0.144804		0	0.474048
Prediction Set 4	60	0.641904	1	-59.9125	0.0113525	0	0	6.07	8.79	0.05402	6.71	286.418	-0.768255			3.1343	2.29495	2.92625	0		1	0.195398		1	0.16315
Prediction Set 5	0	0	1	-59.9125	0.0113525	0	0	6.07	8.79	0.05402	6.71	286.418	-0.768255			3.1343	2.32432	3.05803	0		0	0.231553		1	0.214949
Prediction Set 6	97	1.93762	0	74.8989	0.0639689	0.444	0	6.08	8.07	0.05402	6.71	286.418	-0.768255			1.96395	2.29834	2.94146	0		1	0.778857		1	0.778857
Prediction Set 7	98	2.12771	0	68.7794	0.0234282	0.444	0	6.08	6.79	0.05402	6.71	286.418	-0.768255			2.72089	2.26897	2.80967	0		0	0.754036		0	0.778857
Prediction Set 8	94	1.60956	1	76.7883	0.0925968	0.444	0	6.06	8.58	0.05402	6.71	286.418	-0.768255			2.4778	2.37854	3.30133	0		0	0.717375		0	0.717375
Prediction Set 9	93	1.53579	1	68.8288	0.0239982	0.444	0	6.07	6.83	0.05402	6.71	286.418	-0.768255			2.72089	2.18043	2.41255	0		0	0.717375		0	0.717375
Prediction Set 10	95	1.69636	0	65.7944	0.015315	0.444	0	6.07	6.27	0.05402	6.71	286.418	-0.768255			2.72089	2.16435	2.33704	0		0	0.91496		0	0.714579
Prediction Set 11	92	1.47155	1	68.9358	0.0239962	0.444	0	6.08	6.82	0.05402	6.71	286.418	-0.768255			2.30445	2.12303	2.16206	0		0	0.794333		0	0.71593
Prediction Set 12	87	1.23453	1	73.7905	0.0527642	0.444	0	6.08	7.82	0.05402	6.71	286.418	-0.768255			3.1343	2.23704	2.64479	0		0	0.883617		0	0.863204
Prediction Set 13	86	1.19773	1	91.3808	0.241276	0.444	0	8	8.05	0.05402	6.71	286.418	-0.768255			2.30445	2.36827	3.20045	0		0	0.913323		0	0.811148
Prediction Set 14	90	1.74348	1	90.1191	0.0517929	0.444	0	5.8	6.76	0.06264	8.85	265.681	-0.966118			0.820861	2.44726	3.53491	1		0	0.973735		0	0.636913
Prediction Set 15	92	1.88181	1	91.9307	0.0702448	0.444	0	5.8	6.76	0.05141	8.85	265.681	-0.966118			1.88181	1.94126	1.39242	0		1	0.103021		1	0.097497
Prediction Set 16	81	1.33469	1	90.2004	0.0524493	0.444	0	5.8	6.76	0.06218	8.85	265.681	-0.966118			2.16929	2.14303	2.24674	0		1	0.023848		1	0.0797175
Prediction Set 17	91	1.80897	1	93.8944	0.105204	0.444	0	5.8	6.76	0.0361	8.85	265.681	-0.966118			2.16929	1.94877	1.42421	0		1	0.0518008		1	0.228787
Prediction Set 18	92	1.88181	1	92.1293	0.160455	0.444	0	5.8	8.29	0.0626	8.85	265.681	-0.966118			2.05829	1.94542	1.41005	0		1	0.208446		1	0.127725
Prediction Set 19	93	1.96395	1	91.8188	0.133833	0.444	0	5.8	8.03	0.0626	8.85	265.681	-0.966118			2.72089	2.23969	2.65601	0		0	0.143146		0	0.234819
Prediction Set 20	91	1.80897	1	91.5343	0.113488	0.444	0	5.8	7.8	0.0626	8.85	265.681	-0.966118			2.05152	1.88031	1.13436	0		1	0.132447		1	0.0595812
Prediction Set 21	84	1.44618	1	90.0524	0.0506607	0.444	0	5.79	6.74	0.0626	8.85	265.681	-0.966118			0.277339	0.247343	-4.68387	1		1	0.0318208		1	0.021905
Prediction Set 22	90	1.74348	1	95.244	0.266891	0.444	0	5.8	8.03	0.03293	8.85	265.681	-0.966118			0.277339	0.210019	-4.5826	1		1	0.311587		1	0.0588154
Prediction Set 23	30	0.366549	1	84.952	0.0627106	0.222	0	5.8	6.76	0.01469	8.85	265.681	-0.966118			0.432777	0.284354	-6.37769	1		0	0.739981		0	0.535516
Prediction Set 24	36	0.446328	1	-54.9053	0.00206253	0.222	0	5.8	6.76	0.01469	3.61	287.495	-0.966118			0.544633	-0.0790122	-7.66354	1		1	0.531975		0	0.828119
Prediction Set 25	44	0.55924	1	62.2291	0.164079	0	0	5.8	6.76	0.01469	4.69	174.156	0.670229			0.682531	1.32129	-2.74259	1		0	0.962298		1	0.739981
Prediction Set 26	99	3.1343	0	96.9396	0.67617	0.444	0	5.8	6.76	0.01469	4.69	174.156	0.670229			1.00419	1.31551	-2.76818	1		1	0.0196775		0	0.256454
Prediction Set 27	98.8	3.02575	0	96.9396	0.67617	0.444	0	5.8	6.76	0.01469	4.69	174.156	0.670229			1.20832	1.33553	-2.67951	1		1	0.0974507		1	0.493957
Prediction Set 28	97	2.4778	0	96.9396	0.67617	0.444	0	5.8	6.76	0.01469	4.69	174.156	0.670229			1.44618	1.5468	-1.73064	1		1	0.149305		1	0.318592
Prediction Set 29	87.6	1.60858	1	96.9396	0.67617	0.444	0	5.8	6.76	0.01469	4.69	174.156	0.670229			1.53165	1.66315	-1.20858	1		1	0.0606059		1	0.169184
Prediction Set 30	99	3.1343	0	97.4797	0.855066	0.444	0	5.8	8.03	0.01469	4.69	174.156	0.670229			1.40705	1.69026	-1.08693	1		0	0.621308		1	0.0283542
Prediction Set 31	98	2.72089	0	97.3894	0.830165	0.444	0	5.8	7.8	0.01469	4.69	174.156	0.670229			1.36996	1.55174	-1.7086	1		1	0.108693		1	0.0504731
Prediction Set 32	98	2.72089	0	97.0495	0.720905	0.444	0	5.79	7.03	0.01469	4.69	174.156	0.670229			1.5787	1.55442	-1.69669	1		1	0.280729		0	0.0497032
Prediction Set 33	96	2.30445	0	96.6722	0.647017	0.444	0	5.8	6.76	0.0192	4.69	174.156	0.670229			1.62926	1.555	-1.69364	1		1	0.149148		1	0.0595972
Prediction Set 34	96	2.30445	0	98.3885	0.849251	0.444	0	5.8	6.76	-0.01967	4.69	174.156	0.670229			1.74348	1.55287	-1.70353	0		1	0.686381		1	0.00863534
Prediction Set 35	60	0.820861	1	98.7256	0.889965	0.444	0	5.8	6.76	-0.03219	4.69	174.156	0.670229			1.33469	1.55132	-1.71037	1		0	0.795428		0	0.920306
Prediction Set 36	95	2.16929	0	94.4576	0.45218	0.444	0	5.8	6.76	0.04682	4.69	174.156	0.670229			1.09985	1.51765	-1.85406	1		0	0.811225		1	0.907448
Prediction Set 37	94	2.05829	1	94.4034	0.44839	0.444	0	5.8	6.76	0.04735	4.69	174.156	0.670229			1.96066	1.75705	0.565619	0		1	0.00235992		0	0.784529
Prediction Set 38	99	2.05152	0	94.9817	0.376302	0.444	0	5.8	6.76	0.05767	4.69	174.156	0.670229			1.96066	1.75705	0.565619	0		1	0.0448385		1	0.00544321
Prediction Set 39	23	0.277339	1	-91.6446	0.00419078	0.444	0	3.33	6.77	0.04449	2.58	299.735	0.920026			1.96066	1.75705	0.565619	0		1	0.0541406		1	0.0230228
Prediction Set 40	43	0.544633	1	-85.2616	0.000300928	0.444	0	3.33	6.77	0.04449	2.58	289.91	-0.739181			1.96066	1.87566	1.09782	0		0	0.200827		1	0.124572
Prediction Set 41	69	1.00419	1	75.8493	0.0114822	1.111	0	3.3	6.76	0.03987	2.58	289.91	-0.739181			2.0396	1.90165	1.2144	0		1	0.0954664		1	0.177428
Prediction Set 42	84	1.44618	1	82.3871	0.0580226	1.111	0	3.32	8.78	0.03987	2.58	289.91	-0.739181			1.88967	1.8237	0.864666	0		1	0.132579		1	0.145687
Prediction Set 43	83	1.40705	1	85.5473	0.14824	1.111	0	3.32	10.05	0.03987	2.58	289.91	-0.739181			1.71108	1.90617	1.23467	1		1	0.206023		1	0.414495
Prediction Set 44	87	1.5787	1	82.66	0.0607538	1.111	0	3.34	8.82	0.03987	2.58	289.91	-0.739181			2.35119	1.99131	1.61659	0		1	0.131867		1	0.778857
Prediction Set 45	90	1.74348	1	82.578	0.0602936	1.111	0	3.33	8.82	0.03987	2.58	289.91	-0.739181			2.23088	1.99244	1.62166	0		0	0.728084		0	0.778857
Prediction Set 46	73	1.09985	1	80.7968	0.0511445	1.111	0	3.32	8.78	0.04449	2.58	289.91	-0.739181			1.21999	1.8542	1.00152	1		0	0.717375		0	0.717375
Prediction Set 47	91	1.96066	1	94.2034	0.0626631	0.444	0	3.21	6.8	-0.01579	8.85	265.681	-0.966118			0.574007	0.850812	-2.08873	1		0	0.723013		0	0.717375
Prediction Set 48	91	1.96066	1	95.1241	0.136282	0.444	0	3.21	7.85	-0.01579	8.85	265.681	-0.966118			0.749434	0.435779	-5.46977	1		0	0.598292		0	0.721682
Prediction Set 49	90	1.88967	1	94.7397	0.0977274	0.444	0	3.21	7.39	-0.01579	8.85	265.681	-0.966118			0.918149	0.813488	-1.98746	1		1	0.0363159		1	0.143087
Prediction Set 50	94	2.23088	1	95.902	0.268114	0.444	0	3.22	8.87	-0.01579	8.85	265.681	-0.966118			1.0271	1.34354	-0.921183	1		1	0.228787		0	0.12852
Prediction Set 51	45	0.574007	1	-38.2422	0.0669003	0.444	0	4.8	6.75	-0.0154	2.58	290.812	0.773891			1.23798	1.42276	-0.689125	1		1	0.0275469		1	0.20644
Prediction Set 52	65	0.918149	1	-51.6087	0.0712692	0.444	0	4.8	6.75	-0.0154	2.58	299.735	0.920026			1.30103	1.99542	1.61728	1		1	0.0713269		1	0.0595812
Prediction Set 53	78	1.23798	1	80.093	0.0576751	0.444	0	4.8	6.75	-0.0154	6.71	286.418	-0.768255			1.53165	1.78649	0.298888	1		0	0.535516		0	0.77521
Prediction Set 54	86	1.53165	1	92.6522	0.134795	0	59.278	4.8	6.75	-0.0154	8.85	265.681	-0.966118			1.0271	1.08268	-1.57628	1		0	0.95589		1	0.830068
Prediction Set 55	85	1.4876	1	88.9583	0.0658166	0.222	0	4.8	6.75	-0.0154	8.85	265.681	-0.966118			1.4876	1.53905	0.0205025	1		1	0.87383		1	0.31408
Prediction Set 56	88	1.62926	1	92.6522	0.134795	0	59.278	4.8	6.75	-0.0154	8.85	265.681	-0.966118			1.5787	1.78649	0.298888	1
Prediction Set 57	93	1.96395	1	92.6522	0.134795	0	59.278	4.8	6.75	-0.0154	8.85	265.681	-0.966118			1.62926	1.78649	0.298888	1
Prediction Set 58	93	1.96395	1	92.6522	0.134795	0	59.278	4.8	6.75	-0.0154	8.85	265.681	-0.966118			1.74348	1.78649	0.298888	0
Prediction Set 59	88	1.62926	1	93.8114	0.268851	0	59.278	4.8	7.8	-0.0154	8.85	265.681	-0.966118			1.96395	1.78649	0.298888	0
Prediction Set 60	90	1.74348	1	92.6402	0.133844	0	59.278	4.8	6.74	-0.0154	8.85	265.681	-0.966118			1.68392	1.78649	0.298888	1
Prediction Set 61	98	2.72089	0	95.4773	0.434295	0	59.278	4.8	8.29	-0.02701	8.85	265.681	-0.966118			1.96395	1.78649	0.298888	0
Prediction Set 62	92	1.88181	1	93.0401	0.14426	0	59.278	4.8	6.75	-0.01813	8.85	265.681	-0.966118			2.05829	1.85314	0.597935	0
Prediction Set 63	88	1.62926	1	93.6344	0.160982	0	59.278	4.8	6.75	-0.02261	8.85	265.681	-0.966118			1.62926	1.90511	0.83109	1
Prediction Set 64	95	2.16929	0	94.1701	0.178896	0	59.278	4.8	6.75	-0.02701	8.85	265.681	-0.966118			1.74348	1.96046	1.07945	0
Prediction Set 65	38	0.434045	1	-41.6362	0.0601691	0.444	0	4.8	6.75	-0.01148	2.58	290.812	0.773891			1.74348	1.78536	0.29382	0
Prediction Set 66	94	1.8857	1	97.9417	0.662545	0.444	0	4.8	6.75	-0.01148	4.69	174.156	0.670229			1.62926	2.01313	1.3159	1
Prediction Set 67	94	1.8857	1	97.9417	0.662545	0.444	0	4.8	6.75	-0.01148	4.69	174.156	0.670229			2.72089	2.03371	1.3896	0
Prediction Set 68	97	1.93762	0	97.9417	0.662545	0.444	0	4.8	6.75	-0.01148	4.69	174.156	0.670229			1.88181	1.80372	0.371818	0
Prediction Set 69	98	2.12771	0	97.8195	0.644033	0.444	0	4.8	6.75	-0.00865	4.69	174.156	0.670229			2.05829	1.81665	0.426583	0
Prediction Set 70	99	2.45099	0	97.6415	0.618149	0.444	0	4.8	6.75	-0.0048	4.69	174.156	0.670229			1.62926	1.83198	0.491499	1
Prediction Set 71	99	2.24074	0	97.6415	0.618149	0.444	0	4.8	6.75	-0.0048	4.69	174.156	0.670229			1.88181	1.7716	0.235842	0
Prediction Set 72	99	2.45099	0	97.6415	0.618149	0.444	0	4.8	6.75	-0.0048	4.69	174.156	0.670229			2.30445	1.8099	0.397998	0
Prediction Set 73	99	2.45099	0	97.6415	0.618149	0.444	0	4.8	6.75	-0.0048	4.69	174.156	0.670229			2.16929	1.85974	0.609042	0
Prediction Set 74	99	2.45099	0	97.6295	0.616237	0.444	0	4.79	6.75	-0.0048	4.69	174.156	0.670229			0.434045	0.82608	-2.19345	1
Prediction Set 75	99	2.45099	0	98.3215	0.894914	0.444	0	4.8	8.78	-0.0048	4.69	174.156	0.670229			0.498966	1.97068	1.51256	1
Prediction Set 76	97	1.93762	0	97.6376	0.616217	0.444	0	4.8	6.74	-0.0048	4.69	174.156	0.670229			1.8857	2.16045	2.29267	0
Prediction Set 77	99	2.45099	0	97.8633	0.723969	0.444	0	4.8	7.34	-0.0048	4.69	174.156	0.670229			1.8857	2.16045	2.29267	0
Prediction Set 78	99	2.45099	0	98.0965	0.821795	0.444	0	4.8	8.03	-0.0048	4.69	174.156	0.670229			1.8857	2.16045	2.29267	0
Prediction Set 79	99	2.45099	0	98.1777	0.850839	0.444	0	4.8	8.29	-0.0048	4.69	174.156	0.670229			2.10383	2.16045	2.29267	0
Prediction Set 80	99	2.45099	0	97.9199	0.746238	0.444	0	4.81	7.47	-0.0048	4.69	174.156	0.670229			1.93762	2.16045	2.29267	0
Prediction Set 81	99	2.45099	0	98.31	0.893374	0.444	0	4.79	8.77	-0.0048	4.69	174.156	0.670229			2.12771	2.14897	2.24405	0
Prediction Set 82	99	2.45099	0	97.4228	0.516164	0.444	0	4.79	6.25	-0.0048	4.69	174.156	0.670229			2.12771	2.14259	2.21707	0
Prediction Set 83	98	2.12771	0	99.0823	0.908166	0.444	0	6.45	7.33	-0.0048	4.69	174.156	0.670229			1.93762	2.12518	2.14334	0
Prediction Set 84	57	0.76683	1	-87.1238	0.037483	0.222	0	3.32	8.9	-0.01579	2.58	290.812	0.773891			2.45099	2.1183	2.11422	0
Prediction Set 85	54	0.715472	1	-90.6278	0.0400132	0.222	0	3.32	8.9	-0.01579	2.58	299.735	0.920026			2.31022	2.1183	2.11422	0
Prediction Set 86	1	0.0118429	1	-89.3692	0.00154117	0.222	0	3.32	8.9	-0.01579	2.58	304.189	-0.953753			2.24074	2.1183	2.11422	0
Prediction Set 87	72	1.07488	1	16.4396	0.0321745	0.222	0	3.32	8.9	-0.01579	6.71	286.418	-0.768255			2.45099	2.1183	2.11422	0
Prediction Set 88	26	0.315139	1	-84.2237	0.00679957	0.222	0	3.32	8.9	-0.01579	2.58	289.139	-0.262375			2.45099	2.1183	2.11422	0
Prediction Set 89	92	1.88181	1	96.1238	0.289308	0.444	0	3.32	8.9	-0.01579	8.85	265.681	-0.966118			2.45099	2.1183	2.11422	0
Prediction Set 90	92	1.88181	1	95.9288	0.275092	0.444	0	3.32	8.9	-0.01336	8.85	265.681	-0.966118			2.45099	2.1183	2.11422	0
Prediction Set 91	94	2.05829	1	83.3675	0.102456	0.222	0	3.24	8.87	-0.01579	8.85	265.681	-0.966118			2.45099	2.1183	2.11422	0
Prediction Set 92	95	2.16929	0	85.8619	0.210874	0.222	0	3.24	9.91	-0.01579	8.85	265.681	-0.966118			2.45099	2.11675	2.10738	0
Prediction Set 93	95	2.16929	0	84.0358	0.11178	0.222	0	3.31	8.92	-0.01579	8.85	265.681	-0.966118			1.80205	2.23014	2.61601	0
Prediction Set 94	83	1.40705	1	83.5756	0.105487	0.222	0	3.26	8.89	-0.01579	8.85	265.681	-0.966118			2.45099	2.34762	3.14314	0
Prediction Set 95	84	1.44618	1	93.5523	0.0651778	0.444	0	5.8	6.76	0.05419	8.85	265.681	-0.966118			1.69636	2.1183	2.11422	0
Prediction Set 96	77	1.20832	1	56.7297	0.0182322	0.444	0	5.8	6.76	0.05419	6.71	286.418	-0.768255			1.93762	2.11717	2.10915	0
Prediction Set 97	79	1.26884	1	82.6049	0.0451377	0	59.278	5.8	6.76	0.05419	8.85	265.681	-0.966118			2.45099	2.23692	2.64642	0
Prediction Set 98	90	1.74348	1	96.8688	0.181548	0.444	0	7.23	6.76	0.05419	8.85	265.681	-0.966118			2.45099	2.18495	2.41327	0
Prediction Set 99	88	1.62926	1	93.52	0.0646864	0.444	0	5.79	6.76	0.05419	8.85	265.681	-0.966118			2.12771	2.12211	2.1312	0
Prediction Set 100	96	2.30445	0	97.7867	0.277769	0.444	0	7.91	6.76	0.05419	8.85	265.681	-0.966118			2.45099	2.2629	2.763	0
Prediction Set 101	98	2.72089	0	98.2109	0.520769	0.444	0	7.91	8.03	0.05419	8.85	265.681	-0.966118			2.12771	2.12169	2.12943	0
Prediction Set 102	95	2.16929	0	98.4198	0.665597	0.444	0	7.91	8.77	0.05419	8.85	265.681	-0.966118			2.45099	2.29227	2.89478	0
Prediction Set 103	91	1.80897	1	97.7793	0.2745	0.444	0	7.91	6.74	0.05419	8.85	265.681	-0.966118			1.93762	2.12169	2.12943	0
Prediction Set 104	89	1.68392	1	98.2109	0.520769	0.444	0	7.91	8.03	0.05419	8.85	265.681	-0.966118			2.45099	2.20119	2.486	0
Prediction Set 105	96	2.30445	0	99.2845	0.798261	0.444	0	7.91	8.03	0.00945	8.85	265.681	-0.966118			2.45099	2.27913	2.83573	0
Prediction Set 106	47	0.604052	1	21.9936	0.00651153	0	0	5.8	6.76	0.05419	8.85	265.681	-0.966118			2.45099	2.34494	3.13124	0
Prediction Set 107	96	2.30445	0	93.7502	0.259315	0	59.278	4.8	7.74	-0.0154	8.85	265.681	-0.966118			2.45099	2.03429	1.73737	0
Prediction Set 108	80	1.30103	1	96.4963	0.479691	0.444	0	4.8	6.75	0.01469	4.69	174.156	0.670229			2.45099	2.06027	1.85395	0
Prediction Set 109	51	0.666414	1	38.4848	0.0341035	0	0	3.31	6.05	-0.01579	4.69	174.156	0.670229			1.47155	2.37563	3.24952	0
Prediction Set 110	23	0.277339	1	52.27	0.159913	0	0	3.31	8.11	-0.01579	4.69	174.156	0.670229			1.69636	2.60227	4.26653	0
Prediction Set 111	84	1.13089	1	61.1286	0.0928252	0.444	0	6.07	8.79	0.05402	6.59	294.135	-0.739181			2.12771	2.4396	3.53666	0
Prediction Set 112	93	1.53579	1	70.9832	0.108855	0.444	0	6.07	8.79	0.05402	6.71	286.418	-0.768255			0.76683	0.41036	-3.59753	1
Prediction Set 113	0	0	1	-53.0239	0.0113525	0	0	6.07	8.79	0.05402	6.71	286.418	-0.768255			0.252449	0.0840041	-6.57721	1
Prediction Set 114	96	1.80205	0	86.5407	0.238356	0.444	0	7.96	8.07	0.05402	6.71	286.418	-0.768255			0.715472	0.373035	-3.49627	1
Prediction Set 115	89	1.31681	1	57.6187	0.0128244	0.444	0	6.08	6.04	0.05402	6.71	286.418	-0.768255			1.36996	0.903089	-2.42999	1
Prediction Set 116	85	1.16329	1	67.8762	0.0629964	0.444	0	6.08	8.05	0.05402	6.71	286.418	-0.768255			0.0118429	-0.0745298	-7.30388	1
Prediction Set 117	88	1.62926	1	93.0757	0.0591533	0.444	0	5.8	6.76	0.05777	8.85	265.681	-0.966118			1.74348	1.55496	0.108475	0
Prediction Set 118	93	1.96395	1	96.9443	0.16908	0.444	0	5.8	6.76	0.01711	8.85	265.681	-0.966118			1.07488	0.982309	-2.19793	1
Prediction Set 119	95	2.16929	0	93.0301	0.058625	0.444	0	5.8	6.76	0.0581	8.85	265.681	-0.966118			1.5787	1.74473	0.888587	1
Prediction Set 120	88	1.62926	1	93.0665	0.0807791	0.444	0	5.8	7.34	0.0626	8.85	265.681	-0.966118			0.315139	0.195069	-5.61596	1
Prediction Set 121	83	1.40705	1	94.516	0.220583	0.444	0	5.8	8.77	0.0626	8.85	265.681	-0.966118			1.88181	2.01133	1.70525	0
Prediction Set 122	65	0.918149	1	89.0919	0.00896552	0.444	0	5.79	4.57	0.0626	8.85	265.681	-0.966118			1.88181	2.01133	1.70525	0
Prediction Set 123	91	1.80897	1	91.1123	0.390317	0.222	0	5.8	6.76	0.01469	4.69	174.156	0.670229			1.68392	1.9929	1.62666	1
Prediction Set 124	98.8	3.02575	0	97.8993	0.67617	0.444	0	5.8	6.76	0.01469	4.69	174.156	0.670229			1.88181	1.996	1.64034	0
Prediction Set 125	99	3.1343	0	98.3747	0.879483	0.444	0	5.8	8.29	0.01469	4.69	174.156	0.670229			2.16929	1.5403	0.0436247	0
Prediction Set 126	93	1.96395	1	98.3107	0.858081	0.444	0	5.8	8.06	0.01469	4.69	174.156	0.670229			1.80897	1.99554	1.63533	0
Prediction Set 127	98	2.72089	0	97.985	0.688937	0.444	0	5.8	6.76	0.01265	4.69	174.156	0.670229			2.05829	1.53917	0.0385561	0
Prediction Set 128	95	2.16929	0	97.8412	0.667638	0.444	0	5.8	6.76	0.01603	4.69	174.156	0.670229			2.16929	1.65666	0.565689	0
Prediction Set 129	23	0.277339	1	-88.4978	0.00391654	0.444	0	3.33	6.77	0.04449	2.58	290.812	0.773891			1.96395	1.5475	0.0758068	0
Prediction Set 130	52	0.682531	1	76.2122	0.0118566	1.111	0	3.33	6.77	0.03987	2.58	289.91	-0.739181			2.30445	1.69533	0.738508	0
Prediction Set 131	86	1.53165	1	84.9931	0.125126	1.111	0	3.32	9.81	0.03987	2.58	289.91	-0.739181			2.16929	1.55567	0.111773	0
Prediction Set 132	88	1.62926	1	82.4926	0.0617136	1.111	0	3.3	8.88	0.03987	2.58	289.91	-0.739181			1.40705	1.54453	0.0623716	1
Prediction Set 133	91	1.96066	1	94.2034	0.0626631	0.444	0	3.21	6.8	-0.01579	8.85	265.681	-0.966118			0.858589	1.06063	-2.09125	1
Prediction Set 134	92	2.0396	1	95.3059	0.159975	0.444	0	3.21	8.08	-0.01579	8.85	265.681	-0.966118			1.44618	1.7125	0.447212	1
Prediction Set 135	95	2.35119	0	95.8952	0.266512	0.444	0	3.22	8.86	-0.01579	8.85	265.681	-0.966118			1.09985	1.90227	1.22732	1
Prediction Set 136	74	1.21999	1	94.9688	0.119002	0.444	0	3.21	7.66	-0.01579	8.85	265.681	-0.966118			1.20832	1.13985	-1.85919	1
Prediction Set 137	70	1.0271	1	72.8407	0.0487695	0.444	0	4.8	6.75	-0.0154	6.59	294.135	-0.739181			1.15222	1.7125	0.447212	1
Prediction Set 138	70	1.0271	1	59.2338	0.0211445	0	0	4.8	6.75	-0.0154	8.85	265.681	-0.966118			1.26884	1.50358	-0.87118	1
Prediction Set 139	90	1.74348	1	92.6522	0.134795	0	59.278	4.8	6.75	-0.0154	8.85	265.681	-0.966118			1.53165	1.7125	0.447212	1
Prediction Set 140	94	2.05829	1	93.3271	0.201544	0	59.278	4.8	7.34	-0.0154	8.85	265.681	-0.966118			1.74348	1.93418	1.42521	0
Prediction Set 141	88	1.62926	1	94.6969	0.446399	0	59.278	4.79	8.77	-0.0154	8.85	265.681	-0.966118			1.44618	1.73421	0.54296	1
Prediction Set 142	92	1.88181	1	92.3001	0.127041	0	59.278	4.8	6.75	-0.01304	8.85	265.681	-0.966118			1.62926	1.71095	0.440373	1
Prediction Set 143	94	1.8857	1	97.9417	0.662545	0.444	0	4.8	6.75	-0.01148	4.69	174.156	0.670229			2.4778	2.03959	1.89027	0
Prediction Set 144	97	2.10383	0	97.9417	0.662545	0.444	0	4.8	6.75	-0.01148	4.69	174.156	0.670229			2.30445	2.03959	1.89027	0
Prediction Set 145	97	1.93762	0	97.6933	0.625553	0.444	0	4.8	6.75	-0.00589	4.69	174.156	0.670229			2.16929	2.10511	2.18425	0
Prediction Set 146	99	2.45099	0	97.6415	0.618149	0.444	0	4.8	6.75	-0.0048	4.69	174.156	0.670229			2.72089	2.18305	2.53398	0
Prediction Set 147	99	2.45099	0	97.6415	0.618149	0.444	0	4.8	6.75	-0.0048	4.69	174.156	0.670229			2.72089	2.21355	2.67083	0
Prediction Set 148	95	1.69636	0	97.6415	0.618149	0.444	0	4.8	6.75	-0.0048	4.69	174.156	0.670229			2.16929	2.26664	2.90906	0
Prediction Set 149	98	2.12771	0	97.6614	0.623904	0.444	0	4.81	6.77	-0.0048	4.69	174.156	0.670229			1.80897	2.03846	1.8852	0
Prediction Set 150	97	1.93762	0	97.6533	0.623924	0.444	0	4.8	6.78	-0.0048	4.69	174.156	0.670229			1.80897	2.03733	1.88013	0
Prediction Set 151	99	2.45099	0	97.3219	0.469182	0.444	0	4.79	6.02	-0.0048	4.69	174.156	0.670229			1.74348	2.2682	2.9159	0
Prediction Set 152	21	0.252449	1	-83.5348	0.00297249	0.222	0	3.32	8.9	-0.01579	2.58	289.91	-0.739181			1.68392	2.18305	2.53398	1
Prediction Set 153	90	1.74348	1	84.062	0.110962	0.222	0	3.32	8.9	-0.01579	8.85	265.681	-0.966118			2.4778	2.15707	2.4174	0
Prediction Set 154	92	1.88181	1	96.1238	0.289308	0.444	0	3.32	8.9	-0.01579	8.85	265.681	-0.966118			2.30445	2.46532	3.72918	0
Prediction Set 155	95	2.16929	0	83.3933	0.10321	0.222	0	3.24	8.88	-0.01579	8.85	265.681	-0.966118			1.96395	2.38738	3.37945	0
Prediction Set 156	91	1.80897	1	95.9433	0.271302	0.444	0	3.24	8.87	-0.01579	8.85	265.681	-0.966118			2.72089	2.43934	3.6126	0
Prediction Set 157	62	0.858589	1	43.6302	0.015318	0.444	0	5.8	6.76	0.05419	6.59	294.135	-0.739181			0.604052	0.799772	-2.74634	1
Prediction Set 158	75	1.15222	1	93.5523	0.0651778	0.444	0	5.8	6.76	0.05419	8.85	265.681	-0.966118			2.30445	1.89833	0.800679	0
Prediction Set 159	84	1.44618	1	93.989	0.0724311	0.444	0	5.94	6.76	0.05419	8.85	265.681	-0.966118			1.88181	2.6099	3.88651	0
Prediction Set 160	97	2.4778	0	97.7867	0.277769	0.444	0	7.91	6.76	0.05419	8.85	265.681	-0.966118			1.30103	1.99534	1.59356	1
Prediction Set 161	98	2.72089	0	98.2901	0.575406	0.444	0	7.91	8.3	0.05419	8.85	265.681	-0.966118			0.366549	0.990135	-2.0463	1
Prediction Set 162	90	1.74348	1	98.4279	0.667396	0.444	0	7.92	8.77	0.05419	8.85	265.681	-0.966118			0.666414	0.964863	-2.15958	1
Prediction Set 163	98	2.72089	0	99.2563	0.766268	0.444	0	7.91	7.8	0.00945	8.85	265.681	-0.966118			0.166891	1.22581	-0.988735	1
Prediction Set 164	92	1.88181	1	99.5198	0.872557	0.667	0	5.8	6.76	0.01469	4.69	174.156	0.670229			0.094943	1.19489	-1.12736	1
Prediction Set 165	8	0.094943	1	52.0202	0.15774	0	0	3.3	8.1	-0.01579	4.69	174.156	0.670229			0.277339	1.19757	-1.11545	1

## Sheet: Minisci Reaction
	Parameters extracted from:
	Reid, J. P.; Proctor, R. S. J.; Sigman, M. S.; Phipps, R. J. Predictive Multivariate Linear Regression Analysis Guides Successful Catalytic Enantioselective Minisci Reactions of Diazines. J. Am. Chem. Soc. 2019, 141 (48), 19178–19185. https://doi.org/10.1021/jacs.9b11658.
		Success Cutoff: ee = 70%
													MLoR Model Validation			Val BS = 0.07
Reaction	ee	∆∆G	True Class	Pred ee	Probability	i POas	C2	C1	C6	L	C6B1		TS Class	Predicted Probability		VS Class	Predicted Probability
TS1	97	2.4778	0	93.9739	0.99987	174.156	0.023	-0.075	0.154	4.7	2.81		0	0.999884		0	1
TS2	71	1.05065	0	80.7964	0.954167	223.702	-0.195	-0.075	0.154	4.7	2.81		0	0.983704		0	0.999967
TS3	87	1.5787	0	78.6075	0.919568	292.454	0.027	-0.075	0.154	4.7	2.81		1	0.164418		1	5.52549e-11
TS4	70	1.0271	0	76.3102	0.868475	286.418	-0.034	-0.075	0.154	4.7	2.81		0	0.862505		0	4.44685e-10
TS5	49	0.63483	1	73.3616	0.775866	294.135	-0.049	-0.075	0.154	4.7	2.81		1	1.58107e-13		0	1
TS6	56	0.749434	1	61.3035	0.290581	290.812	-0.209	-0.075	0.154	4.7	2.81		1	1.10305e-15		1	5.48074e-13
TS7	76	1.17977	0	63.0831	0.351637	283.667	-0.217	-0.075	0.154	4.7	2.81		1	1.00965e-27		1	3.59551e-18
TS8	70	1.0271	0	77.6622	0.90239	233.103	-0.215	-0.075	0.154	4.7	2.81		1	1.14623e-16		1	8.12555e-27
TS9	86	1.53165	0	82.8105	0.892336	174.156	0.023	-0.088	0.15	4.7	2.39		0	1		1	7.37249e-13
TS10	53	0.69888	1	51.3449	0.0219892	223.702	-0.195	-0.088	0.15	4.7	2.39		1	2.55566e-12		1	5.1435e-15
TS11	48	0.619345	1	46.787	0.0121968	292.454	0.027	-0.088	0.15	4.7	2.39		1	1.67658e-17		1	4.70798e-27
TS12	27	0.327876	1	42.1788	0.00708088	286.418	-0.034	-0.088	0.15	4.7	2.39		1	3.78893e-26		1	5.34487e-16
TS13	29	0.353578	1	36.5117	0.00372462	294.135	-0.049	-0.088	0.15	4.7	2.39		1	0.150377		1	3.28358e-25
TS14	26	0.315139	1	15.8682	0.000442176	290.812	-0.209	-0.088	0.15	4.7	2.39		1	1.13825e-24		1	2.29083e-27
TS15	32	0.392754	1	18.6839	0.00058539	283.667	-0.217	-0.088	0.15	4.7	2.39		1	7.4672e-30		1	2.09686e-39
TS16	45	0.574007	1	44.8695	0.00988576	233.103	-0.215	-0.088	0.15	4.7	2.39		1	1.68753e-38		1	2.38052e-28
TS17	76	1.17977	0	77.2111	0.921396	174.156	0.023	-0.082	0.148	5.81	3		0	0.996134		0	1
TS18	32	0.392754	1	38.9203	0.0308186	223.702	-0.195	-0.082	0.148	5.81	3		1	0.642571		0	0.998882
TS19	32	0.392754	1	33.7083	0.0171633	292.454	0.027	-0.082	0.148	5.81	3		1	1.64554e-12		1	0.00582586
TS20	24	0.289874	1	28.5191	0.00998524	286.418	-0.034	-0.082	0.148	5.81	3		1	0.157408		1	1.32431e-11
TS21	26	0.315139	1	22.2454	0.00525964	294.135	-0.049	-0.082	0.148	5.81	3		0	0.86875		1	4.25676e-23
TS22	6	0.0711406	1	0.349223	0.000625258	290.812	-0.209	-0.082	0.148	5.81	3		1	8.56711e-26		1	2.79255e-28
TS23	15	0.178988	1	3.25066	0.00082772	283.667	-0.217	-0.082	0.148	5.81	3		1	7.84171e-38		1	6.31092e-37
TS24	28	0.340688	1	31.5394	0.0139245	233.103	-0.215	-0.082	0.148	5.81	3		1	8.90253e-27		0	1
TS25	53	0.69888	1	73.5517	0.356952	174.156	0.023	-0.077	0.1	4.7	1.09		0	0.973048		0	0.992073
TS26	17	0.203297	1	31.4894	0.00150356	223.702	-0.195	-0.077	0.1	4.7	1.09		0	0.2012		1	0.000820348
TS27	27	0.327876	1	25.9811	0.000826278	292.454	0.027	-0.077	0.1	4.7	1.09		1	2.3055e-13		0	1.85544e-12
TS28	17	0.203297	1	20.5465	0.000477393	286.418	-0.034	-0.077	0.1	4.7	1.09					1	0.0255063
TS29	9	0.106872	1	14.041	0.000250325	294.135	-0.049	-0.077	0.1	4.7	1.09
TS30	-4	-0.0473954	1	8.12203	2.96268e-05	290.812	-0.209	-0.077	0.1	4.7	1.09
TS31	10	0.118822	1	5.2326	3.92277e-05	283.667	-0.217	-0.077	0.1	4.7	1.09
TS32	11	0.130797	1	23.7037	0.000668259	233.103	-0.215	-0.077	0.1	4.7	1.09
TS33	95	2.16929	0	92.1742	0.999296	174.156	0.023	-0.075	0.283	4.7	1.7
TS34	72	1.07488	0	75.5574	0.793785	223.702	-0.195	-0.075	0.283	4.7	1.7
TS35	81	1.33469	0	72.8609	0.678863	292.454	0.027	-0.075	0.283	4.7	1.7
TS36	52	0.682531	1	70.05	0.549738	286.418	-0.034	-0.075	0.283	4.7	1.7
TS37	45	0.574007	1	66.4703	0.390265	294.135	-0.049	-0.075	0.283	4.7	1.7
TS38	39	0.487675	1	52.1538	0.0704041	290.812	-0.209	-0.075	0.283	4.7	1.7
TS39	55	0.732319	1	54.2348	0.0911408	283.667	-0.217	-0.075	0.283	4.7	1.7
TS40	47	0.604052	1	71.7018	0.630913	233.103	-0.215	-0.075	0.283	4.7	1.7
TS41	74	1.12561	0	78.012	0.685553	174.156	0.023	-0.071	0.063	4.7	1.09
TS42	36	0.446328	1	35.4815	0.00323744	292.454	0.027	-0.071	0.063	4.7	1.09
TS43	11	0.130797	1	30.3588	0.00187238	286.418	-0.034	-0.071	0.063	4.7	1.09
TS44	17	0.203297	1	24.1512	0.000982452	294.135	-0.049	-0.071	0.063	4.7	1.09
TS45	13	0.154829	1	2.36313	0.000116352	290.812	-0.209	-0.071	0.063	4.7	1.09
TS46	40	0.501707	1	5.26128	0.000154052	283.667	-0.217	-0.071	0.063	4.7	1.09
TS47	58	0.784523	1	33.3417	0.00261952	233.103	-0.215	-0.071	0.063	4.7	1.09
TS48	95	2.16929	0	91.7063	0.998973	174.156	0.023	-0.076	0.283	4.7	1.7
TS49	80	1.30103	0	74.2291	0.725157	223.702	-0.195	-0.076	0.283	4.7	1.7
TS50	85	1.4876	0	71.4099	0.591664	292.454	0.027	-0.076	0.283	4.7	1.7
TS51	72	1.07488	0	68.4761	0.455595	286.418	-0.034	-0.076	0.283	4.7	1.7
TS52	59	0.802527	1	64.7474	0.304937	294.135	-0.049	-0.076	0.283	4.7	1.7
TS53	56	0.749434	1	49.9165	0.0493504	290.812	-0.209	-0.076	0.283	4.7	1.7
TS54	72	1.07488	0	52.0641	0.064315	283.667	-0.217	-0.076	0.283	4.7	1.7
TS55	54	0.715472	1	70.1996	0.539526	233.103	-0.215	-0.076	0.283	4.7	1.7
Prediction Set 1	88	1.68577	0	89.0324	0.983764	143.094	0.03	-0.074	0.262	5.24	1.09
Prediction Set 2	83	1.43855	0	83.8094	0.847348	143.094	0.03	-0.081	0.254	5.13	1.09
Prediction Set 3	85	1.77094	0	90.4316	0.991624	143.094	0.03	-0.073	0.269	5.21	1.09
Prediction Set 4	94	2.18544	0	95.1312	0.999834	174.156	0.023	-0.074	0.421	5.26	1.7
Prediction Set 5	99	2.36244	0	96.3664	0.999957	174.156	0.023	-0.072	0.43	5.17	1.7
Prediction Set 6	91	2.32679	0	96.1453	0.999947	174.156	0.023	-0.072	0.43	5.22	1.7
Prediction Set 7	97	2.31683	0	96.0811	0.999938	174.156	0.023	-0.073	0.434	5.19	1.7
Prediction Set 8	97	2.30246	0	95.9868	0.999938	174.156	0.023	-0.072	0.429	5.25	1.7
Prediction Set 9	99	1.67343	0	88.8145	0.986808	174.156	0.023	-0.085	0.418	5.3	1.7
Prediction Set 10	97	1.88313	0	92.0171	0.997084	174.156	0.023	-0.083	0.426	5.16	1.7
Prediction Set 11	94	2.23008	0	95.4768	0.999875	174.156	0.023	-0.073	0.407	5.2	1.7
Prediction Set 12	99	2.50925	0	97.1529	0.999982	174.156	0.023	-0.082	0.669	5.13	1.4
Prediction Set 13	99	2.41668	0	96.6792	0.999967	174.156	0.023	-0.083	0.674	5.22	1.4
Prediction Set 14	65	0.892019	1	63.7074	0.034042	174.156	0.023	-0.094	0.261	4.76	1.09
Prediction Set 15	28	0.0945213	1	7.96462	0.000291412	174.156	0.023	-0.096	0.264	5.77	1.09
Prediction Set 16	69	1.16756	1	75.561	0.167342	143.094	0.03	-0.095	0.263	4.7	1.09
Prediction Set 17	90	2.00523	0	93.4559	0.999115	174.156	0.023	-0.065	0.175	5.04	1.7
Prediction Set 18	91	1.57143	0	86.8499	0.97308	174.156	0.023	-0.072	0.169	5.2	1.7
Prediction Set 19	56	1.16436	1	75.4448	0.467972	174.156	0.023	-0.081	0.255	5.14	1.09
Prediction Set 20	81	2.20276	0	95.2683	0.999847	174.156	0.023	-0.074	0.553	5.26	0.98
Prediction Set 21	55	2.47865	1	97.0042	0.999987	174.156	0.023	-0.075	0.559	5.33	1.66
Prediction Set 22	27	0.744749	1	55.7278	0.0275865	174.156	0.023	-0.088	0.093	5.2	1.87
Prediction Set 23	78	1.41575	0	83.2271	0.907071	174.156	0.023	-0.074	0.262	5.24	1.09
Prediction Set 24	30	1.22558	1	77.5864	0.609045	174.156	0.023	-0.066	0.02	4.99	1.09

## Sheet: Acylation
	Parameters extracted from:
	(1) Li, J.; Grosslight, S.; Miller, S. J.; Sigman, M. S.; Toste, F. D. Site-Selective Acylation of Natural Products with BINOL-Derived Phosphoric Acids. ACS Catal. 2019, 9 (11), 9794–9799. https://doi.org/10.1021/acscatal.9b03535.
	Success Cutoff: ss = 8:1		calculated as 1/(EXP(-C6/(0.001986*(298))))
									MLoR Model Validation			Val BS = 0
Cat	Site Selectivity	∆∆G	True Class	Probability	NBOP	B1	L		TS Class	Predicted Probability		VS Class	Predicted Probability
TCYP	12.3991	1.49	0	1	2.577	2.06	6.76		0	1		0	1
2,6-CY	10.296	1.38	0	1	2.576	2.06	2.57		0	1		0	1
2,6-iPr-4-ph	22.3989	1.84	0	1	2.575	1.99	6.86		0	1		1	0.160512
TRIP	8.84354	1.29	0	1	2.575	1.99	4.66		1	6.83986e-17		1	1.59578e-32
2,6-iPr	8.40643	1.26	0	1	2.574	1.99	2.57		1	4.98224e-33		1	1.13274e-78
3,5-Ph	1.63233	0.29	1	2.62768e-22	2.573	1.09	2.57		1	4.87765e-92		1	4.15702e-93
3,5-iPr	1.55165	0.26	1	3.97794e-34	2.572	1.09	2.57		1	4.00705e-94		1	7.2983e-218
Mes	2.85081	0.62	1	1.19465e-19	2.57	1.7	3.61		1	1.43344e-109
2,6-Me	2.32761	0.5	1	3.46764e-20	2.57	1.7	2.57
3,5-Me	1.63233	0.29	1	2.11432e-81	2.568	1.09	2.58
biphenyl	3.73576	0.78	1	5.20084e-91	2.567	1.09	6.86
4-iPr	2.17549	0.46	1	3.79902e-92	2.567	1.09	4.66
2-iPr	1.80649	0.35	1	3.16294e-93	2.567	1.09	2.57
3,5-CF3	1.57809	0.27	1	4.78826e-105	2.566	1.09	2.57
9-anthryl	4.13435	0.84	1	3.52266e-133	2.557	2.36	2.58

## Sheet: Hydrogen-Bond Donor
	Parameters extracted from:
	(1) Werth, J.; Sigman, M. S. Connecting and Analyzing Enantioselective Bifunctional Hydrogen Bond Donor Catalysis Using Data Science Tools. J. Am. Chem. Soc. 2020, 142 (38), 16382–16391. https://doi.org/10.1021/jacs.0c06905.
	Success Cutoff: ee = 85%
														MLoR Model Validation			Val BS = 0.04
Reaction	ee	∆∆G	True Class	Probability	PEOE1	Polarizability	NBO (X)	B5 (avg)	i(N-H)-Achiral	NBO (N)-Chiral	NBO (H)-Chiral	B1 (N-Achiral)		TS Class	Predicted Probability		VS Class	Predicted Probability
Rxn1	4.0196	0.05	1	0.000889712	0	125.204	-0.56568	5.37	15.1597	-0.61293	0.41924	2.35		1	2.37627e-34		0	1
Rxn2	92.055	1.98	0	0.992549	0	180.206	-0.56562	6.35	55.7523	-0.59742	0.38093	3.14		0	1		0	1
Rxn3	89.9952	1.83	0	0.97758	0	139.218	-0.56562	6.35	55.7523	-0.59742	0.38093	3.14		0	1		0	1
Rxn4	93.9925	2.16	0	0.979025	0	141.717	-0.56562	6.35	55.7523	-0.59742	0.38093	3.14		0	1		1	1
Rxn5	89.9952	1.83	0	0.981214	0	145.843	-0.56562	6.35	55.7523	-0.59742	0.38093	3.14		0	1		0	1
Rxn6	89.9952	1.83	0	0.968162	0	125.991	-0.56562	6.35	55.7523	-0.59742	0.38093	3.14		0	1		0	1
Rxn7	93.9925	2.16	0	0.978883	0	141.464	-0.56562	6.35	55.7523	-0.59742	0.38093	3.14		0	1		1	1.05297e-39
Rxn8	63.8769	0.94	1	0.892237	0	78.2467	-0.56562	6.35	55.7523	-0.59742	0.38093	3.14		1	1.02074e-40		1	5.9375e-31
Rxn9	92.055	1.98	0	0.953268	0	111.338	-0.56562	6.35	55.7523	-0.59742	0.38093	3.14		1	5.9375e-31		1	1.15149e-30
Rxn10	93.9925	2.16	0	0.975735	0	136.246	-0.56562	6.35	55.7523	-0.59742	0.38093	3.14		1	5.9375e-31		1	1.82203e-30
Rxn11	93.9925	2.16	0	0.967494	0	125.204	-0.56562	6.35	55.7523	-0.59742	0.38093	3.14		1	1.67425e-31		1	5.9375e-31
Rxn12	96.0049	2.42	0	0.982704	0	148.932	-0.56562	6.35	55.7523	-0.59742	0.38093	3.14		1	1.24473e-35		1	1.04062e-32
Rxn13	92.055	1.98	0	0.940342	0	101.875	-0.56562	6.35	55.7523	-0.59742	0.38093	3.14		1	5.9375e-31		1	3.5285e-27
Rxn14	5.09886	0.06	1	0.000412548	0	117.432	-0.51938	5.66	15.7355	-0.62499	0.42879	2.35		1	1.82203e-30		1	1.08381e-26
Rxn15	12.6895	0.15	1	0.000489582	0	117.432	-0.51938	5.66	16.2408	-0.62359	0.42789	2.35		1	9.20348e-27		1	5.6461e-12
Rxn16	14.3594	0.17	1	0.00164276	0	117.432	-0.51938	5.66	15.1597	-0.61293	0.41924	2.35		1	2.92693e-13		1	0.890206
Rxn17	52.1482	0.68	1	0.00164276	0	117.432	-0.51938	5.66	15.1597	-0.61293	0.41924	2.35		1	0.929993		1	8.77235e-30
Rxn18	61.7387	0.71	1	0.00164276	0	117.432	-0.51938	5.66	15.1597	-0.61293	0.41924	2.35		1	8.63938e-14		1	3.29817e-30
Rxn19	64.7818	0.76	1	0.00167215	0	117.432	-0.51938	5.66	14.1052	-0.61463	0.41904	2.34		1	5.13687e-30		1	1.64368e-29
Rxn20	69.25	0.84	1	0.00149858	0	117.432	-0.51938	5.66	14.4449	-0.61353	0.41963	2.34		1	3.50884e-30		1	1.83369e-13
Rxn21	71.7067	1.06	1	0.00756956	0	117.432	-0.51938	5.66	14.0985	-0.61406	0.41943	1.7		1	1.14148e-30		1	1.67413e-31
Rxn22	25.7725	0.31	1	0.00202035	25.413	117.432	-0.51938	5.66	15.1597	-0.61293	0.41924	2.35		1	5.5746e-14		0	3.6779e-14
Rxn23	45.009	0.57	1	0.00164276	0	117.432	-0.51938	5.66	15.1597	-0.61293	0.41924	2.35		0	0.504662		0	1.0856e-14
Rxn24	27.3535	0.33	1	0.00164276	0	117.432	-0.51938	5.66	15.1597	-0.61293	0.41924	2.35		0	0.625366		0	7.09473e-13
Rxn25	43.5755	0.46	1	0.00177545	9.54	117.432	-0.51938	5.66	15.1597	-0.61293	0.41924	2.35		1	0.680062		0	0.976816
Rxn26	79.9197	1.08	1	0.00756956	0	117.432	-0.51938	5.66	14.0985	-0.61406	0.41943	1.7		0	0.437092		0	0.999705
Rxn27	75.943	0.98	1	0.0154693	0	117.432	-0.51684	5.97	14.0985	-0.61406	0.41943	1.7		0	0.999705		0	0.999705
Rxn28	71.7999	0.89	1	0.0168635	0	117.432	-0.52152	6.015	14.0985	-0.61406	0.41943	1.7		0	0.999705		0	0.983417
Rxn29	83.9124	1.2	1	0.0170309	0	117.432	-0.52871	6.03	14.0985	-0.61406	0.41943	1.7		0	0.999705		0	0.983417
Rxn30	74.1706	0.94	1	0.249509	0	117.432	-0.51683	7.295	14.0985	-0.61406	0.41943	1.7		0	0.983417		0	0.999702
Rxn31	74.1706	0.94	1	0.30694	0	117.432	-0.51041	7.41	14.0985	-0.61406	0.41943	1.7		0	0.907937		0	0.999986
Rxn32	75.0703	0.96	1	0.869149	0	117.432	-0.51676	8.595	14.0985	-0.61406	0.41943	1.7		0	0.999992		0	0.999645
Rxn33	75.943	0.98	1	0.863675	0	117.432	-0.51712	8.575	14.0985	-0.61406	0.41943	1.7		0	0.99921		0	0.999951
Rxn34	74.1706	0.94	1	0.228335	0	117.432	-0.51722	7.245	14.0985	-0.61406	0.41943	1.7		0	0.999939		0	0.999528
Rxn35	78.01	1.03	1	0.0151467	0	143.17	-0.51938	5.66	14.0985	-0.61406	0.41943	1.7		0	0.99678		0	0.99853
Rxn36	82.0156	1.14	1	0.0119676	0	134.406	-0.51938	5.66	14.0985	-0.61406	0.41943	1.7		0	0.999963		0	0.999977
Rxn37	80.9935	1.11	1	0.00984181	0	127.15	-0.51938	5.66	14.0985	-0.61406	0.41943	1.7		0	0.999273		0	0.999932
Rxn38	75.0703	0.96	1	0.0101147	0	128.164	-0.51938	5.66	14.0985	-0.61406	0.41943	1.7		0	0.999861		0	0.999942
Rxn39	75.943	0.98	1	0.0199471	0	153.453	-0.51938	5.66	14.0985	-0.61406	0.41943	1.7		0	0.999909		1	5.51281e-23
Rxn40	82.0156	1.14	1	0.00615274	0	109.774	-0.51938	5.66	14.0985	-0.61406	0.41943	1.7		1	9.77652e-32		1	0.105237
Rxn41	78.01	1.03	1	0.212504	0	109.774	-0.51683	7.295	14.0985	-0.61406	0.41943	1.7		1	0.105237		1	0.00205709
Rxn42	78.01	1.03	1	0.136907	0	90.2747	-0.51683	7.295	14.0985	-0.61406	0.41943	1.7		1	0.00034268		1	0.105237
Rxn43	65.9446	0.78	1	0.0026218	0	78.3375	-0.51938	5.66	14.0985	-0.61406	0.41943	1.7		1	0.105237		1	0.105237
Rxn44	88.9857	1.4	0	0.116418	0	83.4641	-0.51683	7.295	14.0985	-0.61406	0.41943	1.7		1	0.0890439		1	0.620631
Rxn45	91.0921	1.51	0	0.715164	0	83.4641	-0.51712	8.575	14.0985	-0.61406	0.41943	1.7		0	0.647889		1	0.209832
Rxn46	88.1093	1.36	0	0.10496	0	83.4641	-0.51722	7.245	14.0985	-0.61406	0.41943	1.7		1	0.104366		1	0.43356
Rxn47	85.8934	1.27	0	0.7247	0	83.4641	-0.51676	8.595	14.0985	-0.61406	0.41943	1.7		1	0.375392		0	0.270159
Rxn48	88.9857	1.4	0	0.14931	0	83.4641	-0.51041	7.41	14.0985	-0.61406	0.41943	1.7		1	0.202793		1	0.817623
Rxn49	81.144	1.33	1	0.93007	0	117.432	2.19979	6.29	11.7655	-0.58895	0.42233	2.43		0	0.361539		1	4.72033e-30
Rxn50	88.0478	1.62	0	0.924279	0	117.432	2.19979	6.29	11.3258	-0.58922	0.42263	2.43		1	8.16558e-40		0	0.322726
Rxn51	94.9697	2.15	0	0.939344	0	117.432	2.19979	6.29	11.3598	-0.59043	0.4214	2.44		0	0.742779		0	0.573273
Rxn52	96.0144	2.29	0	0.980223	0	117.432	2.19979	6.29	10.2775	-0.59249	0.42033	2.04		1	0.527536		0	0.507535
Rxn53	97.0066	2.27	0	0.980223	0	117.432	2.19979	6.29	10.2775	-0.59249	0.42033	2.04		0	0.696435		1	0.00995726
Rxn54	97.9996	2.4	0	0.980223	0	117.432	2.19979	6.29	10.2775	-0.59249	0.42033	2.04		1	0.0416019		1	0.229896
Rxn55	98.3937	2.42	0	0.980223	0	117.432	2.19979	6.29	10.2775	-0.59249	0.42033	2.04		1	0.140638		0	0.903267
Rxn56	93.9658	2.04	0	0.980223	0	117.432	2.19979	6.29	10.2775	-0.59249	0.42033	2.04		0	0.903267		0	0.903267
Rxn57	93.0024	1.95	0	0.981676	9.54	117.432	2.19979	6.29	10.2775	-0.59249	0.42033	2.04		0	0.903267		0	0.999973
Rxn58	93.9658	2.04	0	0.981676	9.54	117.432	2.19979	6.29	10.2775	-0.59249	0.42033	2.04		0	0.999973		0	0.998619
Rxn59	93.0024	1.95	0	0.981676	9.54	117.432	2.19979	6.29	10.2775	-0.59249	0.42033	2.04		0	0.999939		0	9.23876e-06
Rxn60	89.9853	1.73	0	0.982287	13.772	117.432	2.19979	6.29	10.2775	-0.59249	0.42033	2.04		0	0.991674		0	0.999625
Rxn61	99.0002	2.87	0	0.980143	0	117.28	2.19979	6.29	10.2775	-0.59249	0.42033	2.04		0	0.999729		0	0.999239
Rxn62	99.0002	2.87	0	0.996041	0	177.053	2.19979	6.29	10.2775	-0.59249	0.42033	2.04		0	0.999713		0	0.996313
Rxn63	97.0066	2.27	0	0.994909	0	167.782	2.19979	6.29	10.2775	-0.59249	0.42033	2.04		0	0.999788		0	0.990233
Rxn64	97.0066	2.27	0	0.969647	0	101.312	2.19979	6.29	10.2775	-0.59249	0.42033	2.04		0	0.999251		1	1.03943e-14
Rxn65	97.0066	2.27	0	0.978557	0	114.402	2.19979	6.29	10.2775	-0.59249	0.42033	2.04		1	1.13115e-12		1	4.33958e-13
Rxn66	99.0002	2.87	0	0.990093	0	143.17	2.19979	6.29	10.2775	-0.59249	0.42033	2.04		1	5.94708e-13		1	1.1969e-14
Rxn67	97.0066	2.27	0	0.991051	0	146.938	2.19979	6.29	10.2775	-0.59249	0.42033	2.04		1	1.1062e-12		1	5.5542e-18
Rxn68	95.0331	1.99	0	0.944594	0	78.2658	2.19979	6.29	10.2775	-0.59249	0.42033	2.04		1	7.09943e-12		1	9.22218e-10
Rxn69	97.0066	2.27	0	0.975745	0	109.774	2.19979	6.29	10.2775	-0.59249	0.42033	2.04		1	1.80159e-07		1	3.18551e-21
Rxn70	97.995	2.49	0	0.992076	0	151.439	2.19979	6.29	10.2775	-0.59249	0.42033	2.04		1	6.29957e-22		1	1.21421e-21
Rxn71	95.9996	2.11	0	0.960331	0	91.1343	2.19979	6.29	10.2775	-0.59249	0.42033	2.04		1	5.20407e-32		1	1.13225e-23
Rxn72	95.9996	2.11	0	0.970721	0	102.675	2.19979	6.29	10.2775	-0.59249	0.42033	2.04		1	1.30768e-26		1	6.83469e-21
Rxn73	95.9996	2.11	0	0.993588	0	159.267	2.19979	6.29	10.2775	-0.59249	0.42033	2.04		1	1.44495e-14		1	3.58818e-19
Rxn74	97.0066	2.27	0	0.985789	0	129.769	2.19979	6.29	10.2775	-0.59249	0.42033	2.04		1	7.32903e-20		1	5.50133e-22
Rxn75	97.995	2.49	0	0.989664	0	141.599	2.19979	6.29	10.2775	-0.59249	0.42033	2.04		1	1.07732e-19		1	1.79598e-18
Rxn76	97.0066	2.27	0	0.988191	0	136.654	2.19979	6.29	10.2775	-0.59249	0.42033	2.04
Rxn77	97.0066	2.27	0	0.99035	0	144.145	2.19979	6.29	10.2775	-0.59249	0.42033	2.04
Rxn78	44.3281	0.56	1	0.00909962	0	117.432	-0.55559	6.46	15.1597	-0.61293	0.41924	2.35
Rxn79	40.8475	0.51	1	0.0027262	0	117.432	-0.55559	6.46	16.2408	-0.62359	0.42789	2.35
Rxn80	83.0817	1.4	1	0.0953626	0	117.432	-0.55559	6.46	8.4379	-0.54886	0.39216	2.44
Rxn81	66.8497	0.95	1	0.0953626	0	117.432	-0.55559	6.46	8.4379	-0.54886	0.39216	2.44
Rxn82	55.1755	0.73	1	0.10229	9.54	117.432	-0.55559	6.46	8.4379	-0.54886	0.39216	2.44
Rxn83	63.9299	0.89	1	0.105503	13.772	117.432	-0.55559	6.46	8.4379	-0.54886	0.39216	2.44
Rxn84	79.0097	1.26	1	0.0953626	0	117.432	-0.55559	6.46	8.4379	-0.54886	0.39216	2.44
Rxn85	80.9333	1.22	1	0.0953626	0	117.432	-0.55559	6.46	8.4379	-0.54886	0.39216	2.44
Rxn86	79.8558	1.1	1	0.0953626	0	117.432	-0.55559	6.46	8.4379	-0.54886	0.39216	2.44
Rxn87	77.0134	1.2	1	0.0884742	0	114.402	-0.55559	6.46	8.4379	-0.54886	0.39216	2.44
Rxn88	83.0817	1.4	1	0.254429	0	160.544	-0.55559	6.46	8.4379	-0.54886	0.39216	2.44
Rxn89	91.0593	1.8	0	0.264506	0	162.469	-0.55559	6.46	8.4379	-0.54886	0.39216	2.44
Rxn90	72.1174	1.07	1	0.0950059	0	117.28	-0.55559	6.46	8.4379	-0.54886	0.39216	2.44
Rxn91	81.9977	1.36	1	0.131651	0	130.769	-0.55559	6.46	8.4379	-0.54886	0.39216	2.44
Rxn92	81.9977	1.36	1	0.179171	0	144.145	-0.55559	6.46	8.4379	-0.54886	0.39216	2.44
Rxn93	83.0817	1.4	1	0.195593	0	148.105	-0.55559	6.46	8.4379	-0.54886	0.39216	2.44
Rxn94	74.854	1.14	1	0.129473	0	130.065	-0.55559	6.46	8.4379	-0.54886	0.39216	2.44
Rxn95	87.0554	1.57	0	0.149537	0	136.208	-0.55559	6.46	8.4379	-0.54886	0.39216	2.44
Rxn96	55.7643	0.74	1	0.348579	0	177.053	-0.55559	6.46	8.4379	-0.54886	0.39216	2.44
Rxn97	88.0478	1.62	0	0.175297	0	143.17	-0.55559	6.46	8.4379	-0.54886	0.39216	2.44
Rxn98	21.7607	0.26	1	0.00052438	9.54	117.432	-0.08	4.48	15.1597	-0.61293	0.41924	2.35
Rxn99	67.8483	0.64	1	0.00247107	9.54	117.432	-0.08	4.48	19.1654	-0.6494	0.41702	2.43
Rxn100	89.9928	1.14	0	0.456061	9.54	117.432	-0.08	4.48	15.3106	-0.61711	0.38947	1.65
Rxn101	96.0284	1.51	0	0.651983	9.54	146.938	-0.08	4.48	15.3106	-0.61711	0.38947	1.65
Rxn102	84.8943	0.97	1	0.550765	9.54	131.377	-0.08	4.48	15.3106	-0.61711	0.38947	1.65
Rxn103	90.9303	1.18	0	0.571089	9.54	134.406	-0.08	4.48	15.3106	-0.61711	0.38947	1.65
Rxn104	93.0955	1.29	0	0.628339	9.54	143.17	-0.08	4.48	15.3106	-0.61711	0.38947	1.65
Rxn105	94.057	1.35	0	0.541905	9.54	130.065	-0.08	4.48	15.3106	-0.61711	0.38947	1.65
Rxn106	78.0161	0.81	1	0.130355	9.54	54.249	-0.08	4.48	15.3106	-0.61711	0.38947	1.65
Rxn107	79.9572	0.85	1	0.223515	9.54	78.1967	-0.08	4.48	15.3106	-0.61711	0.38947	1.65
Rxn108	84.1571	0.95	1	0.404951	9.54	109.774	-0.08	4.48	15.3106	-0.61711	0.38947	1.65
Rxn109	77.9801	1.05	1	0.656831	9.54	117.432	-0.33635	8.42	15.1597	-0.61293	0.41924	2.35
Rxn110	89.0224	1.43	0	0.639084	0	117.432	-0.33635	8.42	15.1597	-0.61293	0.41924	2.35
Rxn111	87.0089	1.34	0	0.639084	0	117.432	-0.33635	8.42	15.1597	-0.61293	0.41924	2.35
Rxn112	93.0463	1.67	0	0.639084	0	117.432	-0.33635	8.42	15.1597	-0.61293	0.41924	2.35
Rxn113	94.9924	1.84	0	0.639084	0	117.432	-0.33635	8.42	15.1597	-0.61293	0.41924	2.35
Rxn114	99.0007	2.66	0	0.96377	0	117.432	-0.33635	8.42	55.6093	-0.61361	0.42447	2.28
Rxn115	92.0482	1.6	0	0.96377	0	117.432	-0.33635	8.42	55.6093	-0.61361	0.42447	2.28
Rxn116	96.0351	1.96	0	0.960885	0	117.432	-0.33944	8.39	55.6093	-0.61361	0.42447	2.28
Rxn117	94.0393	1.75	0	0.948379	0	117.432	-0.33006	8.25	55.6093	-0.61361	0.42447	2.28
Rxn118	92.0482	1.6	0	0.93757	0	117.432	-0.36894	8.22	55.6093	-0.61361	0.42447	2.28
Rxn119	87.9431	1.38	0	0.764768	0	117.432	-0.33131	7.5	55.6093	-0.61361	0.42447	2.28
Rxn120	91.0846	1.54	0	0.974387	0	144.145	-0.33006	8.25	55.6093	-0.61361	0.42447	2.28
Rxn121	94.9924	1.84	0	0.970473	0	138.779	-0.33006	8.25	55.6093	-0.61361	0.42447	2.28
Rxn122	90.0103	1.48	0	0.973715	0	143.17	-0.33006	8.25	55.6093	-0.61361	0.42447	2.28
Rxn123	92.0482	1.6	0	0.959969	0	127.21	-0.33006	8.25	55.6093	-0.61361	0.42447	2.28
Rxn124	89.0224	1.43	0	0.976946	0	148.105	-0.33006	8.25	55.6093	-0.61361	0.42447	2.28
Rxn125	99.0007	2.66	0	0.922126	0	101.312	-0.33006	8.25	55.6093	-0.61361	0.42447	2.28
Rxn126	94.0393	1.75	0	0.960223	0	127.453	-0.33006	8.25	55.6093	-0.61361	0.42447	2.28
Rxn127	93.0463	1.67	0	0.884339	0	85.2589	-0.33006	8.25	55.6093	-0.61361	0.42447	2.28
Rxn128	84.656	1.25	1	0.47869	0	117.432	-0.59986	6.37	26.8542	-0.61649	0.41544	1.09
Rxn129	78.7481	1.07	1	0.149518	0	117.432	-0.59986	6.37	15.7438	-0.62308	0.41191	1.7
Rxn130	76.7826	1.02	1	0.127139	0	117.432	-0.59986	6.37	13.2268	-0.62257	0.41168	1.7
Rxn131	72.8466	0.93	1	0.0675966	0	117.432	-0.59986	6.37	13.3069	-0.62218	0.41123	2.01
Rxn132	77.3983	1.22	1	0.122462	0	117.432	-0.59986	6.37	17.1859	-0.61901	0.41323	1.7
Rxn133	61.0243	0.84	1	0.0724345	0	117.432	-0.59986	6.37	14.0342	-0.62153	0.41107	2.01
Rxn134	70.5512	1.04	1	0.0673253	0	117.432	-0.59986	6.37	13.8119	-0.61956	0.41531	1.7
Rxn135	44.7297	0.57	1	0.014635	0	117.432	-0.59986	6.37	15.498	-0.62476	0.41036	2.81
Rxn136	34.0497	0.42	1	0.0201865	0	117.432	-0.59986	6.37	17.9855	-0.62754	0.40948	2.86
Rxn137	66.9942	0.96	1	0.201221	0	117.432	-0.59986	6.37	22.3058	-0.61741	0.40797	2.01
Rxn138	74.1674	1.13	1	0.0586799	0	117.432	-0.59986	6.37	19.7747	-0.63315	0.4209	1.7
Rxn139	72.2076	1.08	1	0.0457068	0	117.432	-0.59986	6.37	16.5756	-0.63304	0.42082	1.7
Rxn140	70.9728	1.05	1	0.0240463	0	117.432	-0.59986	6.37	16.8684	-0.63285	0.42032	2.01
Rxn141	77.0575	1.21	1	0.00623893	0	117.432	-0.59986	6.37	5.6193	-0.63445	0.42693	1.7
Rxn142	72.2076	1.08	1	0.0188525	0	117.432	-0.59986	6.37	17.928	-0.63237	0.42209	2.01
Rxn143	81.1538	1.34	1	0.0224723	0	117.432	-0.59986	6.37	15.8825	-0.63025	0.42406	1.7
Rxn144	46.0704	0.59	1	0.00472924	0	117.432	-0.59986	6.37	19.2633	-0.63579	0.41979	2.82
Rxn145	84.8209	1.48	1	0.236464	0	117.432	-0.60347	7.18	21.9872	-0.59769	0.41803	1.7
Rxn146	82.8138	1.4	1	0.093275	0	117.432	-0.60347	7.18	13.597	-0.59621	0.41987	1.7
Rxn147	78.0666	1.24	1	0.0399966	0	117.432	-0.60347	7.18	11.9734	-0.59614	0.41979	2.01
Rxn148	79.9686	1.3	1	0.059141	0	117.432	-0.60347	7.18	12.2982	-0.59167	0.42126	1.7
Rxn149	55.4508	0.74	1	0.0771482	0	117.432	-0.60347	7.18	11.0676	-0.59456	0.41957	1.7
Rxn150	42.6806	0.54	1	0.0097984	0	117.432	-0.60347	7.18	18.1834	-0.5967	0.41915	2.85

## Sheet: IEE Diels-Alder
	Parameters extracted from:
	(1) Ravasco, J. M. J. M.; Coelho, J. A. S. Predictive Multivariate Models for Bioorthogonal Inverse-Electron Demand Diels–Alder Reactions. J. Am. Chem. Soc. 2020, 142 (9), 4235–4241. https://doi.org/10.1021/jacs.9b11948.
	Success Cutoff: k = 0.1
														MLoR Model Validation			Val BS = 0.08
Dienophile	Measured K	Predicted K	True Class	Probability	α2	dCC	B11	Λ	dCC	dCN	LL	ε		TS Class	Predicted Probability		VS Class	Predicted Probability
Rxn1	26	205	1	1.24215e-05	152.15	1.331	2.1595	18.213	2.567	1.349	5.4216	45.02		1	2.97261e-08		1	0.0634868
Rxn2	0.189	0.223	1	0.135902	160.38	1.337	2.1473	0.414	2.561	1.341	6.2897	42.28		1	0.000283729		0	0.357926
Rxn3	0.087	0.0841	0	0.408688	160.25	1.336	2.1381	-0.079	2.561	1.341	6.2897	32.6		1	0.000182783		1	0.22854
Rxn4	3.3	3.74	1	0.00840219	0	1.208	1.7864	0.728	2.574	1.343	6.5203	32.6		0	0.999989		0	0.954669
Rxn5	0.18	0.153	1	0.21083	160.38	1.337	2.1473	0.414	2.568	1.342	6.2903	55.57		1	0.000283729		1	0.00893261
Rxn6	9.9	4.35	1	0.00219547	148.93	1.332	1.8995	22.119	2.617	1.342	6.5137	57.59		1	0.00267382		1	1.94922e-10
Rxn7	0.0017	0.00588	0	0.999277	179.63	1.333	1.7798	-0.759	2.568	1.342	6.2903	55.57		0	0.999888		1	1.07595e-12
Rxn8	0.02	0.0112	0	0.87945	160.11	1.336	3.3652	0.064	2.561	1.341	6.2897	32.6		1	4.35731e-08		0	0.99951
Rxn9	2	3.18	1	0.0196551	149.1	1.331	1.9896	21.877	2.624	1.346	7.2554	57.59		1	2.9067e-09		1	1.8535e-13
Rxn10	3.6	3.74	1	0.00840219	0	1.208	1.7864	0.728	2.574	1.343	6.5203	32.6		0	0.999375		1	0.581636
Rxn11	601	531	1	1.31161e-06	152.15	1.331	2.1595	18.213	2.561	1.341	6.2897	45.02		1	1.20977e-08		1	0.0493661
Rxn12	2.6	1.8	1	0.0109884	149.57	1.332	1.9112	19.898	2.617	1.342	6.5137	57.59		1	1.38459e-06		1	0.000150621
Rxn13	5240	5120	1	4.50732e-08	152.5	1.332	1.814	19.856	2.559	1.341	6.2889	55.57		1	0.065753		0	0.0116712
Rxn14	0.00152	0.000694	0	0.998377	0	1.207	1.8376	-5.06	2.586	1.327	2.1094	2.21		1	5.15414e-10		1	1.71643e-14
Rxn15	31.5	64.3	1	1.52159e-05	152.15	1.331	2.1595	18.213	2.569	1.34	3.0419	58.4		1	8.63422e-14		1	0.000105565
Rxn16	0.00828	0.000298	0	0.997451	0	1.207	1.8376	-5.06	2.591	1.328	5.1385	2.21		1	1.39697e-09		1	3.71432e-14
Rxn17	29000	43700	1	9.67227e-09	152.82	1.333	1.7254	19.118	2.561	1.341	6.2891	78.54		1	4.26669e-10		1	1.911e-12
Rxn18	14.6	7.45	1	8.38441e-06	152.54	1.333	1.8555	19.609	2.559	1.344	5.1682	2.21		0	0.981863		1	2.1903e-15
Rxn19	0.35	0.215	1	0.350236	149.57	1.332	1.9112	19.898	2.633	1.337	5.8366	57.59		1	0.0145227		0	0.951437
Rxn20	0.0087	0.00841	0	0.991595	179.63	1.333	1.7798	-0.759	2.551	1.336	3.0392	55.57		1	0.16882		1	0.000269509
Rxn21	90	194	1	9.00231e-06	152.15	1.331	2.1595	18.213	2.567	1.347	5.8394	45.02		0	0.998769		1	0.085081
Rxn22	0.49	0.713	1	0.0875487	157.61	1.332	2.8708	0.482	2.561	1.341	6.2897	76.24		1	1.87263e-09		0	0.956889
Rxn23	44.8	23.6	1	0.000420232	0	1.208	1.7864	0.728	2.561	1.341	6.2897	32.6		1	0.125673		1	5.10235e-10
Rxn24	2.7	4.05	1	0.00631569	0	1.208	1.7864	0.728	2.574	1.343	7.0429	32.6		0	0.648249		0	1
Rxn25	0.0423	0.0379	0	0.282045	179.63	1.333	1.7798	-0.759	2.508	1.335	3.4643	2.21		1	0.00269021		1	2.20798e-08
Rxn26	0.79	2.46	1	0.0792348	152.15	1.331	2.1595	18.213	2.605	1.334	2.2557	57.59		0	0.999002		1	0.000178433
Rxn27	17200	8280	1	4.28422e-09	152.5	1.332	1.814	19.856	2.549	1.34	6.2347	55.57		1	5.4032e-05		0	1
Rxn28	318	314	1	1.58788e-06	149.1	1.331	1.9896	21.877	2.572	1.347	6.351	32.6		0	0.929414		0	0.896103
Rxn29	1.7	1.14	1	0.00295301	160.38	1.337	2.1473	0.414	2.549	1.34	6.2347	55.57		1	0.0273557		1	6.90725e-09
Rxn30	26000	24600	1	5.50331e-09	152.5	1.332	1.814	19.856	2.55	1.334	2.0843	78.54		1	9.47184e-05		1	1.38459e-06
Rxn31	22000	7420	1	4.57719e-09	152.5	1.332	1.814	19.856	2.558	1.339	6.2354	78.54		0	0.509146		1	4.99375e-10
Rxn32	255	269	1	2.65256e-06	149.1	1.331	1.9896	21.877	2.574	1.348	6.3516	32.6		1	0.000534561		0	1
Rxn33	5300	1880	1	4.5964e-08	152.5	1.332	1.814	19.856	2.568	1.339	6.2906	78.54		0	0.999955		1	1.27694e-10
Rxn34	690	288	1	1.92045e-06	149.1	1.331	1.9896	21.877	2.574	1.343	6.5203	32.6		1	5.97317e-08		1	8.06744e-05
Rxn35	0.03	0.0112	0	0.931525	0	1.208	2.0047	-0.202	2.597	1.327	2.0851	40.83		1	6.22967e-13		0	0.995812
Rxn36	310000	72100	1	6.30568e-10	149.04	1.333	2.1015	22.203	2.56	1.341	6.2889	78.54		0	0.998267		0	0.918294
Rxn37	1.4	0.368	1	0.0473522	160.38	1.337	2.1473	0.414	2.561	1.341	6.2897	55.57		1	4.1547e-12		1	0.0570221
Rxn38	0.0207	0.00832	0	0.9196	0	1.207	1.8376	-5.06	2.576	1.343	6.442	2.21		1	1.27694e-10		1	4.97494e-08
Rxn39	9.34	10.5	1	0.00268429	149.1	1.331	1.9896	21.877	2.606	1.334	2.2556	57.59		1	2.10771e-11		1	1.22705e-09
Rxn40	0.126	0.104	1	0.667207	176.82	1.333	1.52	0	2.527	1.336	5.0022	2.21		0	0.999757		1	0.000530767
Rxn41	0.00279	0.00265	0	0.995034	0	1.207	1.8376	-5.06	2.582	1.323	2.114	2.21		1	1.22794e-09		1	1.73508e-08
Rxn42	0.131	0.0864	1	0.0998645	109.83	1.298	1.7	0	2.575	1.338	4.3268	58.4		1	2.08488e-08		1	0.000336209
Rxn43	470	158	1	4.36778e-06	149.57	1.332	1.9112	19.898	2.574	1.343	6.5203	32.6		0	1		0	0.919994
Rxn44	0.031	0.11	0	0.872153	158.77	1.334	4.849	1.215	2.546	1.334	2.0842	46.3		1	0.631951		1	1.20037e-06
Rxn45	1140	278	1	2.7117e-06	152.15	1.331	2.1595	18.213	2.561	1.341	6.2897	36.64		1	1.99231e-09		0	1
Rxn46	0.74	0.367	1	0.0998008	108.46	1.293	2.4716	0	2.566	1.339	3.0414	78.54		0	0.994334		1	6.53483e-13
Rxn47	0.051	0.104	0	0.632285	108	1.289	3.6218	0	2.561	1.341	6.2897	57.59		1	2.19768e-12		1	1.20037e-06
Rxn48	0.00054	0.0011	0	0.999808	177.03	1.33	1.7	0.553	2.569	1.342	3.0426	55.57		1	0.000416653		0	0.99456
Rxn49	40.9	60.5	1	3.99517e-05	0	1.208	1.7864	0.728	2.551	1.34	6.2358	32.6		1	6.40314e-10		1	7.77374e-15
Rxn50	6.4	3.8	1	0.00894955	148.93	1.332	1.8995	22.119	2.624	1.346	7.2554	57.59		1	2.1998e-10		1	6.31013e-08
Rxn51	1.2	5.11	1	0.00593473	0	1.208	1.7864	0.728	2.574	1.343	6.5203	36.64		0	0.987089		1	0.00504962
Rxn52	0.0042	0.0473	0	0.9911	177.34	1.33	1.7011	0.969	2.561	1.341	6.2897	55.57		1	3.02165e-08		1	6.96358e-10
Rxn53	20.2	30.2	1	0.000958659	148.93	1.332	1.8995	22.119	2.605	1.334	2.2557	57.59		1	0.0143753		0	0.953338
Rxn54	0.000922	0.00171	0	1	0	1.207	1.8376	-5.06	2.669	1.297	6.52	2.21		0	0.998974		0	1
Rxn55	0.073	0.0124	0	0.839431	160.17	1.337	3.378	0.026	2.561	1.341	6.2897	32.6		0	0.964314		1	8.41348e-08
Rxn56	0.019	0.0735	0	0.749196	178.98	1.335	1.7833	-0.519	2.547	1.334	2.0841	78.54		1	0.0771537		0	0.465905
Rxn57	5.12	4.64	1	1.66536e-05	152.54	1.333	1.8555	19.609	2.563	1.342	5.4527	2.21		1	1.98676e-08		1	1.73821e-14
Rxn58	0.15	0.376	1	0.0879675	109.35	1.296	3.3568	0	2.561	1.341	6.2897	57.59		1	2.08154e-12		1	0.00888256
Rxn59	118	23.6	1	0.000420232	0	1.208	1.7864	0.728	2.561	1.341	6.2897	32.6		1	0.699632		1	0.11355
Rxn60	1.4	5.53	1	0.00445821	0	1.208	1.7864	0.728	2.574	1.343	7.0429	36.64		0	0.986608		1	0.116162
Rxn61	43	711	1	1.23139e-06	152.5	1.332	1.814	19.856	2.567	1.347	5.8394	45.02		1	8.11418e-10		1	0.432535
Rxn62	0.035	0.066	0	0.505511	109.21	1.295	4.3439	0	2.561	1.341	6.2897	57.59		1	0.141036		1	9.27013e-08
Rxn63	0.58	2.58	1	0.0124819	0	1.208	1.7864	0.728	2.577	1.344	7.1514	32.6		1	1.79227e-09		0	0.888816
Rxn64	0.00139	0.00189	0	1	0	1.207	1.8376	-5.06	2.668	1.297	6.4102	2.21		0	0.951437		0	0.991967
Rxn65	2000	380	1	8.64993e-07	148.93	1.332	1.8995	22.119	2.574	1.343	6.5203	32.6		0	0.999781		1	9.42435e-12
Rxn66	0.021	0.0129	0	0.99841	178.51	1.333	1.8312	-2.703	2.561	1.341	6.2897	55.57		1	1.53787e-08		0	0.999233
Rxn67	1.58	2.61	1	4.79327e-05	152.54	1.333	1.8555	19.609	2.567	1.345	5.4813	2.21		1	5.83295e-08		1	4.67778e-14
Rxn68	24.5	13.9	1	0.00121082	148.93	1.332	1.8995	22.119	2.606	1.334	2.2556	57.59		0	0.999997		0	1
Rxn69	0.041	0.00348	0	0.973036	159.36	1.335	4.1606	0.311	2.561	1.341	6.2897	32.6		0	1		0	0.921094
Rxn70	22000	2450	1	4.29167e-08	148.93	1.332	1.8995	22.119	2.561	1.341	6.2897	32.6		1	2.0096e-13		1	1.09874e-09
Rxn71	0.081	0.0222	0	0.979904	177.5	1.328	1.52	-2.201	2.547	1.334	2.0841	78.54		1	8.41348e-08		1	0.0484339
Rxn72	0.014	0.00684	0	0.840888	108	1.289	3.6218	0	2.566	1.34	6.2892	57.59		1	1.74058e-12		1	0.170872
Rxn73	4.55	0.467	1	0.0855412	160.17	1.337	3.2592	0.025	2.561	1.341	6.2897	76.24		1	5.85093e-09		1	0.40526
Rxn74	79200	3910	1	7.1814e-08	152.15	1.331	2.1595	18.213	2.561	1.341	6.2891	78.54		0	0.966591		1	5.90168e-05
Rxn75	1.3	3.11	1	4.6057e-05	152.54	1.333	1.8555	19.609	2.567	1.344	5.4702	2.21		1	0.010241		0	1
Rxn76	3100	380	1	8.64993e-07	148.93	1.332	1.8995	22.119	2.574	1.343	6.5203	32.6		1	0.00118851		1	1.715e-13
Rxn77	12	750	1	1.69909e-06	152.5	1.332	1.814	19.856	2.567	1.349	5.4216	45.02		1	2.37292e-07		1	0.0865928
Rxn78	173	550	1	3.71044e-07	152.5	1.332	1.814	19.856	2.561	1.341	6.2891	36.64		1	3.39536e-13		1	0.116367
Rxn79	0.000286	0.000809	0	0.997446	0	1.207	1.8376	-5.06	2.584	1.327	2.0854	2.21		0	0.999993		0	0.999781
Rxn80	2.25	0.118	1	0.0499827	176.82	1.333	1.52	0	2.508	1.335	3.4643	2.21		1	9.03791e-08		1	2.84246e-10
Rxn81	8	690	1	1.69965e-06	152.5	1.332	1.814	19.856	2.567	1.349	5.421	45.02		1	0.00199496		1	0.0346651
Rxn82	15.2	55.2	1	1.30467e-05	152.6	1.331	3.1932	18.129	2.563	1.335	3.0408	68.07		1	0.00657459		1	4.82651e-08
Rxn83	14	52	1	1.44922e-05	152.54	1.331	3.1894	17.91	2.563	1.335	3.0408	68.07		0	0.975798		1	4.32691e-11
Rxn84	0.36	3.53	1	0.00882704	0	1.208	1.7864	0.728	2.577	1.344	7.1514	36.64		1	0.0349795		1	3.30786e-13
Rxn85	0.0028	0.0131	0	0.862693	109.21	1.295	4.3439	0	2.561	1.341	6.2897	36.64		1	0.000235034		0	0.0116712
Rxn86	1.24e-05	1.46e-05	0	0.999984	0	1.207	1.8376	-5.06	2.606	1.325	2.0937	2.21		0	0.778441		1	1.68858e-13
Rxn87	0.254	0.124	1	0.890853	179.82	1.334	1.8758	0	2.527	1.336	5.0022	2.21		1	0.00137086		1	0.00014332
Rxn88	1.21	104	1	6.04804e-05	146.96	1.34	3.2651	1.516	2.55	1.334	2.0841	74.76		1	0.0267757		1	0.00213662
Rxn89	11	332	1	2.98982e-06	152.5	1.332	1.814	19.856	2.572	1.347	6.351	45.02		0	0.999985		0	1
Rxn90	0.00361	0.00155	0	1	0	1.207	1.8376	-5.06	2.67	1.297	6.6203	2.21		0	0.0557348		0	0.995451
Rxn91	0.0011	0.00194	0	0.988934	0	1.207	1.8376	-5.06	2.579	1.322	2.2234	2.21		1	0.440209		1	1.04292e-08
Rxn92	167000	6000	1	2.95973e-08	149.57	1.332	1.9112	19.898	2.561	1.341	6.2897	55.57		1	0.0380528		1	5.76332e-06
Rxn93	135000	14600	1	4.66628e-08	152.39	1.332	2.1299	18.3	2.561	1.341	6.2891	78.54		1	4.71683e-15		1	0.0950941
Rxn94	0.688	36.8	1	6.04804e-05	146.96	1.34	3.2651	1.516	2.55	1.334	2.0841	74.76		1	2.16901e-08		0	0.863495
Rxn95	0.000711	0.00298	0	0.989135	0	1.207	1.8376	-5.06	2.579	1.322	2.1897	2.21		0	0.999425		1	2.6346e-10
Rxn96	0.3	0.834	1	0.00423404	148.93	1.332	1.8995	22.119	2.62	1.339	6.3397	57.59		1	0.0285429		0	0.796051
Rxn97	2800000	123000	1	1.46394e-09	148.92	1.331	1.9931	22.099	2.561	1.341	6.2891	78.54		1	0.451061		1	2.61574e-14
Rxn98	9.4	315	1	1.54567e-06	152.59	1.331	2.1595	18.174	2.563	1.335	3.0408	68.07		1	6.35513e-15		1	4.19567e-08
Rxn99	0.54	18.4	1	4.38832e-05	152.82	1.331	2.336	17.881	2.563	1.335	3.0408	36.64		0	0.813953		1	1.28231e-09
Rxn100	1.14	17.5	1	5.10428e-06	0	1.207	1.8376	-5.06	2.508	1.335	3.4643	2.21		1	3.13519e-05		0	0.196082
Rxn101	2.03	0.286	1	0.0159938	152.54	1.333	1.8555	19.609	2.585	1.351	3.0402	2.21		1	0.0368307		1	0.0044693
Rxn102	0.000239	0.00631	0	0.982961	0	1.207	1.8376	-5.06	2.577	1.321	2.0857	2.21		0	0.991359		1	2.26924e-05
Rxn103	0.37	15.5	1	4.12079e-05	151.51	1.333	4.7668	20.721	2.561	1.341	6.2897	36.64		1	1.29189e-10		1	0.192324
Rxn104	273000	860	1	2.19188e-06	152.74	1.331	4.2203	19.817	2.561	1.341	6.2891	78.54		1	2.14375e-07		1	0.171318
Rxn105	0.03	0.0206	0	0.913554	108	1.289	3.6218	0	2.561	1.341	6.2897	36.64		1	1.04174e-06		1	0.0159748
Rxn106	0.288	0.513	1	0.0279538	109.83	1.298	1.7	0	2.566	1.339	3.0414	58.4		1	0.000216751		0	0.950872
Rxn107	0.005	0.00189	0	0.988378	160.45	1.336	4.3522	-0.467	2.561	1.341	6.2897	32.6		0	0.818727		1	1.74427e-05
Rxn108	6.9e-05	5.51e-05	0	0.999988	0	1.207	1.8376	-5.06	2.612	1.336	5.0133	2.21		1	0.16882		0	0.920052
Rxn109	29.7	15.8	1	0.00019447	0	1.207	1.8376	-5.06	2.527	1.336	5.0022	2.21		0	0.95544		1	1.91754e-05
Rxn110	0.011	0.0078	0	0.892237	160.83	1.338	3.7448	0.222	2.561	1.341	6.2897	32.6		1	0.430841		0	0.999996
Rxn111	0.0926	0.0117	0	0.693626	0	1.207	1.8376	-5.06	2.572	1.343	7.6868	2.21		0	0.920052		1	3.20318e-14
Rxn112	0.43	0.375	1	0.103369	160.13	1.337	3.3691	0.025	2.561	1.341	6.2897	76.24		1	0.00118178		0	0.997923
Rxn113	30000	407000	1	2.16095e-09	152.5	1.332	1.814	19.856	2.546	1.334	2.0842	78.54		0	0.999781		1	0.362915
Rxn114	21	235	1	9.82297e-06	152.15	1.331	2.1595	18.213	2.566	1.349	5.4234	45.02		1	8.24417e-09		0	0.237685
Rxn115	1.9	0.78	1	0.0301144	148.93	1.332	1.8995	22.119	2.629	1.336	6.2982	57.59		0	0.979258		1	4.1547e-12
Rxn116	6360	1860	1	9.52834e-08	149.1	1.331	1.9896	21.877	2.561	1.341	6.2897	32.6		1	1.60468e-05		0	1
Rxn117	1.3	0.383	1	0.137035	160.38	1.336	3.3443	0.227	2.561	1.341	6.2897	76.24		1	1.7955e-13		1	8.20107e-10
Rxn118	0.2	0.0993	1	0.411401	107.41	1.291	3.1662	0	2.566	1.339	3.0414	78.54		1	0.121283		1	1.69999e-12
Rxn119	0.56	0.322	1	0.135535	149.57	1.332	1.9112	19.898	2.629	1.336	6.2982	57.59		0	0.136487		1	0.978878
Rxn120	0.0389	0.00966	0	0.872363	109.34	1.295	4.3105	0	2.566	1.339	3.0414	68.47		1	0.0398357		0	1
Rxn121	820	204	1	3.84868e-06	152.15	1.331	2.1595	18.213	2.561	1.341	6.2897	32.6		1	1.31261e-12		1	0.693609
Rxn122	0.14	0.0496	1	0.25498	160.38	1.337	2.1473	0.414	2.562	1.339	3.0407	55.57		0	0.975398		1	2.65453e-05
Rxn123	1.78	0.441	1	0.164453	157.6	1.332	3.0891	0.029	2.561	1.341	6.2897	76.24		0	0.994956		0	0.00607559
Rxn124	5.94	23	1	4.1762e-05	152.82	1.331	2.336	17.881	2.562	1.339	3.0407	36.64		1	0.0219908		1	1.47891e-09
Rxn125	0.0654	0.0159	0	0.872852	0	1.207	1.8376	-5.06	2.574	1.343	6.5203	2.21		1	0.00522248		0	0.351878
Rxn126	57.7	159	1	6.0655e-06	152.82	1.331	2.336	17.881	2.561	1.341	6.2897	36.64		1	1.00302e-10		1	0.00352239
Rxn127	0.0782	0.00832	0	0.9196	0	1.207	1.8376	-5.06	2.576	1.343	6.442	2.21		1	2.97477e-08		1	3.62189e-15
Rxn128	0.017	0.0428	0	0.905418	152.15	1.331	2.1595	18.213	2.633	1.337	5.8366	57.59		0	0.998496		1	5.66843e-07
Rxn129	25000	5970	1	1.23175e-07	152.77	1.333	2.9974	19.157	2.561	1.341	6.2891	78.54		1	0.00513307		1	1.66323e-07
Rxn130	0.048	0.0253	0	0.996124	179.63	1.333	1.7798	-0.759	2.561	1.341	6.2897	55.57		1	2.68703e-13		1	2.66178e-08
Rxn131	2.96	4.19	1	2.65638e-05	152.54	1.333	1.8555	19.609	2.565	1.342	5.4536	2.21		1	1.94459e-13		1	1.87813e-06
Rxn132	0.0021	0.0461	0	0.992262	177.03	1.33	1.7	0.553	2.561	1.341	6.2897	55.57		1	5.10606e-10		0	0.997853
Rxn133	366000	28400	1	4.04363e-09	149.57	1.332	1.9112	19.898	2.561	1.341	6.2891	78.54		0	0.999999		1	1.29074e-05
Rxn134	1	2.8	1	4.74186e-05	152.54	1.333	1.8555	19.609	2.567	1.345	5.5009	2.21		1	0.456208		0	0.988712
Rxn135	0.00143	0.000456	0	0.999205	158.77	1.334	4.849	1.215	2.569	1.342	3.0426	46.3		0	0.999966		0	0.999984
Rxn136	0.00069	0.0011	0	0.999908	179.63	1.333	1.7798	-0.759	2.569	1.344	3.1356	55.57		1	0.00144178		1	0.347073
Rxn137	1.2e-06	1.23e-06	0	1	0	1.207	1.8376	-5.06	2.636	1.336	6.5404	2.21		1	1.715e-13		1	3.01056e-12
Rxn138	0.025	0.064	0	0.735762	152.15	1.331	2.1595	18.213	2.629	1.336	6.2982	57.59		1	3.70238e-09		1	0.576029
Rxn139	19	410	1	2.26223e-06	152.5	1.332	1.814	19.856	2.571	1.346	6.3494	45.02		0	0.818727		0	0.920052
Rxn140	150000	8040	1	1.45884e-08	149.38	1.332	1.8672	20.032	2.559	1.341	6.2889	55.57		0	0.999002		1	0.99791
Rxn141	4.7	1.03	1	0.0654878	152.23	1.332	2.44	19.626	2.607	1.334	2.2556	57.59		0	0.999182		0	0.967714
Rxn142	346	15.8	1	0.00019447	0	1.207	1.8376	-5.06	2.527	1.336	5.0022	2.21		1	0.00079179		1	1.22158e-08
Rxn143	3.4	0.689	1	0.128864	152.23	1.332	2.44	19.626	2.61	1.335	2.2557	57.59		1	2.32085e-07		1	9.79507e-09
Rxn144	163000	18500	1	4.21559e-08	151.97	1.331	2.1026	18.786	2.561	1.341	6.2891	78.54		1	5.95654e-08		1	3.13519e-05
Rxn145	2.3	0.7	1	0.190672	152.23	1.332	2.44	19.626	2.611	1.338	2.0856	57.59		1	9.38501e-05		1	0.000530767
Rxn146	8.5	102	1	6.30865e-06	152.58	1.331	2.7219	17.74	2.563	1.335	3.0408	68.07		1	8.0461e-12		0	0.99194
Rxn147	0.00037	0.0143	0	0.93113	107.96	1.29	3.7767	0	2.561	1.341	6.2897	32.6		1	2.93473e-13		1	0.0329691
Rxn148	0.16	3.39	1	0.00402535	0	1.208	1.7864	0.728	2.577	1.344	8.5872	36.64		1	3.18977e-15		1	0.771654
Rxn149	12.1	0.545	1	0.119304	0	1.207	1.8376	-5.06	2.549	1.334	2.2828	2.21		1	6.17125e-13		1	0.123123
Rxn150	4.44e-05	4.25e-05	0	0.999996	0	1.207	1.8376	-5.06	2.612	1.328	2.2684	2.21		1	9.52329e-17		1	3.35757e-12
Rxn151	22600	46300	1	9.8231e-09	152.5	1.332	1.814	19.856	2.561	1.341	6.2891	78.54		1	2.2371e-15		1	5.88093e-14
Rxn152	2	1.86	1	0.0238688	0	1.207	1.8376	-5.06	2.561	1.341	6.2897	32.6		0	0.972542		1	0.932276
Rxn153	1.4	0.521	1	0.0964511	148.93	1.332	1.8995	22.119	2.633	1.337	5.8366	57.59		1	0.40645		0	0.999283
Rxn154	20	59.5	1	4.8263e-05	152.15	1.331	2.1595	18.213	2.575	1.349	6.3529	45.02		0	0.193387		0	0.0904926
Rxn155	0.56	0.321	1	0.131354	160.18	1.337	3.3713	-0.38	2.561	1.341	6.2897	76.24					1	0.0881845
Rxn156	13000	27900	1	1.46993e-08	152.64	1.333	2.1173	19.628	2.561	1.341	6.2891	78.54
Rxn157	0.000537	0.0691	0	0.999641	176.17	1.326	1.52	-3.517	2.546	1.334	2.0842	42.28
Rxn158	0.0094	0.0141	0	0.996124	179.63	1.333	1.7798	-0.759	2.561	1.341	6.2897	55.57
Rxn159	316	387	1	1.20146e-06	149.1	1.331	1.9896	21.877	2.571	1.346	6.3494	32.6
Rxn160	125	50.1	1	9.72859e-05	0	1.208	1.7864	0.728	2.555	1.339	6.2336	32.6
Rxn161	0.544	0.039	1	0.300069	0	1.207	1.8376	-5.06	2.567	1.342	8.5037	2.21
Rxn162	3.2	2.53	1	0.0105003	160.28	1.337	2.0578	-0.001	2.561	1.341	6.2897	73.81
Rxn163	28	90.4	1	2.18573e-05	152.15	1.331	2.1595	18.213	2.572	1.347	6.351	45.02
Rxn164	0.47	0.713	1	0.0302184	160.38	1.337	2.1473	0.414	2.559	1.341	6.2889	55.57
Rxn165	210	2730	1	1.29638e-07	152.5	1.332	1.814	19.856	2.564	1.343	3.0418	78.54
Rxn166	0.03	0.013	0	0.82218	109.3	1.295	4.1254	0	2.566	1.339	3.0414	68.47
Rxn167	1.2	0.501	1	0.0614823	148.93	1.332	1.8995	22.119	2.632	1.337	6.2992	57.59
Rxn168	25000	28200	1	1.45299e-08	152.65	1.333	2.1364	19.716	2.561	1.341	6.2891	78.54
Rxn169	0.0424	0.0379	0	0.282045	179.63	1.333	1.7798	-0.759	2.508	1.335	3.4643	2.21
Rxn170	5	0.334	1	0.00470233	160.38	1.337	2.1473	0.414	2.551	1.34	6.2355	55.57
Rxn171	32000	37700	1	9.33334e-09	152.55	1.333	1.9069	19.618	2.561	1.341	6.2891	78.54
Rxn172	0.091	1.51	0	0.447461	152.15	1.331	2.1595	18.213	2.624	1.346	7.2554	57.59
Rxn173	5.2	3.07	1	0.00821817	160.38	1.337	2.1473	0.414	2.561	1.341	6.2897	76.24
Rxn174	2.29	4.46	1	0.00328812	109.83	1.298	1.7	0	2.561	1.341	6.2897	50.34
Rxn175	1.76	0.701	1	0.0537584	160.46	1.337	2.9944	0.131	2.561	1.341	6.2897	76.24
Rxn176	0.7	0.569	1	0.0180166	160.38	1.337	2.1473	0.414	2.557	1.339	6.2347	55.57
Rxn177	6.3e-06	0.000291	0	0.999998	176.17	1.326	1.52	-3.517	2.569	1.342	3.0426	42.28
Rxn178	0.00034	0.00736	0	0.9985	177.03	1.33	1.7	0.553	2.56	1.343	3.0394	55.57
Rxn179	0.026	0.0166	0	0.96875	158.77	1.334	4.849	1.215	2.561	1.341	6.2897	46.3
Rxn180	0.081	0.354	0	0.0572187	109.83	1.298	1.7	0	2.569	1.34	3.0419	58.4
Rxn181	0.12	0.156	1	0.336111	159.57	1.335	3.7069	-0.279	2.561	1.341	6.2897	76.24
Rxn182	41	89.5	1	1.38138e-05	152.11	1.332	2.0119	19.852	2.574	1.343	6.5203	32.6
Rxn183	1.9	3.86	1	0.0436104	149.57	1.332	1.9112	19.898	2.624	1.346	7.2554	57.59
Rxn184	3.34	3.35	1	0.000360925	109.83	1.298	1.7	0	2.546	1.334	2.084	58.4
Rxn185	44100	58700	1	9.43913e-10	149.9	1.334	1.9344	20.841	2.56	1.341	6.2889	78.54
Rxn186	0.84	1.13	1	0.0980555	152.15	1.331	2.1595	18.213	2.606	1.334	2.2556	57.59
Rxn187	0.039	0.00436	0	0.758572	109.21	1.295	4.3439	0	2.566	1.34	6.2892	57.59
Rxn188	49	125	1	1.66699e-05	152.15	1.331	2.1595	18.213	2.574	1.343	6.5203	50.34
Rxn189	820	1600	1	3.98159e-07	152.5	1.332	1.814	19.856	2.569	1.342	3.0426	78.54
Rxn190	0.026	0.0307	0	0.992915	179.82	1.334	1.8758	0	2.561	1.341	6.2897	55.57
Rxn191	0.036	0.101	0	0.662884	177.68	1.333	1.7256	0.522	2.547	1.334	2.0841	78.54
Rxn192	0.176	0.709	1	0.0623457	109.83	1.298	1.7	0	2.574	1.343	6.5203	50.34
Rxn193	4400	13900	1	2.8612e-09	152.5	1.332	1.814	19.856	2.552	1.339	4.5408	78.54
Rxn194	0.133	0.0207	1	0.663238	0	1.207	1.8376	-5.06	2.569	1.342	6.5822	2.21
Rxn195	14.9	0.988	1	7.88079e-05	160.28	1.337	2.0578	-0.001	2.508	1.335	3.4643	2.21
Rxn196	4900	46400	1	1.12223e-09	152.5	1.332	1.814	19.856	2.543	1.335	2.0844	78.54
Rxn197	520	183	1	3.43422e-06	149.38	1.332	1.8672	20.032	2.574	1.343	6.5203	32.6
Rxn198	0.00226	0.478	0	0.905215	179.82	1.334	1.8758	0	2.521	1.335	2.0846	2.21
Rxn199	0.07	0.296	0	0.330137	0	1.207	1.8376	-5.06	2.574	1.343	6.5203	32.6
Rxn200	1.32	29.8	1	0.000417159	147.04	1.34	3.2608	-1.596	2.55	1.334	2.0841	74.76
Rxn201	0.293	0.0465	1	0.176405	179.82	1.334	1.8758	0	2.508	1.335	3.4643	2.21
Rxn202	0.25	0.978	1	0.128395	107.88	1.288	2.1497	0	2.561	1.341	6.2897	55.57
Rxn203	0.0047	0.0161	0	0.913294	108	1.289	3.5685	0	2.566	1.339	3.0414	68.47
Rxn204	23	8.91	1	0.0018696	0	1.208	1.7864	0.728	2.567	1.343	6.2901	32.6
Rxn205	740	672	1	6.53986e-07	149.1	1.331	1.9896	21.877	2.567	1.347	5.8394	32.6
Rxn206	0.193	0.359	1	0.164801	152.15	1.331	2.1595	18.213	2.617	1.342	6.5137	57.59
Rxn207	27.1	9.02	1	0.000227539	0	1.207	1.8376	-5.06	2.521	1.335	2.0846	2.21
Rxn208	0.374	0.0323	1	0.47401	0	1.207	1.8376	-5.06	2.566	1.342	6.7288	2.21
Rxn209	9.3	4.77	1	0.000209195	152.52	1.331	5.2234	20.285	2.563	1.335	3.0408	68.07
Rxn210	0.155	0.62	1	0.0490376	160.28	1.337	2.0578	-0.001	2.561	1.341	6.2897	55.57
Rxn211	1.92	0.483	1	0.0180967	159.64	1.332	2.0682	-0.006	2.527	1.336	5.0022	2.21
Rxn212	0.016	0.0793	0	0.865061	177.58	1.329	1.7102	1.121	2.547	1.334	2.0841	78.54
Rxn213	0.0659	0.102	0	0.937382	179.63	1.333	1.7798	-0.759	2.527	1.336	5.0022	2.21
Rxn214	2.3	9.13	1	0.00160338	0	1.208	1.7864	0.728	2.568	1.345	7.1618	32.6
Rxn215	0.0012	0.392	0	0.945993	179.63	1.333	1.7798	-0.759	2.521	1.335	2.0846	2.21
Rxn216	0.217	0.305	1	0.667207	176.82	1.333	1.52	0	2.527	1.336	5.0022	2.21
Rxn217	1.04	1.95	1	0.00072734	109.83	1.298	1.7	0	2.549	1.334	2.0841	58.4
Rxn218	0.011	0.0716	0	0.872	177.58	1.329	1.7117	1.027	2.547	1.334	2.0841	78.54
Rxn219	0.15	0.0775	1	0.229111	160.38	1.337	2.1473	0.414	2.561	1.341	3.0397	55.57
Rxn220	0.0032	0.0019	0	0.999435	179.63	1.333	1.7798	-0.759	2.562	1.339	3.0407	55.57
Rxn221	318000	32800	1	3.17935e-09	149.38	1.332	1.8672	20.032	2.561	1.341	6.2891	78.54
Rxn222	0.000704	0.134	0	0.945993	179.63	1.333	1.7798	-0.759	2.521	1.335	2.0846	2.21
Rxn223	0.00191	0.00145	0	0.993376	0	1.207	1.8376	-5.06	2.581	1.323	2.2158	2.21
Rxn224	11.3	5.72	1	0.00608421	149.57	1.332	1.9112	19.898	2.606	1.334	2.2556	57.59
Rxn225	0.0484	0.0253	0	0.996124	179.63	1.333	1.7798	-0.759	2.561	1.341	6.2897	55.57
Rxn226	2.8	0.183	1	0.375882	109.39	1.293	4.3454	0	2.561	1.341	6.2897	73.81
Rxn227	0.019	0.0746	0	0.372171	109.35	1.296	3.3568	0	2.561	1.341	6.2897	36.64
Rxn228	2670	35	1	1.50601e-05	0	1.208	2.0047	-0.202	2.551	1.34	6.2355	55.57
Rxn229	0.021	0.0411	0	0.854542	152.15	1.331	2.1595	18.213	2.632	1.337	6.2992	57.59
Rxn230	80200	5680	1	7.1814e-08	152.15	1.331	2.1595	18.213	2.561	1.341	6.2891	78.54
Rxn231	10	0.871	1	0.00299434	160.28	1.337	2.0578	-0.001	2.527	1.336	5.0022	2.21
Rxn232	0.000661	0.00036	0	1	0	1.207	1.8376	-5.06	2.675	1.299	6.4259	2.21
Rxn233	12	858	1	1.34365e-06	152.5	1.332	1.814	19.856	2.566	1.349	5.4234	45.02
Rxn234	179000	43100	1	9.9589e-09	152.38	1.332	1.7699	19.617	2.561	1.341	6.2891	78.54
Rxn235	100000	13500	1	4.30153e-08	152.35	1.332	2.5395	19.765	2.561	1.341	6.2891	78.54
Rxn236	3.4	0.759	1	0.104817	152.23	1.332	2.44	19.626	2.609	1.335	2.2558	57.59
Rxn237	0.366	0.0165	1	0.821399	109.35	1.294	4.3443	0	2.566	1.339	3.0414	78.54
Rxn238	0.027	0.485	0	0.274412	107.66	1.287	2.4537	0	2.561	1.341	6.2897	55.57
Rxn239	0.00142	5.51e-05	0	0.999988	0	1.207	1.8376	-5.06	2.612	1.336	5.0133	2.21
Rxn240	6.4	1.2	1	0.0548964	152.23	1.332	2.44	19.626	2.606	1.335	2.2556	57.59
Rxn241	1.3	0.433	1	0.342909	152.23	1.332	2.44	19.626	2.615	1.337	2.2556	57.59
Rxn242	148000	18000	1	3.39308e-08	152.12	1.332	2.1221	18.634	2.561	1.341	6.2891	78.54
Rxn243	80	8.12	1	0.000946491	0	1.208	2.0047	-0.202	2.561	1.341	3.0397	55.57
Rxn244	0.0012	0.0447	0	0.894195	177.05	1.331	1.7025	-0.983	2.547	1.334	2.0841	78.54
Rxn245	0.083	0.345	0	0.0210194	149.57	1.332	1.9112	19.898	2.62	1.339	6.3397	57.59
Rxn246	0.00026	0.0138	0	0.972716	177.03	1.33	1.7	0.553	2.547	1.334	2.0841	55.57
Rxn247	8.48	0.29	1	0.176084	0	1.207	1.8376	-5.06	2.551	1.334	2.3037	2.21
Rxn248	4.6	149	1	3.00066e-06	152.88	1.331	3.0383	20.174	2.563	1.335	3.0408	68.07
Rxn249	0.007	0.0687	0	0.276052	152.15	1.331	2.1595	18.213	2.62	1.339	6.3397	57.59
Rxn250	17.6	0.405	1	0.0823666	0	1.207	1.8376	-5.06	2.547	1.334	2.1813	2.21
Rxn251	31.2	0.458	1	0.0664859	0	1.207	1.8376	-5.06	2.546	1.334	2.177	2.21
Rxn252	261000	2090	1	6.27132e-07	152.19	1.331	3.7649	20.023	2.561	1.341	6.2891	78.54
Rxn253	8340000	67800	1	9.43928e-10	148.93	1.332	1.8995	22.119	2.56	1.341	6.2885	73.95
Rxn254	25	188	1	1.24256e-05	152.15	1.331	2.1595	18.213	2.567	1.349	5.421	45.02
Rxn255	2.72	0.548	1	0.000483415	159.64	1.332	2.0682	-0.006	2.508	1.335	3.4643	2.21
Rxn256	0.02	0.0219	0	0.98957	179.63	1.333	1.7798	-0.759	2.557	1.339	6.2347	55.57
Rxn257	0.51	0.22	1	0.0223059	160.38	1.337	2.1473	0.414	2.551	1.336	3.0392	55.57
Rxn258	38	31.7	1	7.7565e-05	152.15	1.331	2.1595	18.213	2.574	1.343	6.5203	32.6
Rxn259	21000	30400	1	1.26903e-08	152.59	1.333	2.0814	19.719	2.561	1.341	6.2891	78.54
Rxn260	44	112	1	1.65383e-05	152.15	1.331	2.1595	18.213	2.571	1.346	6.3494	45.02
Rxn261	27000	34600	1	1.02915e-08	152.56	1.333	1.9852	19.724	2.561	1.341	6.2891	78.54
Rxn262	1.64	5.38	1	0.00026552	152.54	1.333	1.8555	19.609	2.569	1.344	3.1356	2.21
Rxn263	759	146	1	2.71259e-06	152.15	1.331	2.1595	18.213	2.561	1.341	6.2891	36.64
Rxn264	0.0094	0.023	0	0.977406	176.93	1.328	1.7102	-1.712	2.547	1.334	2.0841	78.54
Rxn265	10	7.63	1	0.00169057	0	1.208	1.7864	0.728	2.57	1.343	7.7476	32.6
Rxn266	0.000392	0.0107	0	0.999921	176.17	1.326	1.52	-3.517	2.561	1.341	6.2897	42.28
Rxn267	0.336	0.279	1	0.278188	107.98	1.289	2.3744	0	2.566	1.339	3.0414	78.54
Rxn268	0.023	0.00824	0	0.951363	0	1.208	2.0047	-0.202	2.597	1.327	2.0851	36.64
Rxn269	0.001	0.00726	0	0.999273	177.63	1.329	1.7177	1.003	2.561	1.341	6.2897	32.6
Rxn270	0.003	0.0043	0	0.999469	179.63	1.333	1.7798	-0.759	2.561	1.341	6.2897	32.6
Rxn271	0.36	0.207	1	0.248569	149.57	1.332	1.9112	19.898	2.632	1.337	6.2992	57.59
Rxn272	0.65	2.43	1	0.00499437	109.83	1.298	1.7	0	2.566	1.339	3.0414	78.54
Rxn273	2300	3340	1	3.48534e-08	152.5	1.332	1.814	19.856	2.562	1.343	4.5796	78.54
Rxn274	14400	14700	1	9.8231e-09	152.5	1.332	1.814	19.856	2.561	1.341	6.2891	78.54
Rxn275	0.189	0.051	1	0.518842	160.46	1.337	2.9944	0.131	2.561	1.341	6.2897	42.28
Rxn276	1250	120	1	9.44101e-06	0	1.208	2.0047	-0.202	2.549	1.34	6.2347	55.57
Rxn277	0.0413	0.0335	0	0.937382	179.63	1.333	1.7798	-0.759	2.527	1.336	5.0022	2.21
Rxn278	0.00204	1.07	0	0.945993	179.63	1.333	1.7798	-0.759	2.521	1.335	2.0846	2.21
Rxn279	0.0042	0.0473	0	0.9911	177.34	1.33	1.7011	0.969	2.561	1.341	6.2897	55.57
Rxn280	0.131	0.115	1	0.979048	179.63	1.333	1.7798	-0.759	2.561	1.341	6.2897	75.24
Rxn281	0.025	0.0288	0	0.677367	160.38	1.337	2.1473	0.414	2.569	1.344	3.1356	55.57
Rxn282	0.078	0.0614	0	0.989578	179.63	1.333	1.7798	-0.759	2.561	1.341	6.2897	67.06
Rxn283	9.4	12.4	1	0.00482204	149.57	1.332	1.9112	19.898	2.605	1.334	2.2557	57.59
Rxn284	3.87	3.81	1	2.17616e-05	152.54	1.333	1.8555	19.609	2.564	1.343	5.4749	2.21
Rxn285	437	74.7	1	9.93178e-05	0	1.208	2.0047	-0.202	2.559	1.341	6.2889	55.57
Rxn286	14	218	1	6.60195e-06	152.5	1.332	1.814	19.856	2.575	1.349	6.3529	45.02
Rxn287	1.27	2.34	1	4.78721e-05	152.54	1.333	1.8555	19.609	2.567	1.345	5.4836	2.21
Rxn288	0.75	10	1	0.000417159	147.04	1.34	3.2608	-1.596	2.55	1.334	2.0841	74.76
Rxn289	1.4	2.48	1	0.00570351	0	1.208	1.7864	0.728	2.577	1.344	8.5872	32.6
Rxn290	2.25	0.118	1	0.0499827	176.82	1.333	1.52	0	2.508	1.335	3.4643	2.21
Rxn291	235	1950	1	1.7941e-07	152.5	1.332	1.814	19.856	2.561	1.341	6.2897	45.02
Rxn292	0.0017	0.0324	0	0.943586	177.34	1.331	1.7	-1.932	2.547	1.334	2.0841	78.54
Rxn293	7.5	1.32	1	0.0525567	152.23	1.332	2.44	19.626	2.606	1.334	2.2556	57.59
Rxn294	184000	6960	1	1.85542e-08	149.57	1.332	1.9112	19.898	2.559	1.341	6.2889	55.57
Rxn295	1.2	0.358	1	0.397307	152.23	1.332	2.44	19.626	2.616	1.337	2.2557	57.59
Rxn296	3300000	68400	1	8.00796e-10	148.93	1.332	1.8995	22.119	2.561	1.341	6.2891	78.54
Rxn297	13.2	2.8	1	0.169476	109.35	1.294	4.3443	0	2.55	1.334	2.0841	74.76
Rxn298	95	26700	1	2.66804e-08	149.57	1.332	1.9112	19.898	2.564	1.328	3.0469	78.54
Rxn299	4360	1080	1	9.12e-08	146.44	1.333	2.3412	25.12	2.574	1.343	6.5203	32.6
Rxn300	11400000	194000	1	9.95224e-11	146.44	1.333	2.3412	25.12	2.56	1.341	6.2885	73.95
Rxn301	250000	3800	1	2.84803e-09	146.44	1.333	2.3412	25.12	2.569	1.338	3.0418	78.54
Rxn302	240	16500	1	1.25083e-09	146.64	1.332	1.7569	25.485	2.561	1.341	6.2897	36.64
Rxn303	0.011	0.0205	0	0.811955	173.98	1.342	1.7752	-0.23	2.562	1.339	3.0407	55.57
Rxn304	0.18	0.0631	1	0.771193	173.98	1.342	1.7752	-0.23	2.568	1.342	6.2903	55.57
Rxn305	0.00029	0.0119	0	0.96362	173.98	1.342	1.7752	-0.23	2.569	1.344	3.1356	55.57
Rxn306	1.4	0.152	1	0.385412	173.98	1.342	1.7752	-0.23	2.561	1.341	6.2897	55.57
Rxn307	0.0017	0.0904	0	0.223505	173.98	1.342	1.7752	-0.23	2.551	1.336	3.0392	55.57
Rxn308	0.0052	0.235	0	0.187965	173.98	1.342	1.7752	-0.23	2.557	1.339	6.2347	55.57
Rxn309	3.2	0.506	1	0.160752	174.24	1.343	1.8858	1.562	2.561	1.341	6.2897	55.57

## Sheet: Remote Diels-Alder
	Parameters extracted from:
	(1) Reid, J. P.; Hu, M.; Ito, S.; Huang, B.; Hong, C. M.; Xiang, H.; Sigman, M. S.; Toste, F. D. Strategies for Remote Enantiocontrol in Chiral Gold( iii ) Complexes Applied to Catalytic Enantioselective γ,δ-Diels–Alder Reactions. Chem. Sci. 2020, 11 (25), 6450–6456. https://doi.org/10.1039/D0SC00497A.
	Success Cutoff: ee = 65%
								MLoR Model Validation			Val BS = 0.1
catalyst	ee	True Class	Probability	E_int	L(2)	B5(2)		TS Class	Predicted Probability		VS Class	Predicted Probability
4g	49	1	0.000474202	-2.72	2.57	1.09		0	0		0	1
4h	45	1	7.99503e-07	-4.83	2.57	1.09		0	0		0	5.57903e-80
4i	28	1	6.11875e-09	-6.44	2.57	1.09		1	1		1	4.31649e-230
4j	52	1	0.000222575	-2.97	2.57	1.09		1	1		1	6.78358e-106
4k	62	1	0.116306	-3.66	4.56	3.13		1	1		1	3.49543e-164
4l	60	1	0.0175274	-4.52	4.7	3.26		1	1		1	1.07013e-174
4m	63	1	0.00149333	-5.41	4.74	3.23		1	1		1	1.81567e-76
4n	59	1	0.000585737	-4.09	3.59	2.11		1	1		1	1.45709e-111
4o	62	1	0.014072	-2.52	3.19	1.47		1	1		1	1.13504e-266
4p	72	0	0.166742	-2.69	3.87	1.75					1	0
4q	56	1	0.387298	-2.71	4.13	1.85
4r	57	1	0.355115	-2.22	3.91	2.72
4s	62	1	0.00120071	-4.38	3.87	1.75
4t	39	1	2.24274e-07	-5.25	2.57	1.09
4u	66	0	0.632264	-4.87	6.69	9.85
4v	59	1	0.319225	-5.28	6.65	9.63
4w	51	1	0.00588755	-6.51	6.52	9.65
4x	72	0	0.9895	-4.91	7.54	9.91
4y	77	0	0.992086	-4.54	7.39	10.07

## Sheet: Amination
	Parameters extracted from:
	(1) Milo, A.; Neel, A. J.; Toste, F. D.; Sigman, M. S. A Data-Intensive Approach to Mechanistic Elucidation Applied to Chiral Anion Catalysis. Science 2015, 347 (6223), 737–743. https://doi.org/10.1126/science.1261043.
	Success Cutoff: ee = 70%
																	MLoR Model Validation			Val BS = 0.13
Rxn	ee	True Class	Probability	vNN	vRingD	L	B1	torsion	iCO	vNH	vNN*vRingD	vNN*vNH	tor*iCO	B1*vBN	B1*(vN-H+iN-H)		TS Class	Predicted Probability		VS Class	Predicted Probability
TS1	77.3983	0	1	1258.88	1286.31	7.28	1.99	104.51	331.36	3523.15	1.61931e+06	4.43522e+06	34630.4	3338.98	7407.2		0	1		0	0.999757
TS2	76.3625	0	1	1261.23	1285.51	10.6	3.31	97.17	331.36	3523.15	1.62132e+06	4.4435e+06	32198.3	5553.78	12320.5		1	5.24099e-158		1	1.55768e-129
TS3	53.0679	1	6.18894e-136	1253.36	1292.28	8.51	1.9	146.84	331.36	3523.15	1.61969e+06	4.41578e+06	48656.9	3187.97	7072.2		1	1.19218e-05		1	5.40852e-179
TS4	28.7231	1	1.28429e-291	1250.35	1292.77	9.28	2.3	149.41	331.36	3523.15	1.61641e+06	4.40517e+06	49508.5	3859.12	8561.08		1	5.49939e-09		1	1.32597e-163
TS5	47.3904	1	3.04572e-286	1246.58	1286.7	8.59	2.03	152.36	331.36	3523.15	1.60397e+06	4.39189e+06	50486	3406.1	7556.09		0	1		1	1
TS6	65.5742	1	3.81823e-07	1261.66	1284.03	8.53	3.31	91.77	327.31	3522.12	1.62001e+06	4.44372e+06	30037.2	5593.27	12281.2		1	4.09372e-05		1	8.12877e-118
TS7	46.0704	1	4.48835e-196	1252.34	1290.8	6.27	1.77	149.77	327.31	3522.12	1.61652e+06	4.41089e+06	49021.2	2990.96	6567.28		1	1.44351e-146		1	7.64957e-166
TS8	57.746	1	1.97005e-20	1239.49	1263.76	6.26	2.01	101.27	327.31	3522.12	1.56642e+06	4.36563e+06	33146.7	3396.52	7457.76		1	2.93334e-126		0	0.999522
TS9	53.6718	1	1.21798e-18	1247.76	1286.34	6.44	1.7	120.76	327.31	3522.12	1.60504e+06	4.39476e+06	39526	2872.68	6307.56		0	0.999523		1	1
TS10	82.001	0	1	1258.88	1286.31	7.28	1.99	104.51	320.57	3525.55	1.61931e+06	4.43824e+06	33502.8	3358.66	7372.19		0	0.999376		0	1
TS11	37.7272	1	5.87138e-05	1261.23	1285.51	10.6	3.31	97.17	320.57	3525.55	1.62132e+06	4.44653e+06	31149.8	5586.52	12262.3		1	2.5071e-221		1	7.95955e-254
TS12	59.4098	1	3.90924e-149	1253.36	1292.28	8.51	1.9	146.84	320.57	3525.55	1.61969e+06	4.41878e+06	47072.5	3206.76	7038.78		1	1.07843e-280		0	1
TS13	37.0007	1	7.26217e-308	1250.35	1292.77	9.28	2.3	149.41	320.57	3525.55	1.61641e+06	4.40817e+06	47896.4	3881.87	8520.63		1	0.000429554		1	1.15486e-182
TS14	51.2237	1	8.73319e-301	1246.58	1286.7	8.59	2.03	152.36	320.57	3525.55	1.60397e+06	4.39488e+06	48842	3426.17	7520.38		0	1		1	1
TS15	75.6493	0	1	1261.66	1284.03	8.53	3.31	91.77	309.35	3511.74	1.62001e+06	4.43062e+06	28389	5541.4	12194.5		1	4.74799e-153		0	1
TS16	38.4491	1	2.33724e-181	1252.34	1290.8	6.27	1.77	149.77	309.35	3511.74	1.61652e+06	4.39789e+06	46331.3	2963.23	6520.95		1	1.80712e-205		1	2.59264e-182
TS17	77.3983	0	0.97717	1239.49	1263.76	6.26	2.01	101.27	309.35	3511.74	1.56642e+06	4.35277e+06	31327.9	3365.02	7405.14		0	1		1	1.48197e-205
TS18	63.606	1	0.11047	1247.76	1286.34	6.44	1.7	120.76	309.35	3511.74	1.60504e+06	4.38181e+06	37357.1	2846.04	6263.05		0	0.99999		0	0.00596002
TS19	70.1246	0	1	1258.88	1286.31	7.28	1.99	104.51	392.1	3508.11	1.61931e+06	4.41629e+06	40978.4	3335.52	7449.92		0	1		0	1
TS20	82.5466	0	1	1261.23	1285.51	10.6	3.31	97.17	392.1	3508.11	1.62132e+06	4.42453e+06	38100.4	5548.02	12391.6		1	1.06404e-192		1	1.8053e-224
TS21	20.8023	1	3.37315e-132	1253.36	1292.28	8.51	1.9	146.84	392.1	3508.11	1.61969e+06	4.39692e+06	57576	3184.67	7112.99		1	1.7892e-250		0	1
TS22	0	1	1.3353e-285	1250.35	1292.77	9.28	2.3	149.41	392.1	3508.11	1.61641e+06	4.38637e+06	58583.7	3855.12	8610.46		1	1.35789e-11		1	1.31295e-289
TS23	10.0984	1	1.06489e-279	1246.58	1286.7	8.59	2.03	152.36	392.1	3508.11	1.60397e+06	4.37314e+06	59740.4	3402.56	7599.67		0	1		1	2.22427e-34
TS24	88.5725	0	1	1261.66	1284.03	8.53	3.31	91.77	343.62	3515.73	1.62001e+06	4.43566e+06	31534	5544.61	12355.7		1	2.44016e-185		0	1
TS25	0	1	1.31777e-177	1252.34	1290.8	6.27	1.77	149.77	343.62	3515.73	1.61652e+06	4.40289e+06	51464	2964.94	6607.13		1	1.60601e-242		1	3.02497e-217
TS26	67.457	1	0.0309817	1239.49	1263.76	6.26	2.01	101.27	343.62	3515.73	1.56642e+06	4.35771e+06	34798.4	3366.97	7503.01		1	7.82652e-305		1	3.00206e-22
TS27	44.7297	1	0.0102962	1247.76	1286.34	6.44	1.7	120.76	343.62	3515.73	1.60504e+06	4.38679e+06	41495.6	2847.69	6345.83		1	4.55371e-60		1	1.38547e-44
TS28	70.5512	0	1	1258.88	1286.31	7.28	1.99	104.51	349.88	3513.4	1.61931e+06	4.42295e+06	36566	3333.25	7444.67		0	0.999644		1	2.58035e-166
TS29	88.5725	0	1	1261.23	1285.51	10.6	3.31	97.17	349.88	3513.4	1.62132e+06	4.43121e+06	33997.8	5544.25	12382.8		1	3.10984e-05		1	1
TS30	15.9076	1	3.89074e-129	1253.36	1292.28	8.51	1.9	146.84	349.88	3513.4	1.61969e+06	4.40356e+06	51376.4	3182.5	7107.98		1	7.63183e-05		0	1
TS31	12.5989	1	5.25618e-283	1250.35	1292.77	9.28	2.3	149.41	349.88	3513.4	1.61641e+06	4.39298e+06	52275.6	3852.5	8604.39		1	8.58865e-157		1	1.59357e-127
TS32	28.7231	1	6.02252e-278	1246.58	1286.7	8.59	2.03	152.36	349.88	3513.4	1.60397e+06	4.37973e+06	53307.7	3400.25	7594.31		1	5.39979e-07		1	1.06091e-176
TS33	91.0149	0	1	1261.66	1284.03	8.53	3.31	91.77	360.72	3501.63	1.62001e+06	4.41787e+06	33103.3	5541.6	12381.8		1	3.52824e-08		1	2.66834e-153
TS34	25.5949	1	1.2711e-173	1252.34	1290.8	6.27	1.77	149.77	360.72	3501.63	1.61652e+06	4.38523e+06	54025	2963.33	6621.06		0	1		1	1
TS35	80.5692	0	0.865112	1239.49	1263.76	6.26	2.01	101.27	360.72	3501.63	1.56642e+06	4.34024e+06	36530.1	3365.14	7518.83		1	1.36381e-91		0	1
TS36	73.006	0	0.679716	1247.76	1286.34	6.44	1.7	120.76	360.72	3501.63	1.60504e+06	4.36919e+06	43560.5	2846.14	6359.21		1	6.08421e-138		1	2.88551e-119
TS37	88.5725	0	1	1258.88	1286.31	7.28	1.99	104.51	379.96	3488.15	1.61931e+06	4.39116e+06	39709.6	3339.12	7456.85		0	1		1	1.33269e-263
TS38	92.9548	0	1	1261.23	1285.51	10.6	3.31	97.17	379.96	3488.15	1.62132e+06	4.39936e+06	36920.7	5554.01	12403.1		1	4.45927e-16		1	5.98232e-27
TS39	61.5515	1	1.44776e-128	1253.36	1292.28	8.51	1.9	146.84	379.96	3488.15	1.61969e+06	4.37191e+06	55793.3	3188.11	7119.6		0	1		0	1
TS40	23.2127	1	7.9274e-282	1250.35	1292.77	9.28	2.3	149.41	379.96	3488.15	1.61641e+06	4.36141e+06	56769.8	3859.28	8618.47		1	1.17496e-144		1	1.18467e-173
TS41	31.7911	1	3.39235e-275	1246.58	1286.7	8.59	2.03	152.36	379.96	3488.15	1.60397e+06	4.34826e+06	57890.7	3406.24	7606.73		1	4.32117e-196		0	1
TS42	91.9765	0	1	1261.66	1284.03	8.53	3.31	91.77	414.34	3475.87	1.62001e+06	4.38537e+06	38024	5519.52	12306.4		1	0.000394011		1	1.12285e-191
TS43	51.2237	1	7.70758e-169	1252.34	1290.8	6.27	1.77	149.77	414.34	3475.87	1.61652e+06	4.35297e+06	62055.7	2951.53	6580.79		0	1		1	1
TS44	66.9942	1	0.00389145	1239.49	1263.76	6.26	2.01	101.27	414.34	3475.87	1.56642e+06	4.30831e+06	41960.2	3351.74	7473.1		1	5.98483e-166		0	1
TS45	53.6718	1	0.143778	1247.76	1286.34	6.44	1.7	120.76	414.34	3475.87	1.60504e+06	4.33705e+06	50035.7	2834.8	6320.53		1	2.48852e-220		1	4.38979e-196
TS46	82.5466	0	1	1258.88	1286.31	7.28	1.99	104.51	374.97	3484.99	1.61931e+06	4.38718e+06	39188.1	3338.3	7418.44		0	1		1	5.62819e-234
TS47	85.9638	0	1	1261.23	1285.51	10.6	3.31	97.17	374.97	3484.99	1.62132e+06	4.39537e+06	36435.8	5552.66	12339.2		1	0.000182113		1	6.45101e-08
TS48	48.0425	1	1.96363e-130	1253.36	1292.28	8.51	1.9	146.84	374.97	3484.99	1.61969e+06	4.36795e+06	55060.6	3187.33	7082.93		0	1		0	1
TS49	16.7296	1	2.84002e-284	1250.35	1292.77	9.28	2.3	149.41	374.97	3484.99	1.61641e+06	4.35746e+06	56024.3	3858.34	8574.08		1	2.27278e-245		1	6.16528e-280
TS50	31.7911	1	3.48427e-277	1246.58	1286.7	8.59	2.03	152.36	374.97	3484.99	1.60397e+06	4.34432e+06	57130.4	3405.41	7567.56		1	0		0	1
TS51	57.1804	1	5.47793e-15	1261.66	1284.03	8.53	3.31	91.77	400.62	3553.05	1.62001e+06	4.48274e+06	36764.9	5539.52	12165.3		1	0.000484974		1	4.89758e-226
TS52	53.0679	1	5.85709e-197	1252.34	1290.8	6.27	1.77	149.77	400.62	3553.05	1.61652e+06	4.44963e+06	60000.9	2962.22	6505.3		0	1		1	0.000347873
TS53	54.8633	1	2.83397e-39	1239.49	1263.76	6.26	2.01	101.27	400.62	3553.05	1.56642e+06	4.40397e+06	40570.8	3363.88	7387.37		1	4.87527e-33		1	1.73516e-262
TS54	39.1663	1	1.22214e-30	1247.76	1286.34	6.44	1.7	120.76	400.62	3553.05	1.60504e+06	4.43335e+06	48378.9	2845.07	6248.03		1	6.50413e-297		1	0
TS55	79.3515	0	1	1261.66	1284.03	8.53	3.31	91.77	331.36	3523.15	1.62001e+06	4.44502e+06	30408.9	5553.78	12320.5
TS56	48.6894	1	8.35283e-183	1252.34	1290.8	6.27	1.77	149.77	331.36	3523.15	1.61652e+06	4.41218e+06	49627.8	2969.85	6588.31
TS57	63.1006	1	2.75293e-06	1239.49	1263.76	6.26	2.01	101.27	331.36	3523.15	1.56642e+06	4.36691e+06	33556.8	3372.54	7481.64
TS58	58.3061	1	1.77487e-06	1247.76	1286.34	6.44	1.7	120.76	331.36	3523.15	1.60504e+06	4.39605e+06	40015	2852.4	6327.76
TS59	79.9686	0	1	1258.88	1286.31	7.28	1.99	104.51	327.31	3522.12	1.61931e+06	4.43393e+06	34207.2	3362.72	7383.56
TS60	48.6894	1	1.32337e-08	1261.23	1285.51	10.6	3.31	97.17	327.31	3522.12	1.62132e+06	4.4422e+06	31804.7	5593.27	12281.2
TS61	51.8439	1	3.58229e-150	1253.36	1292.28	8.51	1.9	146.84	327.31	3522.12	1.61969e+06	4.41448e+06	48062.2	3210.64	7049.63
TS62	21.6087	1	0	1250.35	1292.77	9.28	2.3	149.41	327.31	3522.12	1.61641e+06	4.40388e+06	48903.4	3886.56	8533.76
TS63	45.4026	1	1.59279e-301	1246.58	1286.7	8.59	2.03	152.36	327.31	3522.12	1.60397e+06	4.3906e+06	49869	3430.31	7531.97
TS64	63.606	1	0.00252427	1261.66	1284.03	8.53	3.31	91.77	320.57	3525.55	1.62001e+06	4.44805e+06	29418.7	5586.52	12262.3
TS65	48.6894	1	3.08412e-195	1252.34	1290.8	6.27	1.77	149.77	320.57	3525.55	1.61652e+06	4.41519e+06	48011.8	2987.35	6557.18
TS66	67.457	1	2.06264e-18	1239.49	1263.76	6.26	2.01	101.27	320.57	3525.55	1.56642e+06	4.36988e+06	32464.1	3392.42	7446.29
TS67	66.9942	1	3.942e-17	1247.76	1286.34	6.44	1.7	120.76	320.57	3525.55	1.60504e+06	4.39904e+06	38712	2869.21	6297.85
TS68	84.0948	0	1	1258.88	1286.31	7.28	1.99	104.51	309.35	3511.74	1.61931e+06	4.42086e+06	32330.2	3331.54	7331.46
TS69	77.3983	0	1	1261.23	1285.51	10.6	3.31	97.17	309.35	3511.74	1.62132e+06	4.42911e+06	30059.5	5541.4	12194.5
TS70	48.0425	1	1.72883e-134	1253.36	1292.28	8.51	1.9	146.84	309.35	3511.74	1.61969e+06	4.40147e+06	45425	3180.87	6999.88
TS71	24.01	1	1.19981e-290	1250.35	1292.77	9.28	2.3	149.41	309.35	3511.74	1.61641e+06	4.3909e+06	46220	3850.52	8473.54
TS72	37.7272	1	8.61362e-285	1246.58	1286.7	8.59	2.03	152.36	309.35	3511.74	1.60397e+06	4.37766e+06	47132.6	3398.5	7478.82
TS73	83.0773	0	1	1261.66	1284.03	8.53	3.31	91.77	392.1	3508.11	1.62001e+06	4.42604e+06	35983	5548.02	12391.6
TS74	6.74506	1	1.60448e-178	1252.34	1290.8	6.27	1.77	149.77	392.1	3508.11	1.61652e+06	4.39335e+06	58724.8	2966.77	6626.31
TS75	49.331	1	1.67258e-12	1239.49	1263.76	6.26	2.01	101.27	392.1	3508.11	1.56642e+06	4.34827e+06	39708	3369.04	7524.8
TS76	23.2127	1	1.5594e-09	1247.76	1286.34	6.44	1.7	120.76	392.1	3508.11	1.60504e+06	4.37728e+06	47350	2849.44	6364.26
TS77	70.5512	0	1	1258.88	1286.31	7.28	1.99	104.51	343.62	3515.73	1.61931e+06	4.42588e+06	35911.7	3333.47	7428.35
TS78	85.5165	0	1	1261.23	1285.51	10.6	3.31	97.17	343.62	3515.73	1.62132e+06	4.43414e+06	33389.6	5544.61	12355.7
TS79	5.90403	1	1.22588e-130	1253.36	1292.28	8.51	1.9	146.84	343.62	3515.73	1.61969e+06	4.40648e+06	50457.2	3182.71	7092.4
TS80	6.74506	1	5.75503e-285	1250.35	1292.77	9.28	2.3	149.41	343.62	3515.73	1.61641e+06	4.39589e+06	51340.3	3852.75	8585.53
TS81	31.03	1	7.48246e-280	1246.58	1286.7	8.59	2.03	152.36	343.62	3515.73	1.60397e+06	4.38264e+06	52353.9	3400.47	7577.67
TS82	86.3982	0	1	1261.66	1284.03	8.53	3.31	91.77	349.88	3513.4	1.62001e+06	4.43272e+06	32108.5	5544.25	12382.8
TS83	10.9335	1	4.16371e-176	1252.34	1290.8	6.27	1.77	149.77	349.88	3513.4	1.61652e+06	4.39997e+06	52401.5	2964.75	6621.64
TS84	64.6008	1	0.120484	1239.49	1263.76	6.26	2.01	101.27	349.88	3513.4	1.56642e+06	4.35482e+06	35432.3	3366.75	7519.49
TS85	31.7911	1	0.054196	1247.76	1286.34	6.44	1.7	120.76	349.88	3513.4	1.60504e+06	4.38388e+06	42251.5	2847.5	6359.77
TS86	82.5466	0	1	1258.88	1286.31	7.28	1.99	104.51	360.72	3501.63	1.61931e+06	4.40813e+06	37698.8	3331.66	7444.01
TS87	89.449	0	1	1261.23	1285.51	10.6	3.31	97.17	360.72	3501.63	1.62132e+06	4.41636e+06	35051.2	5541.6	12381.8
TS88	34.0497	1	7.54241e-127	1253.36	1292.28	8.51	1.9	146.84	360.72	3501.63	1.61969e+06	4.3888e+06	52968.1	3180.98	7107.35
TS89	24.01	1	4.24262e-280	1250.35	1292.77	9.28	2.3	149.41	360.72	3501.63	1.61641e+06	4.37826e+06	53895.2	3850.66	8603.63
TS90	46.733	1	1.33955e-274	1246.58	1286.7	8.59	2.03	152.36	360.72	3501.63	1.60397e+06	4.36506e+06	54959.3	3398.63	7593.64
TS91	93.5067	0	1	1261.66	1284.03	8.53	3.31	91.77	379.96	3488.15	1.62001e+06	4.40086e+06	34868.9	5554.01	12403.1
TS92	57.1804	1	9.14133e-175	1252.34	1290.8	6.27	1.77	149.77	379.96	3488.15	1.61652e+06	4.36835e+06	56906.6	2969.97	6632.47
TS93	63.1006	1	0.000618603	1239.49	1263.76	6.26	2.01	101.27	379.96	3488.15	1.56642e+06	4.32353e+06	38478.5	3372.68	7531.79
TS94	54.2703	1	0.00250906	1247.76	1286.34	6.44	1.7	120.76	379.96	3488.15	1.60504e+06	4.35237e+06	45884	2852.51	6370.17
TS95	83.5932	0	1	1258.88	1286.31	7.28	1.99	104.51	414.34	3475.87	1.61931e+06	4.3757e+06	43302.7	3318.38	7398.74
TS96	91.0149	0	1	1261.23	1285.51	10.6	3.31	97.17	414.34	3475.87	1.62132e+06	4.38387e+06	40261.4	5519.52	12306.4
TS97	56.0328	1	8.71838e-123	1253.36	1292.28	8.51	1.9	146.84	414.34	3475.87	1.61969e+06	4.35652e+06	60841.7	3168.31	7064.12
TS98	23.2127	1	4.87377e-274	1250.35	1292.77	9.28	2.3	149.41	414.34	3475.87	1.61641e+06	4.34605e+06	61906.5	3835.32	8551.31
TS99	32.5482	1	2.16567e-267	1246.58	1286.7	8.59	2.03	152.36	414.34	3475.87	1.60397e+06	4.33295e+06	63128.8	3385.09	7547.46
TS100	85.9638	0	1	1261.66	1284.03	8.53	3.31	91.77	374.97	3484.99	1.62001e+06	4.39687e+06	34411	5552.66	12339.2
TS101	33.301	1	1.80732e-176	1252.34	1290.8	6.27	1.77	149.77	374.97	3484.99	1.61652e+06	4.36439e+06	56159.3	2969.25	6598.31
TS102	60.4916	1	0.000146785	1239.49	1263.76	6.26	2.01	101.27	374.97	3484.99	1.56642e+06	4.31961e+06	37973.2	3371.86	7493
TS103	58.8607	1	0.000377008	1247.76	1286.34	6.44	1.7	120.76	374.97	3484.99	1.60504e+06	4.34843e+06	45281.4	2851.82	6337.36
TS104	70.1246	0	1	1258.88	1286.31	7.28	1.99	104.51	400.62	3553.05	1.61931e+06	4.47286e+06	41868.8	3330.4	7313.87
TS105	61.0243	1	7.97204e-15	1261.23	1285.51	10.6	3.31	97.17	400.62	3553.05	1.62132e+06	4.48121e+06	38928.2	5539.52	12165.3
TS106	27.9464	1	6.0994e-151	1253.36	1292.28	8.51	1.9	146.84	400.62	3553.05	1.61969e+06	4.45325e+06	58827	3179.78	6983.09
TS107	24.01	1	2.05569e-307	1250.35	1292.77	9.28	2.3	149.41	400.62	3553.05	1.61641e+06	4.44256e+06	59856.6	3849.21	8453.21
TS108	28.7231	1	1.09915e-301	1246.58	1286.7	8.59	2.03	152.36	400.62	3553.05	1.60397e+06	4.42916e+06	61038.5	3397.35	7460.88
Designed Catalyst Rxn 1	74.1674	0	7.74713e-74	1240.47	1271.68	6.98	1.77	121.21	331.36	3523.15	1.57748e+06	4.37036e+06	40164.1	2969.85	6588.31
Designed Catalyst Rxn 2	66.9942	1	1.7511e-86	1240.47	1271.68	6.98	1.77	121.21	327.31	3522.12	1.57748e+06	4.36908e+06	39673.2	2990.96	6567.28
Designed Catalyst Rxn 3	63.1006	1	3.56033e-85	1240.47	1271.68	6.98	1.77	121.21	320.57	3525.55	1.57748e+06	4.37334e+06	38856.3	2987.35	6557.18
Designed Catalyst Rxn 4	59.9535	1	1.50295e-75	1240.47	1271.68	6.98	1.77	121.21	392.1	3508.11	1.57748e+06	4.35171e+06	47526.4	2966.77	6626.31
Designed Catalyst Rxn 5	54.2703	1	2.29275e-69	1240.47	1271.68	6.98	1.77	121.21	343.62	3515.73	1.57748e+06	4.36116e+06	41650.2	2964.94	6607.13
Designed Catalyst Rxn 6	59.9535	1	5.13592e-100	1240.47	1271.68	6.98	1.77	121.21	400.62	3553.05	1.57748e+06	4.40745e+06	48559.2	2962.22	6505.3
Designed Catalyst Rxn 7	85.0561	0	1	1258.07	1279.69	7.98	2.91	89.83	331.36	3523.15	1.60994e+06	4.43237e+06	29766.1	4882.63	10831.6
Designed Catalyst Rxn 8	74.9177	0	1	1258.07	1279.69	7.98	2.91	89.83	327.31	3522.12	1.60994e+06	4.43107e+06	29402.3	4917.35	10797.1
Designed Catalyst Rxn 9	78.0666	0	1	1258.07	1279.69	7.98	2.91	89.83	309.35	3511.74	1.60994e+06	4.41801e+06	27788.9	4871.75	10720.9
Designed Catalyst Rxn 10	88.0142	0	1	1258.07	1279.69	7.98	2.91	89.83	392.1	3508.11	1.60994e+06	4.41345e+06	35222.3	4877.57	10894.1
Designed Catalyst Rxn 11	92.9548	0	1	1258.07	1279.69	7.98	2.91	89.83	349.88	3513.4	1.60994e+06	4.4201e+06	31429.7	4874.25	10886.4
Designed Catalyst Rxn 12	90.5699	0	1	1258.07	1279.69	7.98	2.91	89.83	360.72	3501.63	1.60994e+06	4.4053e+06	32403.5	4871.92	10885.5
Designed Catalyst Rxn 13	91.4398	0	1	1258.07	1279.69	7.98	2.91	89.83	343.62	3515.73	1.60994e+06	4.42303e+06	30867.4	4874.57	10862.6
Designed Catalyst Rxn 14	94.4879	0	1	1258.07	1279.69	7.98	2.91	89.83	379.96	3488.15	1.60994e+06	4.38834e+06	34131.8	4882.83	10904.2
Designed Catalyst Rxn 15	92.9548	0	1	1258.07	1279.69	7.98	2.91	89.83	414.34	3475.87	1.60994e+06	4.37289e+06	37220.2	4852.51	10819.3
Designed Catalyst Rxn 16	92.9548	0	1	1258.07	1279.69	7.98	2.91	89.83	374.97	3484.99	1.60994e+06	4.38436e+06	33683.6	4881.64	10848.1
Designed Catalyst Rxn 17	76.0082	0	1	1256.37	1290.25	6.26	1.95	68.19	331.36	3523.15	1.62103e+06	4.42638e+06	22595.4	3271.87	7258.31
Designed Catalyst Rxn 18	78.0666	0	1	1256.37	1290.25	6.26	1.95	68.19	327.31	3522.12	1.62103e+06	4.42509e+06	22319.3	3295.13	7235.14
Designed Catalyst Rxn 19	78.0666	0	1	1256.37	1290.25	6.26	1.95	68.19	320.57	3525.55	1.62103e+06	4.4294e+06	21859.7	3291.15	7224.01
Designed Catalyst Rxn 20	87.0266	0	1	1256.37	1290.25	6.26	1.95	68.19	309.35	3511.74	1.62103e+06	4.41204e+06	21094.6	3264.57	7184.09

## Sheet: Nucleophilicity
	Parameters extracted from:
	(1) Orlandi, M.; Escudero-Casao, M.; Licini, G. Nucleophilicity Prediction via Multivariate Linear Regression Analysis. J. Org. Chem. 2021, 86 (4), 3555–3564. https://doi.org/10.1021/acs.joc.0c02952.
	Success Cutoff: N = 17
														MLoR Model Validation			Val BS = 0.08
Nucleophile	N	True Class	Probability	E_PA	S_Nu	S_Int	S_H	epsilon	q	eHOMO	%VH	B1		TS Class	Predicted Probability		VS Class	Predicted Probability
Nu1	-4.36	1	5.90942e-07	-191.12	-6.7	-55.29	-122.52	8.93	0	-0.29582	29.4	2.11		1	1.11559e-06		1	3.73825e-07
Nu2	-3.57	1	1.28296e-06	-197.86	-7.09	-53.69	-122.52	8.93	0	-0.289	33.9	2.11		1	9.47772e-06		1	5.45259e-06
Nu3	-1.18	1	7.73592e-06	-203.07	-6.97	-52.93	-122.52	8.93	0	-0.27769	29.5	2.11		1	0.00515532		1	4.96414e-05
Nu4	0.13	1	1.00702e-05	-208.04	-7.33	-51.45	-122.52	8.93	0	-0.2747	33.7	2.11		1	0.00641889		1	0.00186669
Nu5	2.48	1	5.26311e-05	-215.64	-7.51	-49.96	-122.52	8.93	0	-0.26395	32.1	2.09		1	0.000702918		1	0.000628779
Nu6	6.91	1	0.00817011	-224.16	-11.07	-61.26	-134.02	37.5	0	-0.25196	33.8	2.15		1	0.00172213		1	0.000289972
Nu7	6.08	1	0.00320374	-219.4	-11.76	-63.89	-134.02	37.5	0	-0.26294	33.8	2.15		1	0.00184494		1	0.00368811
Nu8	7.26	1	0.0112053	-227.46	-11.71	-59.84	-134.02	37.5	0	-0.24805	33.9	2.21		1	0.000350098		1	0.000614626
Nu9	4.38	1	0.0012892	-212.3	-11.84	-66.49	-134.02	37.5	0	-0.26879	30.4	2.06		1	0.00288288		1	0.0010029
Nu10	6.08	1	0.00136551	-212.58	-11.37	-65.97	-134.02	37.5	0	-0.26815	30.4	2.05		1	0.00177251		1	0.0019055
Nu11	2.83	1	0.000728948	-204.61	-13.85	-73.63	-134.02	37.5	0	-0.28165	30.3	2.05		1	0.0211063		1	0.00584757
Nu12	6	1	0.00310466	-218.89	-10.81	-61.97	-134.02	37.5	0	-0.25574	30.3	2.05		1	0.00971246		1	0.000620502
Nu13	7.22	1	0.00845577	-224.77	-13.73	-61.35	-134.02	37.5	0	-0.23704	30.4	2.05		1	2.0535e-05		1	3.28369e-05
Nu14	6.44	1	0.00400704	-218.8	-13.07	-64.8	-134.02	37.5	0	-0.25385	30.4	2.05		1	0.000193024		1	0.000175292
Nu15	6.22	1	0.000887216	-220.33	-11.42	-57.32	-122.52	8.93	0	-0.25202	30.4	2.05		1	0.000144417		1	0.00279738
Nu16	3.97	1	0.000851793	-210.8	-13.73	-68.53	-134.02	37.5	0	-0.27116	30.4	2.06		1	5.2145e-06		1	0.00276772
Nu17	5.75	1	0.00128348	-223.15	-10.66	-56.05	-122.52	8.93	0	-0.25273	30.4	2.05		1	2.43731e-05		1	3.58891e-06
Nu18	6.54	1	0.0033013	-229.31	-11.16	-54.74	-122.52	8.93	0	-0.24743	33.9	2.15		1	0.032769		1	0.000701096
Nu19	5.41	1	0.00343739	-219.43	-11.36	-60.93	-134.02	37.5	0	-0.24391	32.2	2.05		1	0.000414651		1	0.00203479
Nu20	4.63	1	0.00295849	-211.74	-8.03	-64.67	-134.02	37.5	0	-0.26631	27.6	2.01		0	0.926141		1	0.0388581
Nu21	8.01	1	0.00792769	-220.11	-8.42	-60.2	-134.02	37.5	0	-0.24497	31.4	2.01		1	0.685755		1	0.35883
Nu22	10.67	1	0.0238582	-227.93	-8.08	-59.16	-134.02	37.5	0	-0.25008	31.1	2.02		1	0.917997		0	0.805146
Nu23	5.85	1	0.000539566	-217.71	-7.78	-57.03	-122.52	8.93	0	-0.2689	31.9	2.01		1	0.789797		1	0.0224203
Nu24	8.69	1	0.01168	-225.9	-8.08	-57.08	-134.02	37.5	0	-0.24181	31.6	2.01		0	0.999422		1	0.0118799
Nu25	1.33	1	3.30785e-05	-198.01	-4.15	-59.55	-122.52	8.93	0	-0.28763	26.8	1.93		0	0.997464		0	0.999326
Nu26	2.16	1	2.08999e-05	-209.63	-4.98	-50.61	-122.52	8.93	0	-0.27967	26.9	1.98		0	0.995801		0	0.994445
Nu27	3.61	1	0.000166189	-208.79	-4.99	-56.51	-122.52	8.93	0	-0.27393	26.8	1.92		0	0.992576		0	0.996741
Nu28	2.9	1	0.00120252	-215.26	-9.52	-55.03	-134.02	37.5	0	-0.27123	36.9	3.29		0	0.983814		0	0.998395
Nu29	6.38	1	0.0159351	-229.52	-15.26	-58.26	-134.02	37.5	0	-0.25263	42.6	3.26		0	0.999665		0	0.996044
Nu30	1.84	1	0.00199197	-209.94	-22.62	-75.41	-134.02	37.5	0	-0.28001	42.6	3.33		1	0.113715		0	0.980088
Nu31	7.22	1	0.00209058	-229.88	-5.2	-48.59	-122.52	8.93	0	-0.2575	27.6	1.98		1	0.0742882		1	0.88405
Nu32	-1.01	1	5.59829e-06	-197.6	-5.02	-56.57	-122.52	8.93	0	-0.29499	29.2	2.03		1	0.05383		1	0.842504
Nu33	-0.8	1	3.68514e-06	-206.95	-5.78	-49.67	-122.52	8.93	0	-0.28867	29.1	2.02		0	0.837094		0	0.424268
Nu34	1.35	1	2.52653e-05	-206.13	-5.77	-54.59	-122.52	8.93	0	-0.28212	29.2	2.02		0	0.998946		1	0.681638
Nu35	3.06	1	0.000723146	-215.51	-5.4	-56.77	-134.02	37.5	0	-0.2685	31.3	2.01		1	1.17204e-06		0	0.760835
Nu36	11.63	1	0.0366343	-231.81	-8.36	-57.63	-134.02	37.5	0	-0.24553	31.2	2.03		1	3.80166e-06		1	1.25878e-06
Nu37	6.66	1	0.0021407	-227.94	-9.96	-53.02	-122.52	8.93	0	-0.24455	31.7	2.03		1	1.34836e-05		1	9.15036e-07
Nu38	3.87	1	0.000795397	-211.55	-10.91	-65.29	-134.02	37.5	0	-0.27341	30.1	2.06		1	7.04328e-06		1	4.12413e-06
Nu39	18.29	0	0.921006	-341.06	-50.8	-8.12	-134.71	46.7	1	-0.07092	35.4	2.19		1	2.2685e-06		1	1.61896e-05
Nu40	12.05	1	0.0732024	-341.06	-56.85	-4.93	-135.03	80.1	1	-0.07092	35.4	2.19		1	0.000121286		1	1.07198e-06
Nu41	15.59	1	0.712701	-330.68	-52.49	-16.77	-134.71	46.7	1	-0.1037	33	2.15		1	1.86985e-05		1	1.2421e-05
Nu42	14.24	1	0.356058	-323.61	-49.93	-15.99	-134.71	46.7	1	-0.11597	32.9	2.15		1	1.02413e-05		1	1.91627e-05
Nu43	17.46	0	0.7824	-333.83	-49.93	-12.97	-134.71	46.7	1	-0.10135	33.5	2.16		1	0.000101389		1	8.51955e-06
Nu44	16.27	1	0.907143	-341.77	-52.94	-12.07	-134.71	46.7	1	-0.0835	36.6	2.14		1	1.6763e-05		1	1.65433e-06
Nu45	11.77	1	0.0447083	-341.77	-60.21	-9.15	-135.03	80.1	1	-0.0835	36.6	2.14		1	1.22349e-05		1	0.000109862
Nu46	13.91	1	0.785723	-336.89	-52.63	-13.58	-134.71	46.7	1	-0.09578	33.4	2.09		1	0.000118049		1	4.86447e-06
Nu47	12.06	1	0.0246512	-336.89	-58.99	-10.76	-135.03	80.1	1	-0.09578	33.4	2.09		1	2.84142e-05		1	4.936e-05
Nu48	27.54	0	0.999387	-357.6	-51.46	-8.88	-134.71	46.7	1	-0.051	35.9	2.35		1	3.20041e-05		1	2.98944e-06
Nu49	27.62	0	0.998917	-351.28	-47.79	-9.87	-134.71	46.7	1	-0.06271	35.8	2.24		1	7.18156e-06		1	1.9379e-05
Nu50	23.64	0	0.995444	-341.77	-45.42	-11.41	-134.71	46.7	1	-0.07799	35.8	2.24		1	2.20342e-05		1	5.25573e-05
Nu51	20	0	0.988796	-337.78	-43.71	-10.93	-134.71	46.7	1	-0.0873	35.8	2.24		1	3.66422e-05		1	0.000100987
Nu52	23.27	0	0.994484	-348.48	-49.91	-10.04	-134.71	46.7	1	-0.06836	35.8	2.23		1	1.78256e-05		1	0.000159204
Nu53	27.28	0	0.993636	-343.06	-44.9	-8.39	-134.71	46.7	1	-0.06805	32.2	2.02		1	8.72684e-05		1	6.62624e-06
Nu54	25.11	0	0.98686	-337.24	-45.39	-11.52	-134.71	46.7	1	-0.0759	32.2	2.02		1	5.34291e-05		1	7.26592e-05
Nu55	23.35	0	0.998643	-338.55	-44.78	-11.02	-134.71	46.7	1	-0.07225	39.8	2.93		1	1.27468e-06		1	0.000530674
Nu56	20.1	0	0.966183	-332.5	-43.01	-11.04	-134.71	46.7	1	-0.08778	32.2	2.02		1	0.122309		1	0.395141
Nu57	19.61	0	0.996125	-333.81	-42.71	-10.54	-134.71	46.7	1	-0.08367	39.8	2.93		1	0.638823		1	0.296833
Nu58	28.95	0	0.999816	-356.31	-51.32	-7.9	-134.71	46.7	1	-0.04142	39.8	2.94		1	0.191212		1	0.414006
Nu59	18.31	0	0.971517	-347.86	-51.28	-8.42	-134.71	46.7	1	-0.06887	35.4	2.04		0	0.942488		1	0.406604
Nu60	13.09	1	0.158225	-347.86	-57.35	-4.66	-135.03	80.1	1	-0.06887	35.4	2.04		1	0.00561014		0	0.875963
Nu61	16.96	1	0.816687	-326.52	-44.18	-11.4	-134.71	46.7	1	-0.09716	35.4	2.19		1	0.00114049		1	0.00284959
Nu62	13.23	1	0.070778	-326.52	-47.32	-7.85	-135.03	80.1	1	-0.09716	35.4	2.19		1	0.000167631		1	0.000719075
Nu63	16.29	1	0.725924	-323.35	-42.07	-10.94	-134.71	46.7	1	-0.10532	35.4	2.19		0	0.728464		0	0.985365
Nu64	13.58	1	0.0426249	-323.35	-44.87	-6.99	-135.03	80.1	1	-0.10532	35.4	2.19		0	0.906332		0	0.835433
Nu65	19.36	0	0.881992	-338	-52.42	-9.55	-134.71	46.7	1	-0.06783	27	2		0	0.537772		0	0.531613
Nu66	19.5	0	0.532322	-338	-50.93	-7.47	-135.03	80.1	1	-0.06783	27	2		0	0.825253		0	0.455851
Nu67	28.27	0	0.997506	-364.54	-53.83	-11.75	-134.71	46.7	1	-0.08314	38.2	1.96		0	0.68201		0	0.935116
Nu68	16.06	1	0.593047	-340.45	-53.9	-17.37	-134.71	46.7	1	-0.13781	37.1	2.15		1	0.00328135		1	0.00607683
Nu69	19.03	0	0.771117	-342.84	-54.41	-16.21	-134.71	46.7	1	-0.13721	40	2.59		1	0.00368095		1	0.00057401
Nu70	-3.65	1	8.68962e-07	-191.69	-3.96	-58	-122.52	8.93	0	-0.31032	26.6	1.7		1	0.000534797		1	0.00113211
Nu71	-2.45	1	1.45745e-06	-181.02	-3.56	-61.68	-122.52	8.93	0	-0.29898	32.1	2.1		1	0.0144058		1	0.0175883
Nu72	-2.44	1	4.70874e-06	-185.83	-3.68	-61.73	-122.52	8.93	0	-0.29838	29.5	2.1		1	0.044798		1	0.117633
Nu73	-1.46	1	3.81434e-07	-197.78	-3.22	-52.84	-122.52	8.93	0	-0.31138	33.7	1.7		1	0.000198746		1	0.000403533
Nu74	-0.49	1	1.65844e-05	-204	-6.55	-53.37	-122.52	8.93	0	-0.26974	30.5	2.06		1	6.88667e-07		1	0.00181194
Nu75	-1.07	1	6.14922e-06	-203.65	-8.2	-53.56	-122.52	8.93	0	-0.27915	30.1	2.11		1	0.0126272		1	0.000258022
Nu76	0.78	1	8.01533e-06	-205.83	-7.58	-54.36	-122.52	8.93	0	-0.28171	23.3	1.71		1	0.122531		1	0.0345387
Nu77	1.11	1	9.73322e-06	-197.56	-3.25	-59.83	-122.52	8.93	0	-0.30395	27.4	1.7		1	0.00120249		1	0.00157124
Nu78	0.25	1	1.94898e-06	-207.2	-8.24	-53.33	-122.52	8.93	0	-0.29744	29.1	1.79		1	0.000584382		1	0.000472609
Nu79	-0.57	1	7.71105e-07	-202.32	-7.02	-55.47	-122.52	8.93	0	-0.31415	28	1.7		1	0.00201567		1	0.00138029
Nu80	4.41	1	0.000106978	-215.43	-4.54	-50.9	-122.52	8.93	0	-0.28105	32.3	2.23		1	0.0644778		1	0.155995
Nu81	0.65	1	7.1231e-06	-203.29	-4	-56.26	-122.52	8.93	0	-0.30287	27.9	1.7		1	0.0722296		1	0.743528
Nu82	1.7	1	2.0726e-05	-211.85	-7.98	-52.54	-122.52	8.93	0	-0.27315	23.3	1.71		1	0.215309		1	0.421603
Nu83	0.68	1	1.37677e-05	-215.87	-8.32	-50.56	-122.52	8.93	0	-0.2725	30.1	1.71		1	0.0463971		1	0.653026
Nu84	0.79	1	5.87095e-06	-205.94	-4.93	-55.01	-122.52	8.93	0	-0.30133	28.7	1.7		1	0.0228798		1	0.098431
Nu85	0.06	1	3.95697e-06	-204.17	-4.3	-55.22	-122.52	8.93	0	-0.30358	31.7	1.7		1	0.158529		1	0.0810301
Nu86	2.6	1	5.55005e-05	-214.58	-5.36	-56.11	-122.52	8.93	0	-0.2989	27.2	1.7		1	0.216749		1	0.0780481
Nu87	-2.41	1	1.43599e-06	-183.45	-2.7	-63.42	-122.52	8.93	0	-0.31649	23.6	1.7		1	0.0668062		1	0.0320327
Nu88	2.35	1	1.19741e-05	-211.93	-7.77	-53.3	-122.52	8.93	0	-0.28144	29.3	1.7		1	0.210701		1	0.162983
Nu89	1.17	1	7.78448e-05	-202.96	-3.91	-58.49	-122.52	8.93	0	-0.28265	34.8	2.08		1	0.0677968		1	0.091266
Nu90	1	1	7.29806e-06	-200.85	-3.82	-57.59	-122.52	8.93	0	-0.30329	27.6	1.7		1	0.0497751		1	0.0930829
Nu91	-0.65	1	2.35589e-06	-214.91	-7.84	-47.77	-122.52	8.93	0	-0.27887	36.4	1.72		1	0.365806		1	0.0154763
Nu92	-1	1	0.000188744	-202.44	-4.43	-56.26	-122.52	8.93	0	-0.27638	42.9	2.94		1	0.188108		1	0.482039
Nu93	1.65	1	3.09955e-05	-204.98	-4.43	-59.56	-122.52	8.93	0	-0.30312	26.2	1.71		1	0.00537151		1	0.245576
Nu94	2.82	1	1.86528e-05	-204.55	-4.9	-58.11	-122.52	8.93	0	-0.29752	26.8	1.7		1	0.00101648		1	0.00168018
Nu95	-1.55	1	2.65749e-06	-187.68	-4.62	-61.28	-122.52	8.93	0	-0.29605	32.7	1.95		1	0.000165973		1	0.00106796
Nu96	1.18	1	2.03356e-05	-201.25	-4.95	-58.11	-122.52	8.93	0	-0.28454	35.9	1.96		1	0.000362431		1	0.000559245
Nu97	0.08	1	1.26489e-05	-201.24	-5.51	-57.45	-122.52	8.93	0	-0.28612	38.1	2.04		1	0.00101852		1	0.000689572
Nu98	-0.87	1	7.09665e-06	-193.3	-3.61	-58.92	-122.52	8.93	0	-0.29253	22.2	1.7		1	0.000228294		1	0.000275227
Nu99	1.49	1	4.98509e-05	-205.46	-4.68	-56.2	-122.52	8.93	0	-0.27942	22.1	1.71		1	0.00222057		1	7.53712e-05
Nu100	1.17	1	2.61501e-05	-200.48	-5.66	-55.5	-122.52	8.93	0	-0.26779	31.6	2.09		1	0.0468609		1	0.00045346
Nu101	3.09	1	6.59703e-05	-211.61	-5	-54.35	-122.52	8.93	0	-0.27711	27	1.7		1	0.0978566		1	0.129652
Nu102	0.66	1	3.53119e-05	-203.62	-4.73	-56.56	-122.52	8.93	0	-0.28016	22.2	1.7		1	0.110106		1	0.00895055
Nu103	2.6	1	0.000145176	-212.54	-5.26	-54.35	-122.52	8.93	0	-0.27115	22.2	1.71		1	0.108175		1	0.0304861
Nu104	1.17	1	9.42024e-06	-203.68	-4.28	-55.2	-122.52	8.93	0	-0.28736	31.2	1.7		1	0.000782208		1	0.000346968
Nu105	1.1	1	6.15328e-06	-195.91	-3.99	-57.04	-122.52	8.93	0	-0.28901	23.5	1.7		1	0.0152404		1	0.00977632
Nu106	2.3	1	0.000100065	-203.13	-5.66	-59.03	-122.52	8.93	0	-0.27648	28.8	2.04		1	0.00127806		1	0.0188104
Nu107	0.67	1	7.00975e-05	-203.78	-5.91	-57.34	-122.52	8.93	0	-0.26856	33.1	2.05		1	0.00182286		1	0.0235273
Nu108	-0.25	1	3.75398e-05	-207.39	-5.7	-57.85	-122.52	8.93	0	-0.29442	33.2	2		1	0.0240855		1	0.00682086
Nu109	3.93	1	0.000552191	-219.48	-7.82	-56.26	-134.02	37.5	0	-0.26715	34.8	2.06		1	0.00490166		1	0.0890406
Nu110	-0.04	1	1.73416e-06	-203.59	-7.79	-52.92	-122.52	8.93	0	-0.29343	20.2	1.7		1	0.00349052		1	0.0715845
Nu111	14	1	0.520398	-252.86	-13.49	-58.57	-134.71	46.7	0	-0.24665	41.8	2.72		1	0.00801748		1	0.00662307
Nu112	12	1	0.177287	-249.92	-16.59	-58.59	-122.52	8.93	0	-0.25269	41.9	2.71		1	0.223709		1	0.0678425
Nu113	13.8	1	0.42341	-249.92	-14.13	-60.93	-134.71	46.7	0	-0.25269	41.9	2.71		1	0.043991		1	0.0938024
Nu114	15.7	1	0.795663	-262.31	-15.67	-55.21	-134.71	46.7	0	-0.22901	41.7	2.83		1	0.033649		1	0.00591325
Nu115	14.5	1	0.522308	-256.66	-14.4	-57.13	-134.71	46.7	0	-0.24217	41.8	2.64		1	0.00961412		1	0.0669526
Nu116	16.23	1	0.212273	-239.69	-13.38	-67.12	-134.71	46.7	0	-0.25327	32.7	1.94		1	0.0141003		1	0.118484
Nu117	15.85	1	0.400756	-253.24	-11.27	-57.67	-134.71	46.7	0	-0.25199	36.9	2.29		1	0.210131		1	0.186527
Nu118	21.07	0	0.939038	-255.18	-13.68	-65.01	-134.71	46.7	0	-0.22519	38.4	2.13		1	0.00533306		1	0.019656
Nu119	18.42	0	0.872265	-253.08	-13.78	-64.92	-134.71	46.7	0	-0.23096	38.5	2.14		1	0.133137		1	0.00609356
Nu120	9.35	1	0.00445165	-220.8	-6.1	-56.5	-122.52	8.93	0	-0.2505	31.2	1.99		1	0.110815		1	0.0147163
Nu121	8.87	1	0.00264738	-217.77	-7.45	-58.86	-122.52	8.93	0	-0.25514	31.1	2		1	0.0163342		1	0.119608
Nu122	7.66	1	0.0012816	-210.13	-9.04	-65.33	-122.52	8.93	0	-0.27064	31.1	2.02		0	0.419112		1	0.0877835
Nu123	7.17	1	0.000774345	-208.45	-8.36	-65.05	-122.52	8.93	0	-0.2764	31.1	2.03		0	0.264932		0	0.0359936
Nu124	3.96	1	0.000118011	-205.84	-4.6	-61.42	-122.52	8.93	0	-0.29974	30.6	1.98		0	0.478659		0	0.625449
Nu125	25.94	0	0.689839	-243.98	-11.24	-65.56	-134.71	46.68	0	-0.23332	36.4	1.98		0	0.0598578		0	0.509137
Nu126	27.45	0	0.953023	-265.19	-9.85	-57.43	-134.71	46.68	0	-0.21958	48.3	2.06		0	0.62495		0	0.26864
Nu127	26.71	0	0.828158	-256.67	-9.42	-58.16	-134.71	46.68	0	-0.22959	40.8	2.05		1	0.358701		1	0.39246
Nu128	20.24	0	0.760277	-252.37	-10.56	-60.76	-134.71	46.68	0	-0.23397	42.7	2.19		1	0.025881		1	0.121612
Nu129	19.46	0	0.377535	-255.3	-13.42	-59.14	-134.71	46.68	0	-0.23577	46.1	2.06		1	0.41962		0	0.762313
Nu130	17.98	0	0.553194	-251.68	-12.79	-59.92	-134.71	46.68	0	-0.24339	46.1	2.62		0	0.762927		0	0.85317
Nu131	21.61	0	0.815638	-270.99	-18.29	-54.93	-134.71	46.68	0	-0.2105	45.9	2.27		0	0.96434		1	0.0983445
Nu132	20.08	0	0.309986	-260.41	-15.08	-56.53	-134.71	46.68	0	-0.23112	46.2	2.02		1	0.130844		0	0.958367
Nu133	19.38	0	0.631355	-260.63	-14.37	-56.92	-134.71	46.68	0	-0.23177	48.2	2.45		0	0.957116		0	0.946778
Nu134	21.29	0	0.864883	-252.41	-8.37	-65.88	-134.71	46.7	0	-0.25965	30.6	1.7		0	0.348425		1	0.0199934
Nu135	7.84	1	0.00418155	-226.57	-6.13	-55.16	-122.52	8.93	0	-0.2595	24.2	1.7		1	0.0198462		0	0.710675
Nu136	6.98	1	0.0018488	-220.56	-4.62	-57.12	-122.52	8.93	0	-0.27152	26	1.7		1	0.17884		1	0.0115803
Nu137	5.21	1	0.000302804	-228.49	-6.68	-48.92	-122.52	8.93	0	-0.27102	36.5	2.04		0	0.465122		1	0.389384
Nu138	6.43	1	0.00226811	-228.63	-4.94	-52.91	-134.02	37.5	0	-0.2694	33.8	1.95		1	0.532212		1	0.262928
Nu139	6.57	1	0.000578517	-228.63	-5.93	-49.77	-122.52	8.93	0	-0.2694	33.8	1.95		1	0.019973		0	0.836839
Nu140	5.41	1	0.000259239	-225.88	-4.32	-50.39	-122.52	8.93	0	-0.28604	25.7	1.7		1	0.177935		1	0.00853761
Nu141	10.38	1	0.00686254	-245.61	-5.47	-44.48	-122.52	8.93	0	-0.2656	43	2.38		0	0.894835		1	0.0324112
Nu142	10.61	1	0.00640744	-241.26	-6.31	-47.86	-122.52	8.93	0	-0.25985	35	2.01		1	0.0173759		0	0.802798
Nu143	12.34	1	0.0628945	-243.35	-4.67	-51.4	-134.02	37.5	0	-0.25584	32.2	1.91		1	0.597296		1	0.0271052
Nu144	12.56	1	0.0187507	-243.35	-5.38	-48.29	-122.52	8.93	0	-0.25584	32.2	1.91		0	0.674948		1	0.729261
Nu145	6.22	1	0.000202735	-232.72	-8.28	-48.25	-122.52	8.93	0	-0.27375	33.2	1.83		1	0.707196		0	0.466927
Nu146	4.83	1	3.82377e-05	-226.08	-5.01	-48.52	-122.52	8.93	0	-0.28431	42.8	1.7		0	0.350434		0	0.381655
Nu147	8.23	1	0.00104004	-240.59	-8.17	-47.64	-122.52	8.93	0	-0.27439	25	1.7		0	0.985874		0	0.975053
Nu148	-2.94	1	2.39183e-07	-204.29	-3.85	-51.03	-122.52	8.93	0	-0.3272	34.2	1.7		0	0.981078		0	0.995958
Nu149	3.78	1	5.54323e-05	-228.95	-5.17	-48.43	-122.52	8.93	0	-0.2903	39.6	1.7		0	0.992852		0	0.994181
Nu150	9	1	0.00620846	-240.98	-5.15	-46.74	-122.52	8.93	0	-0.26489	32.2	2.05		0	0.991946		0	0.986202
Nu151	9.11	1	0.0207993	-240.98	-4.23	-49.54	-134.02	37.5	0	-0.26489	32.2	2.05		0	0.988699		0	0.992178
Nu152	11.5	1	0.104652	-243.63	-5.4	-47.37	-122.52	8.93	0	-0.24595	40.1	2.73		0	0.98621		0	0.984614
Nu153	4.46	1	0.00582545	-223.8	-7.05	-49.03	-122.52	8.93	0	-0.26244	44.1	3.66		0	0.973355		0	0.980343
Nu154	4.37	1	0.00083029	-211.9	-4.46	-59.24	-122.52	8.93	0	-0.27304	29.8	1.91		0	0.923412		0	0.875736
Nu155	3.92	1	0.000352307	-214.53	-4.44	-57.22	-122.52	8.93	0	-0.28557	21.7	1.7		0	0.91204		0	0.964109
Nu156	3.94	1	0.00107076	-218.74	-5.03	-49.73	-122.52	8.93	0	-0.26646	36.4	2.89		0	0.940123		0	0.956723
Nu157	4.23	1	0.00267892	-214.68	-5.22	-54.86	-122.52	8.93	0	-0.26564	36.3	2.88		0	0.972055		0	0.962007
Nu158	7.32	1	0.00127041	-235.13	-8.55	-50.38	-134.02	37.5	0	-0.26499	43.9	2.23		0	0.977577		0	0.937633
Nu159	13.36	1	0.079509	-247.18	-9.09	-52.47	-122.52	8.93	0	-0.24636	39.9	2.14		0	0.912507		0	0.947428
Nu160	11.4	1	0.0302475	-241.42	-9.57	-55.22	-122.52	8.93	0	-0.25303	40.1	2.05		0	0.957913		0	0.941695
Nu161	14.91	1	0.538816	-252.24	-8.7	-54.37	-122.52	8.93	0	-0.23038	39.7	2.07		0	0.964896		0	0.980555
Nu162	12.51	1	0.0361632	-245.46	-10.54	-53.5	-122.52	8.93	0	-0.24827	40	2.06		1	0.752344		1	0.837543
Nu163	14.02	1	0.246178	-251.69	-8.72	-52.72	-122.52	8.93	0	-0.24365	37.3	2.08		0	0.99438		1	0.81288
Nu164	13.41	1	0.103775	-246.12	-9.17	-55.4	-122.52	8.93	0	-0.25033	37.4	1.97		1	0.369171		1	0.0810031
Nu165	15.91	1	0.423906	-252.18	-8.33	-52.89	-122.52	8.93	0	-0.22966	37.6	1.97		1	0.0704931		0	0.202554
Nu166	12.03	1	0.024882	-242.11	-11.11	-56	-122.52	8.93	0	-0.25467	39.2	2.04		0	0.122106		1	0.0894563
Nu167	12.06	1	0.0585749	-237.46	-7.99	-57	-122.52	8.93	0	-0.2541	35.3	2.07		1	0.0455465		0	0.377952
Nu168	10.76	1	0.0205292	-234.55	-13.29	-59.38	-122.52	8.93	0	-0.24286	39.8	2.17		0	0.489877		0	0.425929
Nu169	11.66	1	0.0884338	-234.55	-12.59	-63.29	-134.02	37.5	0	-0.24286	39.8	2.17		0	0.460661		0	0.145917
Nu170	13.84	1	0.166392	-239.81	-11.66	-59.81	-134.02	37.5	0	-0.23626	39.2	2.21		0	0.428071		0	0.125395
Nu171	12.26	1	0.0797081	-240.04	-12.93	-56.35	-122.52	8.93	0	-0.22278	34.8	2.06		0	0.13635
Nu172	13.87	1	0.253877	-240.04	-11.91	-59.46	-134.02	37.5	0	-0.22278	34.8	2.06
Nu173	8.78	1	0.0279703	-239.72	-14.32	-60.23	-134.02	37.5	0	-0.2465	43.5	2.12
Nu174	9.94	1	0.0528076	-244.46	-13.44	-57.44	-134.02	37.5	0	-0.24096	43.5	2.13
Nu175	11.66	1	0.120846	-246.7	-13.85	-57.8	-134.02	37.5	0	-0.2287	44.5	2.06
Nu176	11.99	1	0.183322	-248.65	-14.54	-57.04	-134.02	37.5	0	-0.22127	44.1	2.12
Nu177	10.63	1	0.128852	-240.54	-16.66	-64.18	-134.02	37.5	0	-0.24128	44.1	2.39
Nu178	10.42	1	0.0911469	-239.51	-15.98	-63.55	-134.02	37.5	0	-0.24436	44.1	2.38
Nu179	11.6	1	0.0516105	-247.64	-9.12	-54.72	-134.02	37.5	0	-0.25945	30.9	1.7
Nu180	10.3	1	0.0302532	-242.81	-10	-57.97	-134.02	37.5	0	-0.26607	30.9	1.7
Nu181	9.96	1	0.00767189	-242.81	-10.92	-54.68	-122.52	8.93	0	-0.26607	30.9	1.7
Nu182	14.09	1	0.282109	-252.14	-10.46	-54.54	-134.02	37.5	0	-0.24055	38.5	2.11
Nu183	15.27	1	0.405399	-253.7	-10.69	-54.55	-134.02	37.5	0	-0.23566	36.6	2.07
Nu184	10.04	1	0.188284	-240.07	-7.94	-55.96	-122.52	8.93	0	-0.2608	43.6	2.9
Nu185	12.26	1	0.139148	-241.63	-8.09	-56.89	-122.52	8.93	0	-0.24936	36.8	2.07
Nu186	7.06	1	0.00536827	-224.56	-10.14	-62.6	-134.02	37.5	0	-0.2662	34.4	1.97
Nu187	5.64	1	0.00179929	-224.07	-11.35	-61.4	-134.02	37.5	0	-0.26924	37.2	2.06
Nu188	4.91	1	0.000979098	-229.5	-13.89	-58.93	-134.02	37.5	0	-0.26278	41.9	2.06
Nu189	4.61	1	0.000620307	-227.71	-10.48	-59.69	-134.02	37.5	0	-0.28211	35.6	1.7
Nu190	5.44	1	0.000169517	-230.22	-15.2	-58.15	-134.02	37.5	0	-0.2778	32.9	1.7
Nu191	5.73	1	0.000468127	-227.34	-12.46	-59.92	-134.02	37.5	0	-0.27781	32.9	1.7
Nu192	5.6	1	0.000323981	-225.17	-13.1	-61.51	-134.02	37.5	0	-0.28209	32.9	1.7
Nu193	6.57	1	0.000580772	-230.4	-12.86	-58.49	-134.02	37.5	0	-0.2738	32.9	1.7
Nu194	12.9	1	0.000472796	-228.63	-6.95	-58.78	-122.52	8.93	0	-0.32181	26.6	1.77
Nu195	11.05	1	0.000174669	-228.63	-4.57	-59.69	-135.03	80.1	0	-0.32181	26.6	1.77
Nu196	11.7	1	0.000106531	-225.27	-7.13	-58.97	-122.52	8.93	0	-0.33572	26.6	1.77
Nu197	10.5	1	4.5585e-05	-225.27	-4.13	-59.66	-135.03	80.1	0	-0.33572	26.6	1.77
Nu198	13.7	1	0.00125667	-236.26	-7.85	-55.1	-122.52	8.93	0	-0.30971	26.6	1.9
Nu199	11.44	1	0.000357911	-236.26	-5.65	-55.45	-135.03	80.1	0	-0.30971	26.6	1.9
Nu200	15.8	1	0.0428975	-246.86	-10.13	-52.82	-122.52	8.93	0	-0.2643	26.6	2.06
Nu201	14.9	1	0.139082	-246.86	-8.99	-55.42	-134.08	36.7	0	-0.2643	26.6	2.06
Nu202	14.8	1	0.102316	-246.86	-7.89	-54.55	-134.71	46.7	0	-0.2643	26.6	2.06
Nu203	13.19	1	0.0105984	-246.86	-7.02	-51.73	-135.03	80.1	0	-0.2643	26.6	2.06
Nu204	15.51	1	0.126954	-246.86	-9.92	-56.22	-134.02	37.5	0	-0.2643	26.6	2.06
Nu205	15.9	1	0.0235734	-246.86	-8.55	-50.34	-119.28	7.58	0	-0.2643	26.6	2.06
Nu206	15.9	1	0.157738	-249.35	-10.63	-52.62	-122.52	8.93	0	-0.26003	26.6	2.43
Nu207	7.69	1	0.000284049	-224.73	-10.71	-61.61	-134.02	37.5	0	-0.30093	26.3	1.58
Nu208	7.77	1	0.000990268	-229.74	-10.08	-57.6	-134.02	37.5	0	-0.29319	26.3	1.96
Nu209	10.73	1	0.0139042	-237.96	-13.7	-61.89	-134.02	37.5	0	-0.2784	28.2	1.98
Nu210	11.58	1	0.0167027	-232.16	-11.25	-67.07	-134.71	46.7	0	-0.28862	25.4	1.77
Nu211	11.47	1	0.0210502	-232.16	-12.17	-67.57	-134.02	37.5	0	-0.28862	25.4	1.77
Nu212	9.63	1	0.00147601	-232.16	-9.5	-63.12	-135.03	80.1	0	-0.28862	25.4	1.77
Nu213	11.9	1	0.0290481	-236.78	-11.55	-63.34	-134.02	37.5	0	-0.28366	25.4	1.91
Nu214	9.91	1	0.00213042	-236.78	-7.79	-57.87	-135.03	80.1	0	-0.28366	25.4	1.91
Nu215	11.31	1	0.0120634	-237.45	-13.62	-61.96	-134.02	37.5	0	-0.28631	25.4	2.05
Nu216	11.43	1	0.0494698	-242.36	-10.82	-57.17	-134.02	37.5	0	-0.28157	25.3	2.38
Nu217	11.51	1	0.0838375	-240.92	-11.14	-61.24	-134.02	37.5	0	-0.26556	33.4	2.05
Nu218	10.03	1	0.00420123	-237.46	-11.46	-58.56	-122.52	8.93	0	-0.29638	30.8	2.13
Nu219	12.92	1	0.0406201	-245.33	-9.5	-57	-122.52	8.93	0	-0.28057	30.6	1.97
Nu220	9.81	1	0.00189751	-231.99	-6.48	-56.94	-122.52	8.93	0	-0.30978	30.2	2.06
Nu221	13.12	1	0.00402629	-236.82	-7.02	-56.97	-122.52	8.93	0	-0.31789	31.1	2.25
Nu222	10.2	1	0.00622575	-231.69	-7.1	-56.04	-122.52	8.93	0	-0.28406	31.5	2.22
Nu223	12.46	1	0.0446579	-251.84	-12.71	-56.16	-122.52	8.93	0	-0.27471	29.1	1.88
Nu224	16.15	1	0.241746	-255.82	-13.92	-56.2	-122.52	8.93	0	-0.26388	30.9	2.29
Nu225	13.58	1	0.0345515	-254.08	-10.31	-54.19	-122.52	8.93	0	-0.28118	31.1	1.72
Nu226	12.64	1	0.0531497	-216.17	-8.94	-72.08	-134.02	37.5	0	-0.25952	25	1.69
Nu227	12.99	1	0.00682203	-216.17	-5.39	-68.37	-135.03	80.1	0	-0.25952	25	1.69
Nu228	12.92	1	0.0452778	-212.38	-9.7	-75.01	-134.02	37.5	0	-0.26193	25	1.69
Nu229	13.19	1	0.0809322	-218.98	-9.05	-70.58	-134.02	37.5	0	-0.25194	25	1.69
Nu230	13	1	0.0106252	-218.98	-4.9	-66.24	-135.03	80.1	0	-0.25194	25	1.69
Nu231	13.42	1	0.151275	-221.14	-9.64	-70.3	-134.02	37.5	0	-0.24244	25	1.7
Nu232	14.28	1	0.018002	-221.14	-6.3	-66.31	-135.03	80.1	0	-0.24244	25	1.7
Nu233	15.7	1	0.130062	-225.94	-3.87	-71.37	-134.71	46.7	0	-0.30215	21.5	1.69
Nu234	15.11	1	0.153631	-225.94	-5.07	-72.04	-134.02	37.5	0	-0.30215	21.5	1.69
Nu235	13.33	1	0.0155304	-225.94	-3.85	-69.76	-135.03	80.1	0	-0.30215	21.5	1.69
Nu236	12.15	1	0.00373698	-206.45	-4.09	-78.84	-134.71	46.7	0	-0.33876	23	1.69
Nu237	10.13	1	0.00441681	-206.45	-5.14	-79.28	-134.02	37.5	0	-0.33876	23	1.69
Nu238	12.35	1	0.0504164	-229.77	-4.98	-68.67	-134.02	37.5	0	-0.30515	31.5	1.68
Nu239	10.48	1	0.00546825	-229.77	-2.83	-65.93	-135.03	80.1	0	-0.30515	31.5	1.68
Nu240	15.28	1	0.0907562	-227.3	-6.22	-70.44	-134.71	46.7	0	-0.29293	22.1	1.69
Nu241	14.29	1	0.108207	-227.3	-8.2	-71.92	-134.02	37.5	0	-0.29293	22.1	1.69
Nu242	13.44	1	0.0138062	-227.3	-4.6	-67.99	-135.03	80.1	0	-0.29293	22.1	1.69
Nu243	14.68	1	0.0570987	-234.01	-2.73	-62.39	-135.03	80.1	0	-0.27635	38.2	2.29
Nu244	18.52	0	0.29481	-233.78	-4.96	-66.92	-134.02	37.5	0	-0.28785	30.4	1.99
Nu245	17.21	0	0.0253655	-233.78	-4.17	-64.13	-135.03	80.1	0	-0.28785	30.4	1.99
Nu246	20.6	0	0.213093	-236.85	-5.3	-58.56	-122.52	8.93	0	-0.2778	42	2.83
Nu247	20.59	0	0.604815	-236.85	-4.56	-63	-134.02	37.5	0	-0.2778	42	2.83
Nu248	17.19	0	0.377436	-234.7	-3.97	-65.25	-134.71	46.7	0	-0.27739	30.4	2.07
Nu249	17.35	0	0.420935	-234.7	-5.34	-66.06	-134.02	37.5	0	-0.27739	30.4	2.07
Nu250	18.13	0	0.0475259	-234.7	-3.68	-62.65	-135.03	80.1	0	-0.27739	30.4	2.07
Nu251	18.9	0	0.206965	-238.57	-5.83	-57.88	-122.52	8.93	0	-0.27685	45.2	2.91
Nu252	18.72	0	0.589433	-238.57	-5.01	-62.16	-134.02	37.5	0	-0.27685	45.2	2.91
Nu253	16.96	1	0.305755	-227.72	-5.32	-70.31	-134.71	46.7	0	-0.27896	30.4	2.04
Nu254	15.65	1	0.344146	-227.72	-6.34	-70.74	-134.02	37.5	0	-0.27896	30.4	2.04
Nu255	15.62	1	0.0285658	-227.72	-7.05	-69.2	-135.03	80.1	0	-0.27896	30.4	2.04
Nu256	16.5	1	0.100175	-232.03	-6.33	-61.25	-122.52	8.93	0	-0.28568	44.4	2.89
Nu257	16.8	1	0.422068	-232.03	-5.99	-66.53	-134.02	37.5	0	-0.28568	44.4	2.89
Nu258	23.05	0	0.812554	-233.03	-3.32	-65.32	-134.02	37.5	0	-0.27796	36.4	2.91
Nu259	20.54	0	0.824898	-241.75	-6.06	-61.43	-134.02	37.5	0	-0.26529	38.1	2.92
Nu260	18.8	0	0.920692	-237.91	-8	-64.94	-134.02	37.5	0	-0.24387	38	2.89
Nu261	12.47	1	0.217391	-355.44	-65.72	-10.26	-135.03	80.1	1	-0.06606	29.3	1.77
Nu262	20.11	0	0.968673	-355.44	-59.47	-11.31	-134.02	37.5	1	-0.06606	29.3	1.77
Nu263	19.91	0	0.961152	-355.44	-58.06	-10.34	-134.71	46.7	1	-0.06606	29.3	1.77
Nu264	14.76	1	0.263057	-343.62	-61.46	-14.86	-135.03	80.1	1	-0.07743	26.5	1.77
Nu265	20.22	0	0.961861	-343.62	-55.82	-15.24	-134.02	37.5	1	-0.07743	26.5	1.77
Nu266	18.97	0	0.950297	-343.62	-54.54	-14.25	-134.71	46.7	1	-0.07743	26.5	1.77
Nu267	10.93	1	0.049968	-344.44	-64.81	-16.83	-135.03	80.1	1	-0.10384	27.1	1.77
Nu268	18	0	0.483811	-344.44	-62.57	-17.91	-134.71	46.7	1	-0.10384	27.1	1.77
Nu269	10.77	1	0.0806425	-344.44	-72.23	-24.75	-135.03	80.1	1	-0.09366	29.5	1.77
Nu270	19.13	0	0.74148	-348.48	-58.39	-12.71	-134.71	46.7	1	-0.09246	28	1.77
Nu271	11.52	1	0.0163796	-343.74	-59.8	-10.11	-135.03	80.1	1	-0.10479	26.2	1.58
Nu272	16.29	1	0.163051	-343.74	-56.5	-8.89	-134.71	46.7	1	-0.10479	26.2	1.58
Nu273	17.52	0	0.522996	-350.78	-60.52	-14.36	-134.71	46.7	1	-0.11769	29.3	1.89
Nu274	14.87	1	0.335385	-349.94	-56.89	-10.31	-134.71	46.7	1	-0.12105	29.4	1.77
Nu275	16.03	1	0.568745	-350.61	-57.61	-12.11	-134.71	46.7	1	-0.12494	29.7	2.05
Nu276	15.52	1	0.206558	-347.62	-56.34	-11.32	-134.71	46.7	1	-0.13384	29.4	1.77
Nu277	10.78	1	0.025775	-328.63	-55.71	-14.53	-134.02	37.5	1	-0.15124	32.3	2.2
Nu278	21.09	0	0.892507	-357.89	-63.49	-11.25	-134.71	46.7	1	-0.06092	25.2	1.56
Nu279	11	1	0.0160797	-339.67	-61.03	-14.92	-135.03	80.1	1	-0.11935	27	1.77
Nu280	15.03	1	0.212663	-339.67	-58.36	-15.34	-134.71	46.7	1	-0.11935	27	1.77
Nu281	11.17	1	0.0681069	-342.93	-61.38	-13.28	-135.03	80.1	1	-0.09494	28.9	1.87
Nu282	17.63	0	0.890371	-342.93	-54.22	-14.51	-134.71	46.7	1	-0.09494	28.9	1.87
Nu283	10.75	1	0.032924	-341.28	-61.55	-13.9	-135.03	80.1	1	-0.10068	28.9	1.77
Nu284	17.04	0	0.778032	-341.28	-54.64	-15.17	-134.71	46.7	1	-0.10068	28.9	1.77
Nu285	10.06	1	0.0466408	-337.01	-58.34	-13.92	-135.03	80.1	1	-0.10398	29.8	1.9
Nu286	14.78	1	0.633186	-337.01	-55.97	-16.82	-134.71	46.7	1	-0.10398	29.8	1.9
Nu287	15.7	1	0.58007	-351.84	-53.89	-7.17	-134.71	46.7	1	-0.10141	28.7	1.55
Nu288	23.35	0	0.933391	-274.2	-18.12	-50.48	-119.28	7.58	0	-0.26724	48.7	4.39
Nu289	21.72	0	0.877659	-274.65	-18.69	-49.31	-119.28	7.58	0	-0.27458	47.2	4.46
Nu290	16.54	1	0.642263	-270.69	-12.49	-50.93	-119.28	7.58	0	-0.26623	39.7	2.71
Nu291	20.41	0	0.302769	-269.34	-15.72	-51.97	-119.28	7.58	0	-0.26159	36.1	2.37
Nu292	23	0	0.552516	-278.17	-18.18	-47.55	-119.28	7.58	0	-0.26172	39.8	3.14
Nu293	18.86	0	0.985079	-357.15	-56.66	-7.49	-134.08	36.7	1	-0.0499	23.8	1.52
Nu294	19.86	0	0.97428	-357.15	-56.19	-6.68	-134.71	46.7	1	-0.0499	23.8	1.52
Nu295	18.53	0	0.981862	-357.15	-57.79	-8.23	-134.02	37.5	1	-0.0499	23.8	1.52
Nu296	19.9	0	0.995594	-359.34	-56.48	-8.44	-134.08	36.7	1	-0.04325	23.8	1.52
Nu297	20.09	0	0.992352	-359.34	-55.94	-7.56	-134.71	46.7	1	-0.04325	23.8	1.52
Nu298	20.62	0	0.994281	-359.34	-57.66	-9.05	-134.02	37.5	1	-0.04325	23.8	1.52
Nu299	19.9	0	0.990322	-356.67	-55.41	-8.36	-134.08	36.7	1	-0.0537	23.8	1.52
Nu300	19.67	0	0.983327	-356.67	-54.56	-7.17	-134.71	46.7	1	-0.0537	23.8	1.52
Nu301	21.7	0	0.98794	-356.67	-56.79	-9.29	-134.02	37.5	1	-0.0537	23.8	1.52
Nu302	19.65	0	0.991371	-358.27	-56.29	-7.63	-134.08	36.7	1	-0.04745	23.8	1.52
Nu303	19.08	0	0.985025	-358.27	-55.71	-6.7	-134.71	46.7	1	-0.04745	23.8	1.52
Nu304	19.67	0	0.978169	-350.15	-52.5	-8.19	-134.08	36.7	1	-0.06199	23.8	1.52
Nu305	20.34	0	0.962974	-350.15	-51.94	-7.32	-134.71	46.7	1	-0.06199	23.8	1.52
Nu306	18.32	0	0.974429	-350.15	-53.5	-8.9	-134.02	37.5	1	-0.06199	23.8	1.52
Nu307	17.85	0	0.873626	-337.88	-49.16	-10.59	-134.08	36.7	1	-0.08616	23.8	1.52
Nu308	18.78	0	0.802916	-337.88	-48.5	-9.66	-134.71	46.7	1	-0.08616	23.8	1.52
Nu309	19.58	0	0.865648	-337.88	-50.1	-11.5	-134.02	37.5	1	-0.08616	23.8	1.52
Nu310	22.05	0	0.931977	-343.75	-48.54	-7.42	-134.08	36.7	1	-0.07989	23.8	1.52
Nu311	18.98	0	0.889798	-343.75	-47.88	-6.49	-134.71	46.7	1	-0.07989	23.8	1.52
Nu312	21.69	0	0.924703	-343.75	-49.53	-8.27	-134.02	37.5	1	-0.07989	23.8	1.52
Nu313	18.39	0	0.946734	-346.25	-50.47	-8.13	-134.02	37.5	1	-0.07249	26.5	1.52
Nu314	18.47	0	0.922556	-346.25	-48.76	-6.34	-134.71	46.68	1	-0.07249	26.5	1.52
Nu315	20.37	0	0.95311	-346.25	-49.41	-7.28	-134.08	36.71	1	-0.07249	26.5	1.52
Nu316	18.39	0	0.924846	-343.63	-52.02	-8.73	-134.02	37.5	1	-0.07692	32	1.98
Nu317	18.47	0	0.887081	-343.63	-50.29	-6.78	-134.71	46.68	1	-0.07692	32	1.98
Nu318	20.37	0	0.930803	-343.63	-50.94	-7.73	-134.08	36.71	1	-0.07692	32	1.98
Nu319	25.51	0	0.916603	-341.18	-49.42	-10.29	-134.02	37.5	1	-0.08255	26.4	1.52
Nu320	21.29	0	0.880456	-341.18	-48.02	-8.82	-134.71	46.68	1	-0.08255	26.4	1.52
Nu321	22.41	0	0.925565	-341.18	-48.68	-9.74	-134.08	36.71	1	-0.08255	26.4	1.52
Nu322	18.81	0	0.977337	-355.61	-57.28	-9.08	-134.02	37.5	1	-0.05355	26.5	1.52
Nu323	15.05	1	0.709079	-333.31	-46.74	-10	-134.08	36.7	1	-0.09955	23.8	1.52
Nu324	14.32	1	0.591276	-333.31	-46.07	-9.08	-134.71	46.7	1	-0.09955	23.8	1.52
Nu325	15.14	1	0.685987	-333.31	-47.44	-10.55	-134.02	37.5	1	-0.09955	23.8	1.52
Nu326	21.02	0	0.991345	-343.17	-46.05	-6.26	-134.71	46.68	1	-0.06756	47	2.74
Nu327	16.9	1	0.397017	-356.3	-60.03	-6.02	-134.02	37.5	1	-0.09818	21.9	1.52
Nu328	16.45	1	0.0719766	-347.76	-58.35	-8.46	-134.02	37.5	1	-0.12854	23.3	1.52
Nu329	18.74	0	0.095148	-335.35	-50.04	-10.43	-131.23	20.7	1	-0.15242	23.2	1.52
Nu330	15.3	1	0.0371885	-335.35	-50.94	-10.02	-134.02	37.5	1	-0.15242	23.2	1.52
Nu331	18.8	0	0.0440981	-326.75	-46.76	-12.4	-131.23	20.7	1	-0.16856	23.2	1.52
Nu332	14.9	1	0.0185443	-326.75	-47.32	-11.95	-134.02	37.5	1	-0.16856	23.2	1.52
Nu333	16.03	1	0.0881037	-348.35	-57.43	-5.49	-134.02	37.5	1	-0.11692	21.3	1.52
Nu334	22.4	0	0.48028	-339.01	-59.47	-10.59	-134.02	37.5	1	-0.06295	31.3	1.8
Nu335	23.84	0	0.54774	-337.81	-57.51	-10.4	-134.02	37.5	1	-0.06453	31.8	1.8
Nu336	21.72	0	0.469875	-334.41	-56.24	-10.99	-134.02	37.5	1	-0.06983	31.4	1.8
Nu337	20.93	0	0.527678	-338.74	-57.62	-9.01	-134.02	37.5	1	-0.06036	31.6	1.8
Nu338	19.3	0	0.18792	-334.85	-55.49	-5.8	-134.02	37.5	1	-0.07132	28.5	1.8
Nu339	21.2	0	0.534343	-342.75	-57.18	-5.55	-134.02	37.5	1	-0.06112	27.2	1.8
Nu340	20.11	0	0.217138	-330.96	-57.56	-10.5	-134.02	37.5	1	-0.0777	32.5	2.09
Nu341	19.6	0	0.219073	-330.96	-55.93	-9.97	-134.71	46.68	1	-0.0777	32.5	2.09
